# Supplementary material for: Identification of Claudin-6 as a Molecular Biomarker in Pan-Cancer Through Multiple Omics Integrative Analysis
Source: Front Cell Dev Biol. 2021 Aug 2;9:726656. doi: 10.3389/fcell.2021.726656 (PMC8365468; doi:10.3389/fcell.2021.726656)
Supplement: Supplementary file 11 [file Data_Sheet_1.ZIP]

Archive with 79 entries (77 files):
- data/CELL_supplemental/
- data/CELL_supplemental/ACC_clinical_CELL_supplemental.xlsx
- data/CELL_supplemental/BLCA_clinical_CELL_supplemental.xlsx
- data/CELL_supplemental/BRCA_clinical_CELL_supplemental.xlsx
- data/CELL_supplemental/CHOL_clinical_CELL_supplemental.xlsx
- data/CELL_supplemental/COAD_clinical_CELL_supplemental.xlsx
- data/CELL_supplemental/COADREAD_clinical_CELL_supplemental.xlsx
- data/CELL_supplemental/DLBC_clinical_CELL_supplemental.xlsx
- data/CELL_supplemental/ESCA_clinical_CELL_supplemental.xlsx
- data/CELL_supplemental/GBM_clinical_CELL_supplemental.xlsx
- data/CELL_supplemental/GBMLGG_clinical_CELL_supplemental.xlsx
- data/CELL_supplemental/HNSC_clinical_CELL_supplemental.xlsx
- data/CELL_supplemental/KICH_clinical_CELL_supplemental.xlsx
- data/CELL_supplemental/KIRC_clinical_CELL_supplemental.xlsx
- data/CELL_supplemental/KIRP_clinical_CELL_supplemental.xlsx
- data/CELL_supplemental/LAML_clinical_CELL_supplemental.xlsx
- data/CELL_supplemental/LGG_clinical_CELL_supplemental.xlsx
- data/CELL_supplemental/LIHC_clinical_CELL_supplemental.xlsx
- data/CELL_supplemental/LUAD_clinical_CELL_supplemental.xlsx
- data/CELL_supplemental/LUSC_clinical_CELL_supplemental.xlsx
- data/CELL_supplemental/MESO_clinical_CELL_supplemental.xlsx
- data/CELL_supplemental/OV_clinical_CELL_supplemental.xlsx
- data/CELL_supplemental/PAAD_clinical_CELL_supplemental.xlsx
- data/CELL_supplemental/PCPG_clinical_CELL_supplemental.xlsx
- data/CELL_supplemental/PRAD_clinical_CELL_supplemental.xlsx
- data/CELL_supplemental/READ_clinical_CELL_supplemental.xlsx
- data/CELL_supplemental/SARC_clinical_CELL_supplemental.xlsx
- data/CELL_supplemental/SKCM_clinical_CELL_supplemental.xlsx
- data/CELL_supplemental/STAD_clinical_CELL_supplemental.xlsx
- data/CELL_supplemental/TGCT_clinical_CELL_supplemental.xlsx
- data/CELL_supplemental/THCA_clinical_CELL_supplemental.xlsx
- data/CELL_supplemental/THYM_clinical_CELL_supplemental.xlsx
- data/CELL_supplemental/UCEC_clinical_CELL_supplemental.xlsx
- data/CELL_supplemental/UCS_clinical_CELL_supplemental.xlsx
- data/CELL_supplemental/UVM_clinical_CELL_supplemental.xlsx
- data/CLDN6 expression.xlsx
- data/Clinical data/
- data/Clinical data/ACC_clinical_raw.xlsx
- data/Clinical data/BLCA_clinical_raw.xlsx
- data/Clinical data/BRCA_clinical_raw.xlsx
- data/Clinical data/CESC_clinical_raw.xlsx
- data/Clinical data/CHOL_clinical_raw.xlsx
- data/Clinical data/COAD_clinical_raw.xlsx
- data/Clinical data/COADREAD_clinical_raw.xlsx
- data/Clinical data/DLBC_clinical_raw.xlsx
- data/Clinical data/ESCA_clinical_raw.xlsx
- data/Clinical data/GBM_clinical_raw.xlsx
- data/Clinical data/GBMLGG_clinical_raw.xlsx
- data/Clinical data/HNSC_clinical_raw.xlsx
- data/Clinical data/KICH_clinical_raw.xlsx
- data/Clinical data/KIRC_clinical_raw.xlsx
- data/Clinical data/KIRP_clinical_raw.xlsx
- data/Clinical data/LAML_clinical_raw.xlsx
- data/Clinical data/LGG_clinical_raw.xlsx
- data/Clinical data/LIHC_clinical_raw.xlsx
- data/Clinical data/LUAD_clinical_raw.xlsx
- data/Clinical data/LUSC_clinical_raw.xlsx
- data/Clinical data/MESO_clinical_raw.xlsx
- data/Clinical data/OV_clinical_raw.xlsx
- data/Clinical data/PAAD_clinical_raw.xlsx
- data/Clinical data/PCPG_clinical_raw.xlsx
- data/Clinical data/PRAD_clinical_raw.xlsx
- data/Clinical data/READ_clinical_raw.xlsx
- data/Clinical data/SARC_clinical_raw.xlsx
- data/Clinical data/SKCM_clinical_raw.xlsx
- data/Clinical data/STAD_clinical_raw.xlsx
- data/Clinical data/TGCT_clinical_raw.xlsx
- data/Clinical data/THCA_clinical_raw.xlsx
- data/Clinical data/THYM_clinical_raw.xlsx
- data/Clinical data/UCEC_clinical_raw.xlsx
- data/Clinical data/UCS_clinical_raw.xlsx
- data/Clinical data/UVM_clinical_raw.xlsx
- data/co-expression genes.xlsx
- data/DEGs.csv
- data/string_interactions of 50 targeted binding proteins.tsv
- data/string_interactions of DEGs.tsv
- data/The GO analysis of 50 targeted binding proteins of CLDN6.docx
- data/The GO and KEGG analyses of DEGs.xlsx
- data/The KEGG analysis of 50 targeted binding proteins of CLDN6.docx
