# Supplementary material for: Identification of Claudin-6 as a Molecular Biomarker in Pan-Cancer Through Multiple Omics Integrative Analysis
Source: Front Cell Dev Biol. 2021 Aug 2;9:726656. doi: 10.3389/fcell.2021.726656 (PMC8365468; doi:10.3389/fcell.2021.726656)
Supplement: Supplementary file 11 [file Data_Sheet_1.ZIP › data/DEGs.csv]

gene_name	log2FoldChange	pvalue	padj
TSPAN6	0.280148441	1.16E-07	1.09E-06
TNMD	1.629248621	2.40E-13	6.82E-12
DPM1	0.326444914	2.83E-09	3.70E-08
SCYL3	-0.305454489	1.86E-08	2.06E-07
C1orf112	0.351455852	1.18E-08	1.36E-07
FGR	-0.224428717	0.02835415	0.064761158
CFH	-0.363251335	0.005666091	0.016643024
FUCA2	-0.039426156	0.393628545	0.528746401
GCLC	-0.097314035	0.264685597	0.391692782
NFYA	0.286647677	4.07E-11	7.64E-10
STPG1	-0.442270271	1.56E-11	3.17E-10
NIPAL3	-0.062304619	0.221896776	0.342180308
LAS1L	0.087376486	0.035987583	0.078821219
ENPP4	-0.366292196	2.00E-07	1.78E-06
SEMA3F	0.421430267	6.00E-07	4.83E-06
CFTR	-0.353689652	0.07909714	0.150587556
ANKIB1	-0.006101477	0.894842545	0.931488482
CYP51A1	-0.162167652	0.089274392	0.166129264
KRIT1	0.05005552	0.313308792	0.444777754
RAD52	0.010613186	0.845680438	0.8977007
MYH16	0.725240564	4.48E-08	4.58E-07
BAD	-0.135879789	0.029520508	0.066989168
LAP3	0.19989206	0.006104756	0.017720755
CD99	-0.361719275	2.86E-07	2.47E-06
HS3ST1	-0.470249145	7.27E-05	0.000362064
AOC1	0.619032233	0.003004739	0.009618098
WNT16	0.36349925	0.058455137	0.117459273
HECW1	0.172444563	0.192416098	0.306989498
MAD1L1	-0.187706813	0.003875886	0.011968996
LASP1	0.214670914	0.000301868	0.001280475
SNX11	-0.026197022	0.511169773	0.639364173
TMEM176A	0.383055673	0.004930388	0.014749507
M6PR	0.164192028	0.015877615	0.039887448
KLHL13	-0.092481535	0.457841799	0.589983011
CYP26B1	0.588599485	6.33E-05	0.000320124
ICA1	-0.49460331	4.27E-12	9.80E-11
DBNDD1	0.042137412	0.573603333	0.693122795
ALS2	0.141924297	0.000843046	0.003172144
CASP10	0.166063888	0.100614399	0.182909919
CFLAR	-0.138514265	0.001387782	0.004898436
TFPI	0.463419667	0.001081867	0.003937453
NDUFAF7	0.189056006	1.26E-05	7.54E-05
RBM5	-0.228506617	2.62E-05	0.000144375
MTMR7	0.203353031	0.03357806	0.074399104
SLC7A2	-0.4628757	0.013898312	0.035612386
ARF5	-0.041454577	0.437871914	0.570980295
SARM1	-0.091378437	0.178722179	0.289575818
POLDIP2	0.07720371	0.056414281	0.113965108
PLXND1	0.206754797	0.004192928	0.012815496
AK2	0.180687758	1.67E-05	9.69E-05
CD38	-0.282908065	0.055247583	0.112078373
FKBP4	0.251276493	4.84E-05	0.000251363
KDM1A	0.197011866	9.68E-07	7.48E-06
RBM6	-0.101552157	0.101722766	0.184639604
CAMKK1	0.045110209	0.613139565	0.72626642
RECQL	0.264570477	0.000287409	0.001226162
VPS50	-0.069241556	0.111044495	0.197956912
HSPB6	0.383707183	0.008357225	0.023156701
ARHGAP33	0.152346712	0.083294609	0.157091261
NDUFAB1	0.081851234	0.137090319	0.234575595
PDK4	-0.401509545	0.000334707	0.001402228
SLC22A16	0.845481391	2.47E-05	0.000136931
ZMYND10	-1.034757984	7.19E-10	1.06E-08
ABCB5	0.708410975	4.69E-05	0.000244532
ARX	0.303806993	0.290104976	0.419829881
SLC25A13	0.111766355	0.015644208	0.039380213
ST7	-0.106108428	0.01279237	0.033176245
CDC27	0.128952222	0.007023343	0.019989823
SLC4A1	0.345294541	0.046725542	0.097600616
CALCR	0.097144243	0.554742534	0.676867886
HCCS	-0.017357094	0.702286226	0.795745387
DVL2	0.19843276	0.000101299	0.000486072
PRSS22	-0.039394841	0.735997339	0.821931489
UPF1	-0.010348809	0.797326716	0.86471618
SKAP2	0.225770453	0.045259263	0.095088896
SLC25A5	0.130245612	0.037018088	0.080619274
MCUB	0.045456878	0.579318755	0.698194537
HOXA11	-0.1702923	0.19269013	0.307304158
POLR2J	-0.155480407	0.020600158	0.049563516
DHX33	0.113702134	0.005500066	0.016218466
MEOX1	2.865787276	2.24E-69	8.95E-66
THSD7A	0.353318247	0.005550147	0.016346866
LIG3	0.031368709	0.460534954	0.592327868
RPAP3	0.219043617	1.16E-05	6.98E-05
ACSM3	-0.274545316	0.003740928	0.01160601
REXO5	-0.126807746	0.042010809	0.089404812
CIAPIN1	0.136825521	0.001117563	0.004048218
SPPL2B	-0.490064692	5.50E-15	2.12E-13
FAM214B	0.080254241	0.183859728	0.29630403
COPZ2	0.063269191	0.507240531	0.635902313
PRKAR2B	0.495914835	3.61E-05	0.000193578
MSL3	0.115631596	0.002463759	0.008073099
CREBBP	0.094612768	0.070419036	0.136946251
TSPOAP1	0.234231335	0.010289172	0.027591119
MPO	0.069998522	0.634708655	0.742994282
PON1	-0.798572615	0.000292173	0.001243967
GCFC2	0.152090168	0.003197332	0.010135652
WDR54	-0.148357772	0.080496592	0.152743094
CROT	-0.115520479	0.055021988	0.111676884
ABCB4	0.014271011	0.898810938	0.934063919
KMT2E	-0.03658026	0.468585825	0.599713709
RHBDD2	-0.011443335	0.857316763	0.905716415
SOX8	-0.187654951	0.213964744	0.332879182
IBTK	-0.106391789	0.041892246	0.089223682
ZNF195	0.153485548	0.003608903	0.011255737
MYCBP2	0.298678059	6.14E-06	3.95E-05
FBXL3	0.28598756	5.18E-08	5.21E-07
ITGAL	-0.426748238	0.000203988	0.000905006
PDK2	0.270030722	0.000408271	0.00166866
ITGA3	0.322392345	0.001610426	0.005572696
ZFX	0.050685629	0.322785447	0.45469766
LAMP2	-0.211337693	0.000286728	0.001223777
ITGA2B	-0.066845064	0.573690543	0.693198506
ASB4	0.225054037	0.308972385	0.440058245
GDE1	0.102353997	0.005966917	0.01738882
REX1BD	-0.068004236	0.365747627	0.499904237
CRLF1	1.313238136	1.34E-14	4.86E-13
OSBPL7	-0.198180017	0.004216056	0.012878315
TMEM98	0.301772732	0.000510029	0.002032243
YBX2	1.158157707	1.68E-12	4.14E-11
KRT33A	0.197741137	0.493094142	0.622773014
MAP3K14	-0.063453291	0.301335587	0.431995682
ABCC8	-0.127705264	0.515896248	0.643346725
CACNG3	0.350044612	0.219553546	0.339443458
TMEM132A	-0.298068942	0.000198866	0.000884637
AP2B1	-0.085390122	0.052353989	0.107136757
TAC1	0.656785385	0.003274984	0.01034656
ZNF263	-0.01984708	0.58584584	0.703750262
CX3CL1	-0.449313426	7.34E-05	0.000364886
SPATA20	-0.380680586	2.16E-08	2.36E-07
CACNA1G	0.108040621	0.459633123	0.591533417
TNFRSF12A	0.446884615	6.06E-07	4.87E-06
DLX6	-0.352621899	0.002526325	0.008248388
MAP3K9	0.073894993	0.249917516	0.374703013
RALA	0.25001864	3.76E-10	5.87E-09
BAIAP2L1	-0.259587777	3.42E-06	2.34E-05
KDM7A	-0.504728845	1.80E-12	4.40E-11
ETV1	0.140385935	0.216864347	0.336130076
AGK	-0.120361908	0.002548521	0.008310005
ALDH3B1	0.022260059	0.845724983	0.897706013
TTC22	0.066062852	0.528878007	0.654881625
PHTF2	0.094195947	0.118533947	0.208476556
CCL26	-0.13896996	0.422335553	0.556122404
FARP2	0.080883221	0.103559293	0.187293362
USH1C	-0.321883458	0.093659516	0.172571777
GGCT	-0.108149693	0.085584417	0.160603805
DBF4	0.134772158	0.048829955	0.101130432
TBXA2R	-0.056800549	0.518062806	0.645187407
IFRD1	0.012121569	0.847131864	0.898682154
LGALS14	0.982655099	0.002513405	0.008214918
COX10	-0.068265057	0.062228335	0.123723773
GTF2IRD1	0.322363381	4.34E-10	6.69E-09
PAF1	0.13563458	0.029726929	0.067384022
VPS41	0.022363524	0.602937121	0.718114767
ARHGAP44	-0.153681347	0.086971493	0.162638114
ELAC2	-0.154981284	0.000335213	0.001404202
SCIN	0.065171294	0.603007145	0.718134034
ARSD	-0.548573846	2.41E-17	1.41E-15
PNPLA4	0.009814125	0.894744941	0.931488482
MYH13	0.972542653	2.65E-05	0.000146051
ADIPOR2	0.126442185	0.000426268	0.001732833
CDKL3	0.075880441	0.255969068	0.381782271
UPP2	-0.424029612	0.001605839	0.005558268
PRSS21	1.156536163	1.01E-07	9.61E-07
MARK4	0.237752054	2.36E-06	1.67E-05
PROM1	-0.462059872	0.001421446	0.004996542
CCDC124	0.004994262	0.937600655	0.960289925
CEACAM21	-0.25427798	0.155030275	0.258556335
PAFAH1B1	-0.002085083	0.952264965	0.969589583
NOS2	-0.555946622	0.000617764	0.002411329
DNAH9	-1.249647175	1.87E-11	3.75E-10
KIAA0100	0.172633579	0.00053833	0.002134384
SLC13A2	-0.6630203	0.006421514	0.018497973
GAS7	0.211183653	0.036431516	0.07959745
TRAPPC6A	0.027702536	0.739613117	0.824532986
MATK	-0.234173617	0.060446966	0.120818437
CEACAM7	-0.863060215	0.00190542	0.006451755
CD79B	-0.298906336	0.026238584	0.060754645
SCN4A	2.240064077	2.48E-39	1.68E-36
ST7L	0.028455598	0.512951971	0.640793562
TKTL1	4.665275478	4.93E-94	6.58E-90
PAX6	-0.362541086	0.00302396	0.009669847
RPUSD1	0.071334458	0.284516864	0.413619971
RHBDF1	-0.120004916	0.098402368	0.179664142
LUC7L	-0.090779086	0.136534073	0.233843825
CACNA2D2	1.221154852	3.91E-15	1.55E-13
BAIAP3	-0.923119803	4.04E-11	7.59E-10
TSR3	0.075742729	0.197213993	0.312823005
PIGQ	-0.088923441	0.160655671	0.265991009
CRAMP1	0.102024612	0.015136021	0.038296153
TEAD3	0.32956411	1.92E-10	3.17E-09
SELE	0.09115445	0.549806357	0.6728002
DNAJC11	0.202987977	0.000283355	0.00121171
FMO3	-0.386360282	0.03106797	0.06979608
MYLIP	-0.126776479	0.04281777	0.090822614
NOX1	-0.487635688	2.16E-06	1.54E-05
E2F2	0.340444978	2.64E-05	0.000145405
PSMB1	-0.007079338	0.89272685	0.930055385
SYN1	0.855863204	6.29E-13	1.67E-11
JARID2	0.168717188	0.000193057	0.000861575
CDKL5	0.523124319	5.71E-10	8.62E-09
CAMK1G	0.44517271	9.40E-05	0.000454987
CDK11A	-0.046100403	0.438443543	0.571515313
NADK	0.084600748	0.067927771	0.133032561
TFAP2B	-0.282983716	0.249044492	0.37371619
TFAP2D	-0.008254695	0.977947937	0.986180694
DLEC1	-1.119598508	3.16E-11	6.04E-10
CYTH3	0.174507956	0.002578448	0.008398692
ADAM22	-0.003093254	0.973966846	0.983579169
SYPL1	-0.127606545	0.011334628	0.02994105
CYB561	-0.390784293	9.25E-12	1.99E-10
SPAG9	0.004371617	0.933982972	0.958091904
CELSR3	0.694179847	5.07E-12	1.15E-10
AASS	-0.131642626	0.203611661	0.320417675
PLEKHG6	0.493837096	5.00E-08	5.06E-07
SS18L2	-0.035815175	0.458788776	0.590822716
MPND	-0.388150718	1.73E-08	1.93E-07
MGST1	-0.415702188	0.000419969	0.00171053
CRY1	0.243409125	6.46E-06	4.14E-05
PGLYRP1	0.165518738	0.312316066	0.443762109
NFIX	-0.169111215	0.109253861	0.195436723
ST3GAL1	0.093781066	0.31042665	0.441610718
MMP25	-0.129492832	0.255876537	0.38169212
IL32	-0.04717037	0.708120905	0.800652453
PKD1	-0.061457328	0.361490986	0.495253668
MAPK8IP2	0.160540163	0.267575228	0.395054185
MED24	0.130092044	0.073751132	0.142102979
RHOBTB2	0.071120694	0.241069771	0.36455231
HEATR5B	-0.214934828	8.64E-06	5.37E-05
SEC62	0.015611292	0.768514625	0.845083048
RPS20	0.051414688	0.483823877	0.614147324
CSDE1	0.184665824	1.90E-07	1.70E-06
UBE3C	-0.002770736	0.95050836	0.968642103
REV3L	0.076301918	0.348034494	0.481267394
TENM1	1.950678139	4.97E-18	3.27E-16
PAX7	0.944523609	0.00220678	0.00732402
MASP2	0.250883672	0.018279122	0.044858793
IYD	-0.554165694	0.002000967	0.006729149
FAM76A	-0.000968354	0.981337042	0.988267198
TRAF3IP3	-0.363761335	0.000625699	0.002438685
POMT2	0.204699498	2.53E-06	1.78E-05
VTA1	0.21728993	6.64E-09	8.04E-08
MLXIPL	0.317683322	0.024127974	0.056677789
BAZ1B	0.145052163	0.000189803	0.000848755
RANBP9	0.089382875	0.022256538	0.052940655
ETV7	-0.082011093	0.503098927	0.631918029
SPRTN	-0.014928061	0.739342465	0.824309675
EEF1AKNMT	0.020287602	0.713651562	0.805063929
DYRK4	-0.150190914	0.010924332	0.029006609
ZNF207	0.06724886	0.033712233	0.074642652
UQCRC1	-0.039515608	0.510960097	0.639203381
STARD3NL	0.144088567	0.003107735	0.009892383
CD9	0.218177864	0.001949649	0.006580909
HHATL	-0.353387187	0.079133149	0.150629769
NCAPD2	0.397356882	6.41E-13	1.70E-11
IFFO1	-0.258049209	0.002018381	0.006779163
GIPR	-1.079345823	1.06E-13	3.21E-12
PHF7	-0.460383576	1.48E-11	3.03E-10
SEMA3G	-0.319400151	0.001396865	0.004924101
NISCH	-0.16109013	0.00295231	0.009468286
STAB1	-0.22370352	0.009138944	0.02495959
FUZ	0.144554176	0.07466609	0.143579525
SLC6A13	2.054899088	5.88E-28	1.31E-25
IDS	0.174783712	0.000821405	0.003100633
PRSS3	-0.302270346	0.120157422	0.210748248
ZNF200	0.01277099	0.761324498	0.839958471
CD4	-0.197659495	0.036821464	0.080243475
LRRC23	-0.787645358	6.25E-11	1.13E-09
BTK	-0.079493533	0.443491838	0.576186554
HFE	-0.492209378	8.89E-09	1.05E-07
SCMH1	-0.26017151	3.22E-09	4.16E-08
FYN	0.373341869	1.58E-05	9.23E-05
HIVEP2	0.341859779	2.61E-07	2.27E-06
FMO1	0.004568786	0.968771633	0.980287419
ELOA	0.066477045	0.053463614	0.109028276
LYPLA2	0.184843684	0.000303953	0.001288499
CLCN6	0.247050548	5.77E-07	4.66E-06
MRC2	0.41919611	2.38E-05	0.00013294
NME1-NME2	0.135095915	0.200269266	0.316515371
SLC6A7	0.245348137	0.120050095	0.210615402
TSPAN9	-0.130632071	0.040361717	0.086572238
BTBD7	0.040196606	0.383679556	0.518498837
APBA3	-0.268088542	1.91E-06	1.38E-05
MKS1	0.039655938	0.408927374	0.543583471
ABHD5	-0.375776837	1.02E-10	1.77E-09
ANOS1	0.77480765	1.38E-08	1.57E-07
AKAP8L	0.269369103	4.96E-07	4.07E-06
MBTD1	0.33805753	1.53E-08	1.73E-07
UTP18	0.268271875	2.88E-08	3.07E-07
RNF216	0.163422686	2.25E-05	0.000125949
TTC19	-0.158288887	0.000144589	0.000665843
PTBP1	-0.001566434	0.959033954	0.974104835
DPF1	0.62310239	2.68E-08	2.87E-07
SYT7	0.050167981	0.705321027	0.79841526
LARS2	-0.021628751	0.663864051	0.766816962
PIK3C2A	0.041345364	0.5150064	0.642450726
PLAUR	-0.356993793	0.000134944	0.00062735
ANLN	0.325365167	0.000135927	0.000631123
WIZ	0.298115186	9.71E-12	2.08E-10
RABGAP1	-4.45E-05	0.999089531	0.999334275
DCN	-0.26416331	0.031276813	0.070181798
QPCTL	0.073551421	0.290565648	0.420184371
PPP5C	0.160809674	0.000231651	0.001013684
CEP68	0.023846317	0.614837794	0.727628046
MAP4K3	0.199703823	0.000820129	0.00309669
ZBTB32	-0.184888503	0.124979074	0.217432177
TYROBP	-0.140149246	0.193636626	0.308444789
TMEM159	-0.248649238	0.000245249	0.00106573
GABRA3	1.521695001	1.62E-08	1.83E-07
BRCA1	0.119123486	0.087414114	0.163328413
ERCC1	0.077061189	0.177457777	0.287970319
CD22	1.603391541	9.23E-25	1.55E-22
SEMA3B	0.165207911	0.141767543	0.240940386
MBTPS2	0.188242263	0.000343906	0.001436258
PRICKLE3	0.162748895	0.00463809	0.013983823
LTF	-1.201946173	1.17E-06	8.87E-06
EXTL3	-0.257434905	9.91E-05	0.000476189
NR1H4	0.973285382	0.004489873	0.013607705
ELOVL5	-0.249660526	0.000273721	0.001173899
ALOX5	-0.046165067	0.672695559	0.773272574
KDM5D	0.189274103	0.544172441	0.668030904
CALCOCO1	0.095059746	0.063830209	0.126337333
UBR7	-0.143163925	0.00048993	0.001961927
MAP4K5	0.057983508	0.264793254	0.391808621
EHD3	0.223160129	0.001882712	0.006384052
PSMC4	0.183602491	0.000905334	0.003375723
MAN2B2	-0.371404302	7.16E-10	1.06E-08
SLC7A14	1.305128859	1.05E-07	9.91E-07
CLDN11	0.547697325	5.89E-05	0.000299966
SLC25A39	-0.053152545	0.322594411	0.454556589
MVP	-0.108998289	0.147152151	0.24806853
NUB1	-0.001819531	0.966388124	0.978618098
PGM3	-0.195359767	1.61E-05	9.36E-05
RWDD2A	0.000982491	0.981168321	0.988176868
CLK1	-0.164637095	0.009293866	0.025322685
POLR3B	0.15688002	0.000156935	0.000717167
ANGEL1	0.195677854	7.93E-05	0.000390452
RNF14	-0.157577849	9.67E-06	5.93E-05
DNASE1L1	-0.06826054	0.214121546	0.333027093
DDX11	0.026918504	0.662764203	0.765864685
HEBP1	0.224758812	0.00010627	0.000507428
GPRC5A	0.179784482	0.165433229	0.272328831
MAMLD1	0.454152615	3.15E-05	0.000171162
CD6	-0.316720238	0.006614405	0.018981187
TACC3	0.476176897	1.20E-10	2.06E-09
UFL1	-0.096190939	0.097738164	0.178647093
POLA2	0.035607475	0.569217498	0.689551318
ZC3H3	0.046473666	0.450315859	0.582842503
CAPN1	0.002645034	0.963553526	0.977157381
ACP3	0.500210735	5.90E-07	4.76E-06
MDH1	0.081650854	0.023788082	0.055977967
SLC30A9	0.00360292	0.93720715	0.96000207
MTMR11	0.210217285	0.00504654	0.015045233
COX15	-0.132532594	0.000720679	0.002763166
CCDC88C	-0.196143877	0.000437695	0.001774419
YAF2	0.039919615	0.424592189	0.558303773
ZMYND11	0.03380215	0.444510024	0.577209489
WAS	-0.313176344	0.000899422	0.003358688
DPEP1	-1.637778893	4.38E-16	2.02E-14
BID	0.043199731	0.418077879	0.552247955
MATR3	0.335948199	0.000300415	0.001275123
NPC1L1	0.466402581	0.010199305	0.027397878
XYLT2	-0.075770283	0.107015111	0.192291727
RGPD5	-0.139021928	0.558092062
STMN4	1.23703617	7.45E-09	8.95E-08
NUDCD3	-0.043654332	0.254533963	0.380179051
ISL1	-0.04740491	0.805220774	0.869801033
CHDH	-0.640878704	5.80E-14	1.86E-12
IL20RA	-1.321568854	6.39E-24	9.75E-22
CLCA1	-0.184316831	0.620180955	0.731510018
CLCA4	-0.457222245	0.033433032	0.07414346
GLT8D1	-0.094089979	0.006333331	0.018274214
ATP2C1	-0.068707919	0.201232938	0.317636353
IGF1	-0.680592334	1.50E-05	8.83E-05
SLC38A5	0.523616727	0.001367511	0.004836271
RALBP1	0.339274645	1.54E-09	2.15E-08
RUFY3	0.268712915	7.89E-05	0.000388552
CNTN1	-0.385590867	0.011037301	0.029269662
SLC11A1	0.004027288	0.963801029	0.977259754
WWTR1	0.105096239	0.14047691	0.239156354
AGPS	-0.167106918	0.007219561	0.020476919
ZNF806	1.298853154	1.04E-06	7.97E-06
CXorf56	0.344592343	1.74E-17	1.05E-15
ATP1A2	-0.043861382	0.832959432	0.889298252
TTC27	0.165425447	0.000108805	0.000518298
ZNF582	0.14658219	0.108760869	0.194766693
VSIG2	-0.380907926	0.055064069	0.111745287
PHLDB1	0.261862926	1.39E-05	8.26E-05
MARCO	0.308669305	0.057331472	0.115508856
CYP24A1	-0.877030838	1.29E-05	7.69E-05
PRDM11	0.762814287	9.86E-27	2.01E-24
SYT13	1.34247778	1.64E-11	3.33E-10
SNAI2	-0.083252522	0.418309202	0.552457017
CD74	-0.558382072	4.14E-07	3.45E-06
HGF	0.029793227	0.823948703	0.882961394
ZRANB1	0.390151708	6.21E-09	7.57E-08
NCDN	0.004070594	0.957423131	0.973135738
ADGRA2	-0.294904934	0.005245712	0.015552108
CCT8L1P	-0.446244894	0.004347123	0.01323925
ZFP64	0.269767807	3.50E-08	3.67E-07
MNAT1	0.032055199	0.527461072	0.653702374
SAMD4A	0.573167462	6.27E-10	9.37E-09
RUNX3	0.167252773	0.165170099	0.27193492
MRE11	0.212589348	7.30E-06	4.61E-05
PLEKHB1	-0.283749624	0.00838314	0.023208859
SERPINB1	-0.390612194	1.07E-06	8.16E-06
CYP3A43	0.228108964	0.286874062	0.416305563
SLC7A9	0.495188571	5.98E-05	0.000304531
SPAST	0.282559147	3.15E-07	2.70E-06
NRXN3	0.242046332	0.136940559	0.234379484
OSBPL5	-0.244018765	0.000412542	0.001684394
AQR	-0.152447077	0.00020005	0.000889213
CPS1	1.651676791	5.30E-23	7.26E-21
C8B	-1.000959747	2.89E-05	0.000158276
FHL1	-0.05908392	0.631745961	0.740614704
RTF2	0.222207407	9.74E-10	1.41E-08
GABRA1	1.208777626	0.000457118	0.001843441
NLRP2	0.516699968	0.010216684	0.027434344
SLC45A4	0.127942099	0.072781747	0.140611567
RNF10	-0.085456758	0.005230665	0.015514396
ZNF839	-0.084287466	0.076117897	0.145922421
ZDHHC6	-0.181537486	1.50E-05	8.83E-05
GRAMD1B	0.202659063	0.057165138	0.115231762
RNH1	-0.062111308	0.222443022	0.342798045
NDUFS1	-0.048572398	0.212217478	0.330708463
RB1CC1	0.242240827	0.000117879	0.000556486
ERP44	-0.106171373	0.011371933	0.030024535
ALAS1	-0.084704576	0.136662749	0.233984078
BIRC3	-0.356619869	0.005028296	0.01500139
AKAP11	0.033919731	0.609763786	0.723338551
GLRX2	-0.3336057	1.20E-06	9.06E-06
SNAPC1	-0.023004924	0.65654118	0.760748832
DERA	-0.034052643	0.469001689	0.600123627
STRAP	0.224324403	1.05E-06	8.05E-06
ABCC2	-0.401852772	0.000574235	0.002259275
DEF6	-0.333532113	1.60E-05	9.33E-05
PLEKHO1	0.101774642	0.171309314	0.280174726
GCLM	-0.237737131	0.007288622	0.020640605
UBR2	0.08429139	0.019288925	0.046922272
EHD2	-0.123015946	0.173820807	0.283367152
DEPDC1	0.417177248	2.19E-06	1.56E-05
CCDC28A	-0.347806824	6.33E-13	1.68E-11
RRAGD	-0.117462767	0.252428363	0.377703219
HSF2	0.043887288	0.324539831	0.456461861
PHF20	0.130537466	0.000671403	0.002597635
HSD17B6	-0.01475339	0.904582362	0.938306907
NR1H3	-0.006126046	0.936106406	0.959249839
TYMP	-0.338298325	0.001483129	0.005187841
NCAPH2	-0.050750644	0.397357239	0.532253031
TOMM34	0.315152769	1.12E-10	1.94E-09
SEC63	-0.01069025	0.795981367	0.863822552
KPNA6	0.151887742	0.000851854	0.003201673
VIM	-0.332703116	0.002522664	0.008239151
RTEL1-TNFRSF6B	-0.051070433	0.514976793	0.642440413
FAS	0.002567707	0.975912613	0.984947473
RNASET2	-0.150027142	0.136093223	0.233188598
CD44	-0.317026689	0.000943339	0.003498198
KCNG1	0.381538021	0.023751927	0.05592249
AGPAT4	0.19722227	0.015524959	0.039112025
SLAMF7	-0.379378177	0.007372801	0.020845056
BTN3A1	-0.218920837	0.000606655	0.002371436
MIPEP	0.029008324	0.600897896	0.716432456
PRKCH	-0.402711112	5.79E-10	8.72E-09
INSRR	0.983797283	1.05E-08	1.22E-07
IFNGR1	-0.118368827	0.016300708	0.040768583
B4GALT7	-0.236524962	8.37E-05	0.000410081
SH2D2A	0.229733075	0.033695339	0.074613505
VRK2	0.152511298	0.005341733	0.015806096
TNFRSF1B	-0.117091327	0.187091946	0.300375668
VEZT	0.043664554	0.312762083	0.44425385
POU2F2	-0.125208158	0.205834738	0.323128071
BRD9	0.02296526	0.604164804	0.719084624
SNX1	-0.061478109	0.051331156	0.105372407
TBPL1	0.211610356	9.71E-07	7.49E-06
ARNTL2	0.426482352	1.75E-05	0.000100976
BCLAF1	0.029362902	0.511224919	0.639364173
SLC39A9	-0.158752246	4.63E-06	3.08E-05
ANK1	-0.394794023	0.010652929	0.028404734
IBSP	-0.076263202	0.680581485	0.779048447
TFB1M	-0.218630886	1.29E-07	1.20E-06
RABEP1	-0.170122387	1.29E-05	7.68E-05
HMGB3	0.147656921	0.014342121	0.036585943
NUP160	0.203377387	3.22E-05	0.000174261
BAK1	0.351938485	1.06E-08	1.24E-07
MUSK	0.343105887	0.060352158	0.120681044
IKZF2	-0.021289339	0.806336209	0.870554351
GRN	0.004641065	0.95008869	0.968526131
FAM13B	-0.027363068	0.581466501	0.700087067
ARHGAP31	-0.112032919	0.139583903	0.237976407
CENPQ	0.279594114	2.54E-05	0.00014065
SARS1	0.082700152	0.059306432	0.118907093
RANBP3	-0.17807889	4.16E-06	2.80E-05
ARID4A	-0.032367447	0.538169815	0.662894294
EIPR1	0.012509509	0.769108496	0.845451005
PNPLA6	-0.162490115	0.008721361	0.023998138
IFT88	-0.186431629	0.002037618	0.006834596
ALG1	-0.121874651	0.01842529	0.04516465
ZCCHC8	0.010253514	0.82322319	0.88239663
ABCF2	0.149690989	8.02E-05	0.000394612
CHPF2	-0.061043629	0.201597046	0.318073043
LRRC7	0.884305504	1.86E-12	4.54E-11
FUT8	0.336999753	8.16E-06	5.11E-05
UBA6	0.012508728	0.809598021	0.872960712
GAB2	0.598902866	2.08E-14	7.26E-13
ATP6V0A1	-0.169618204	0.000974898	0.003596891
PIAS1	-0.030752049	0.413250892	0.547656673
SLC4A7	0.0137544	0.872433386	0.916304916
APBA2	-0.32205813	0.001198621	0.00431217
MAP2K3	-0.049695043	0.350979668	0.484319016
EFCAB1	-0.994716757	6.29E-07	5.04E-06
TMSB10	-0.191920003	0.022385051	0.053202062
ASTE1	0.16355188	2.44E-05	0.000135526
RNF19A	0.11134104	0.065919184	0.129804145
PEX3	0.090320089	0.071805815	0.139122462
GABARAPL2	-0.06524257	0.099284396	0.18091954
MYOC	-0.18957278	0.240111081	0.363432233
SH3YL1	-0.403930148	1.49E-08	1.69E-07
FAM136A	0.140545383	0.000816601	0.003085408
VCL	0.371780069	6.95E-10	1.03E-08
DEPDC1B	0.494912222	2.02E-08	2.22E-07
DAPK2	-0.508979643	2.09E-08	2.29E-07
NSMAF	0.049245065	0.198795896	0.314733758
ADSS2	0.011817204	0.814362322	0.876038464
STAP1	-0.22127412	0.147204457	0.248135796
TIMP2	0.490606042	6.01E-09	7.35E-08
RFC1	0.145775196	0.001173001	0.004229126
TBC1D23	0.086924468	0.095967493	0.175989523
CUL3	0.158785856	0.000109597	0.000521758
MYOM2	-0.333167274	0.003026035	0.009673881
OTC	0.817994808	0.001139748	0.004120003
CYP46A1	0.162811591	0.183708841	0.296108573
ZZZ3	0.142727742	0.000597949	0.00234198
SLC18A1	0.383288677	0.063173946	0.125286329
USP2	-0.336923052	0.002624084	0.008525131
CASR	2.0790208	7.88E-20	7.02E-18
TUBG2	-0.110108329	0.070857141	0.137684475
RPL26L1	0.023578668	0.644590776	0.750871495
FLT4	-0.301520557	0.000285735	0.00122032
NSUN2	0.123777963	0.001828296	0.006220622
FBXO42	-0.029793204	0.399112807	0.534079757
MFAP3	0.103471202	0.195558687	0.310791993
MRI1	0.114664693	0.04104084	0.087738226
METTL1	0.080824377	0.112679346	0.200310493
HOXC8	-0.032411354	0.898972799	0.934207862
AGA	-0.319055068	2.02E-08	2.23E-07
PI4K2B	-0.200889695	0.000902669	0.003367353
BOD1L1	0.104531136	0.091891402	0.169958552
MAT2B	0.067794812	0.125004372	0.217466733
TLL1	0.671548292	2.55E-06	1.79E-05
EDC4	-0.053712431	0.411281208	0.545950559
TRIO	0.206622421	0.001818908	0.006192367
VCAN	0.562195053	1.17E-05	7.03E-05
CLEC16A	0.079182639	0.071099217	0.138014098
MSR1	0.168639436	0.094100931	0.173217582
CDH1	-0.147158665	0.035391489	0.077745462
MTREX	0.011694805	0.791270926	0.860747583
DNAH5	-1.088909612	1.48E-13	4.37E-12
ZFYVE16	-0.11715725	0.032526001	0.072546147
RIPOR1	-0.104231308	0.052407035	0.107217891
C6	-1.523031973	4.68E-08	4.76E-07
RAI14	0.200842493	0.007285637	0.020635074
SOX30	0.372436207	0.007696002	0.02160919
PNKP	-0.110000903	0.039917128	0.085830298
BEST2	0.668237983	0.000172029	0.000778853
PHLPP2	0.096611715	0.115406045	0.204087714
SPDL1	0.386480112	2.09E-08	2.30E-07
STAU2	0.219665523	4.20E-05	0.000222292
SLC66A1	-0.024690228	0.657760138	0.761688144
CTNS	0.078959448	0.118637331	0.208630872
RTN4R	0.257786413	0.013200968	0.034076878
PHF23	0.031687574	0.416995039	0.551267331
CDH10	0.765835323	0.00032819	0.001378103
INPP4A	0.246554421	1.58E-06	1.16E-05
RAB27B	-0.225380806	0.078041817	0.149060727
PSMA4	0.060283458	0.219204384	0.338969126
MYO16	0.798163055	6.06E-05	0.000307691
LSG1	0.26181945	5.05E-10	7.71E-09
PARP3	-0.042745946	0.543047965	0.666998404
TNC	0.084987832	0.503414077	0.632214633
THAP3	-0.051734638	0.317253963	0.449008235
RIPOR3	0.57219096	9.80E-08	9.33E-07
TDP1	0.016155543	0.670653877	0.771905037
AIFM2	-0.258773465	0.00096432	0.003564108
C2orf83	0.312985058	0.255975141	0.381782271
SPATA7	-0.080113571	0.172868987	0.282160382
MED17	0.130897416	0.000741326	0.00283391
RETSAT	-0.376741701	6.97E-12	1.54E-10
CAPG	0.479506253	1.92E-08	2.13E-07
AP2S1	-0.156492528	0.011921676	0.031260606
USH2A	-0.016032954	0.913100494	0.944131847
ZPBP	1.52404223	1.87E-09	2.55E-08
TG	0.180107219	0.1563548	0.260259577
ADAM28	-0.855393018	2.08E-12	5.03E-11
BARX2	1.297876444	7.24E-13	1.90E-11
DCUN1D1	0.306407184	2.19E-08	2.39E-07
JADE2	-0.052064681	0.512353087	0.640272233
ZIC2	0.28088179	0.284702623	0.413784773
LCP2	-0.261073816	0.00612917	0.017776149
TRIT1	0.387501655	3.32E-17	1.90E-15
ADRB1	0.576156929	0.000417128	0.001700865
GUCA2B	1.840736811	1.75E-06	1.28E-05
CUL7	0.278772952	3.50E-07	2.97E-06
CTNNA1	-0.046864997	0.261013699	0.387639973
PHKA2	-0.036574743	0.493557809	0.62308325
CNTLN	-0.004221304	0.953803015	0.970684066
EPHA3	-0.766951353	4.87E-06	3.22E-05
HSPA5	0.092746847	0.075830264	0.145447674
DSG2	0.140205131	0.049494253	0.102236334
GEMIN8	-0.432759682	7.43E-16	3.28E-14
OFD1	-0.180206893	0.00243248	0.007979756
GPM6B	-0.014127662	0.879328194	0.920649924
MAGEC2	4.502798706	1.42E-20	1.40E-18
PREX2	-0.206440125	0.077936969	0.148903117
WDR37	0.035634903	0.439403164	0.572361426
YTHDC2	-0.284912536	1.12E-05	6.78E-05
CTPS2	0.08006757	0.093866042	0.172832918
ATP6V1H	0.099104966	0.025713019	0.059800742
POLR2B	0.136728644	0.005009338	0.014952149
FAM214A	-0.426520146	1.34E-10	2.28E-09
ARAP2	0.071740667	0.432921221	0.566277998
TPR	0.008259107	0.853564943	0.903161854
CP	-0.320472377	0.043288951	0.09164229
KIAA0556	-0.182251034	0.001592458	0.005520598
DTNBP1	0.078825986	0.0722189	0.139692804
XK	-0.001208692	0.992586387	0.995322909
ANO2	0.958410736	9.25E-16	4.03E-14
C12orf4	-0.009286024	0.839609825	0.893600186
SCML1	-0.58845184	3.51E-07	2.97E-06
WWC3	0.058607251	0.377508875	0.512408488
ARHGAP6	0.802302611	2.55E-11	4.98E-10
FAM184B	0.372259131	6.00E-05	0.000305253
MAP4	0.006640036	0.857086395	0.90556869
GOPC	0.076344483	0.083381971	0.157216858
ROS1	-0.275465885	0.201391284	0.317836136
USP28	0.198419796	0.000243226	0.001057282
HDAC9	-0.034633991	0.732608042	0.819152512
TSPAN17	0.179289223	0.000133436	0.000621204
NOP16	0.030652529	0.572239758	0.691997596
CC2D2A	-0.462774797	2.23E-07	1.97E-06
RRM2B	-0.006554181	0.921985336	0.949955224
ZNF800	-0.109810259	0.015273229	0.038592057
TNFRSF17	-0.705178983	0.000275205	0.001179758
SNX29	-0.040695683	0.510193763	0.638433476
LMO3	1.170585718	1.21E-07	1.13E-06
MRPS10	0.139864748	0.000285127	0.001217985
GUCA1A	1.707213299	2.32E-15	9.46E-14
RSF1	0.318335242	6.25E-10	9.36E-09
VPS13D	-0.094401521	0.08702326	0.162719708
CELF2	-0.350219344	0.001492913	0.005215225
FAM120A	-0.364141851	1.23E-16	6.28E-15
R3HDM1	0.107142035	0.008359996	0.023161003
COL9A2	0.890385688	6.07E-14	1.94E-12
KITLG	0.19935165	0.106566095	0.191639828
ERCC8	0.069393598	0.082078087	0.155225109
ADAMTS6	-0.362247935	0.025992925	0.060283517
H6PD	-0.005003459	0.922518431	0.950333176
VAMP3	0.070199942	0.056335068	0.113839575
PER3	0.157817251	0.086426029	0.161823622
UTS2	-0.4710677	0.028541863	0.065130405
TNFRSF9	0.014806668	0.900542224	0.935336179
EPN3	-0.233521817	0.012338415	0.032163646
LTBP1	0.042716103	0.650811611	0.756070785
RCN1	-0.051357046	0.423323428	0.557184822
ELN	1.162600991	3.01E-15	1.21E-13
RFC2	0.126295982	0.012992673	0.033630319
ARID1B	0.086702035	0.054986666	0.111616515
CLPTM1L	0.008710365	0.861337452	0.908788241
NEDD4L	-0.067414373	0.2433599	0.36704438
FOXP3	-0.301086565	0.001305795	0.004646348
PPP1R3F	0.154374934	0.074300757	0.142973211
HEXB	-0.251447602	2.29E-05	0.000127964
PTCD2	0.037107212	0.344153636	0.477121274
NEXMIF	-0.340572896	0.027722143	0.063546191
JKAMP	-0.124262979	0.003223076	0.010205317
DKK3	0.229203151	0.027180519	0.062480057
ARHGEF5	0.088035849	0.120151237	0.210746639
NFE2L3	0.426597331	1.84E-05	0.000105773
MCUR1	0.256703651	2.58E-09	3.42E-08
LIMA1	-0.017747321	0.773233522	0.848140754
LETMD1	-0.095492839	0.023044434	0.05450199
SLC4A8	-0.17244883	0.115743703	0.204530327
LAMC3	0.092039838	0.467576921	0.598807457
PTGER3	-0.619029632	0.000536868	0.002129431
TNIP3	-0.587708939	0.000110273	0.000524728
MAPK9	-0.110245014	0.001000229	0.003675621
COL23A1	0.744458559	5.18E-06	3.40E-05
BCAR1	-0.112717561	0.062033231	0.123427867
FAM160A2	-0.144015036	0.000137467	0.000637375
HERPUD1	-0.431504384	1.80E-10	2.98E-09
HOMER3	0.206484782	0.00685405	0.019566442
RAD51	0.337069008	3.04E-06	2.10E-05
POLQ	0.492787849	1.64E-09	2.27E-08
PIK3CB	-0.03944925	0.453532438	0.585826154
CYBA	-0.458834128	5.98E-08	5.93E-07
THOC3	0.238695366	0.000469948	0.001889236
HEBP2	-0.311614057	1.78E-08	1.98E-07
MPHOSPH9	-0.035606647	0.559612633	0.681468257
PLEKHA5	-0.520466901	9.85E-12	2.11E-10
PRSS8	-0.087330108	0.32020974	0.45196047
SIKE1	0.308305288	1.05E-13	3.19E-12
RRP12	0.098823512	0.040648955	0.087094952
FNIP2	-0.224729737	0.002493583	0.008158798
MSMO1	-0.147393612	0.016428587	0.041031983
TTC17	0.118725079	0.008434388	0.023327212
ALX4	-0.280477424	0.214483869	0.333473949
FSTL4	-0.120199645	0.496614908	0.62573002
FOXN3	-0.156445404	0.004898459	0.01466276
METTL24	0.910399307	8.85E-09	1.05E-07
AKR7A2	-0.010448229	0.84653371	0.898357263
MRTO4	0.174411313	0.000462949	0.001864705
NNAT	0.298187985	0.007533833	0.021225346
USE1	0.140357245	0.032312868	0.072123042
MCF2L2	0.360515654	0.0008323	0.003137612
NRIP2	-0.338021051	3.73E-06	2.54E-05
LAMA3	-0.067139687	0.565896703	0.686880687
AP5M1	0.006566128	0.880856381	0.921653406
ANAPC4	-0.914458943	8.38E-19	6.15E-17
KCNQ1	-0.325554156	0.004047956	0.012432232
TRAPPC3	0.040541365	0.276917456	0.405252222
THRAP3	0.136951191	6.83E-06	4.35E-05
PHPT1	-0.256265586	0.000272271	0.001168305
ENTPD2	-0.446825908	0.000179902	0.000810053
LY75	-0.431705946	3.93E-05	0.000208794
ARID4B	-0.12520872	0.027528515	0.063156624
OPN3	0.36942544	0.000274715	0.001177784
SDCCAG8	-0.098679072	0.028412476	0.064864749
PTPRN	1.004542636	9.22E-12	1.99E-10
HHAT	-0.301556678	0.000171752	0.000777772
KIF1B	0.387655883	3.76E-14	1.26E-12
FOXC1	-0.074765269	0.610116685	0.723606998
TBC1D22A	-0.063828431	0.163434763	0.269677133
SYNE2	-0.128414396	0.101653249	0.184521793
PLEKHH1	-0.351027332	7.71E-07	6.07E-06
ATP9A	0.042917187	0.502136906	0.631066294
SPO11	0.238116288	0.747925396
CBLN4	-0.059686061	0.725861452	0.813984432
CHRDL2	-0.158281268	0.420556164	0.55469918
FAM168A	0.030252639	0.512138067	0.640091744
RELT	0.334856238	2.14E-07	1.90E-06
GALC	-0.085979014	0.257455647	0.383518615
NOP58	0.173698704	0.000248605	0.001077385
SZRD1	0.042083837	0.273588389	0.401643777
KCNH2	0.470610255	0.002204604	0.00731862
CUL1	0.04075515	0.199660049	0.315813198
FAM114A2	-0.132351475	0.00165443	0.005704247
CYFIP2	0.421417592	5.94E-07	4.79E-06
TAB2	0.320810859	8.35E-13	2.17E-11
GINM1	0.092339441	0.035070694	0.077177281
EIF2AK2	0.471866273	7.28E-16	3.21E-14
USP36	0.22906794	2.40E-08	2.59E-07
KMT2C	-0.195562669	0.003826906	0.011837846
MCOLN3	0.904720162	3.83E-09	4.87E-08
CCDC85A	-0.7582288	4.18E-06	2.81E-05
PUM2	0.005876459	0.867420632	0.912823379
MRPL43	-0.181331586	0.000180388	0.000811918
ITIH4	-0.273056318	0.005745407	0.016835212
ITIH1	-0.29987655	0.093679586	0.17259286
HPF1	0.061983618	0.23393201	0.356181671
ZFR	0.105837496	0.007780589	0.021796217
ZNF280C	0.155755915	0.018144046	0.04457357
NPFFR2	2.967406458	3.43E-19	2.72E-17
PHF21B	-0.195304967	0.29526659	0.425214923
TRAF1	-0.447310822	3.83E-09	4.86E-08
RC3H2	0.12318831	0.01146342	0.030245906
IL17RB	-0.391513012	2.31E-05	0.000129282
TRAF3IP2	-0.659470367	5.37E-14	1.74E-12
GYG2	0.121080063	0.16216436	0.268023046
DCBLD2	0.090673671	0.21052673	0.328649731
SERPINB3	-0.851586467	0.003070372	0.009789807
SOAT1	-0.47868868	3.96E-12	9.15E-11
PKP2	0.04239846	0.590751388	0.70787901
MSH4	0.108550276	0.492269085	0.621907665
F7	-0.100504217	0.577763927	0.696782425
GDI2	0.115251467	0.007784611	0.02180443
PRDM1	-0.231991061	0.016536543	0.041273272
ATG5	0.063247081	0.150831235	0.253103639
TMCC3	0.629989249	2.04E-10	3.35E-09
PITHD1	0.087311821	0.017374734	0.042997817
MTA3	-0.013051327	0.740702089	0.825250623
USP13	0.169285106	0.029077798	0.066123316
ATP11B	0.296658438	0.002144461	0.007150408
LAMC2	-0.122320982	0.244954646	0.368907266
CDK14	-0.016350898	0.865902968	0.911801865
SEC61A1	-0.167580482	3.33E-05	0.000180041
PPP1R12A	0.058036498	0.272302514	0.400270089
RASGRF1	-1.097375632	9.70E-09	1.14E-07
CAMK2B	0.333066767	0.033711724	0.074642652
CROCC	-0.267462529	0.00027141	0.001165112
POLR3E	0.100352548	0.01776418	0.043799043
ATP2B4	0.029065442	0.678161019	0.777147315
ZC3H11A	-0.064521095	0.182034322	0.293877883
RIOK2	0.039806255	0.302668243	0.433517837
YIPF1	-0.164044811	6.20E-05	0.000314194
NDC1	0.366659373	1.53E-11	3.13E-10
DGKG	0.930101735	1.65E-12	4.08E-11
FLYWCH1	-0.303234398	5.03E-08	5.08E-07
UNKL	0.118917727	0.058950605	0.118294451
TBXAS1	-0.215810001	0.021401742	0.051202674
PARP12	0.134324655	0.066227392	0.130326908
ALDH18A1	-0.294507963	7.96E-09	9.50E-08
TARBP1	-0.418914914	8.57E-09	1.02E-07
GATB	0.104223122	0.018512084	0.045344067
MXD1	0.057256161	0.431594444	0.56505979
CDK17	0.081398964	0.175582641	0.285448432
DNAJC25	-0.204618608	5.29E-05	0.000272196
SLC2A3	0.199672203	0.024290107	0.05699841
PSD	0.35747811	0.000501929	0.002003559
CTDP1	-0.002666692	0.952652734	0.969789915
YBX3	0.234878717	0.000102007	0.000489176
STYK1	-0.373133201	0.002220959	0.007364968
WNK1	0.02217934	0.673849544	0.774024472
RPS17P5	0.061752572	0.688533813	0.785233149
CCAR1	0.010373511	0.802107749	0.867807705
OGFR	0.032547313	0.577060792	0.696123296
GNA15	-0.26491578	0.007873731	0.022015523
CREB3L3	0.457434907	0.022884651	0.054189867
PIGV	-0.195886113	0.00011152	0.000529654
PTPRU	0.488474941	5.29E-07	4.31E-06
SNRNP40	0.317458503	1.65E-10	2.76E-09
RIMBP2	-0.429751939	0.031010002	0.069693247
COL11A1	0.795952444	2.38E-05	0.00013257
QSER1	0.160350461	0.005633941	0.016560747
MPC1	-0.145393804	0.016001061	0.040139598
ACAA1	-0.157785752	0.00120026	0.0043169
BCAT1	0.598160941	5.12E-05	0.000264193
HDAC7	0.395576521	3.13E-15	1.25E-13
LZTS1	0.4435199	0.0001892	0.000846532
PRDM6	0.151996203	0.292946465	0.422863049
WNT8A	0.550263535	0.023548082	0.055520963
SPAG4	-0.673076553	1.26E-11	2.64E-10
NCKAP1	0.067254918	0.21578627	0.334874243
MRPS35	0.029055039	0.519614608	0.646633308
GUCY1B1	0.109835734	0.225447447	0.346307568
SFSWAP	-0.038062095	0.324675122	0.456587942
TNK2	0.304224922	6.76E-06	4.31E-05
MON2	-0.126680313	0.022581903	0.053590328
CDH3	0.739290498	5.10E-11	9.40E-10
ARSF	-1.577805081	2.60E-12	6.19E-11
GPBP1	0.067004877	0.045204441	0.095005736
DGAT2	0.560733488	1.02E-07	9.68E-07
ZNF112	0.029537645	0.623881002	0.73451005
CS	0.039637917	0.289129301	0.418788437
LTK	-0.066017313	0.682422152	0.780376365
MRPS24	0.067369971	0.388624997	0.523536062
ELMO2	0.15073195	0.000851188	0.003199774
WAPL	0.113995041	0.014334433	0.03657373
VMP1	0.170604606	0.018051812	0.04438241
APPBP2	0.107777797	0.025099781	0.058585679
POLD1	0.261127058	0.000109312	0.000520465
SEZ6	0.920712388	5.14E-08	5.18E-07
EIF4B	0.086482572	0.071516977	0.138687456
SLC6A16	0.035852696	0.723787614	0.81256015
BICRA	-0.107091128	0.01989502	0.04813909
SPHK2	0.262731968	3.94E-06	2.66E-05
RPL18	-0.260501862	0.000325678	0.001368846
CA11	0.523120751	9.40E-08	8.98E-07
ISOC2	0.043020452	0.538978875	0.663671236
U2AF2	0.110642708	0.002007897	0.006749619
EPN1	0.003203156	0.953076661	0.970073373
MED29	0.139843746	0.008245301	0.022905585
AHRR	0.156837139	0.179066871	0.290016857
GSC2	-0.379989737	0.324850833	0.456738719
ZNF275	0.034658281	0.52916449	0.655040724
MTMR1	0.096757405	0.014696581	0.037363889
GPC1	0.448064853	8.53E-09	1.01E-07
ADCK1	-0.165884394	0.001080887	0.0039346
HAGH	-0.247037301	2.25E-05	0.000125988
RNF4	0.032006633	0.378343048	0.513192535
CASP8	0.05896911	0.248804865	0.373426636
LIMCH1	0.205480954	0.01860464	0.045534535
INTS13	0.238629136	5.98E-06	3.86E-05
TM7SF3	-0.107019411	0.072041385	0.139430329
DLX3	0.918643395	1.72E-08	1.92E-07
SPA17	-0.681800453	3.77E-12	8.73E-11
TSPAN32	0.311186502	0.006357995	0.018332158
CCN5	-1.114098488	2.02E-13	5.81E-12
DMRT3	0.884662985	0.000278719	0.001192904
ST3GAL6	-0.082961777	0.469949797	0.600978758
ATP2C2	-1.101378479	4.42E-19	3.37E-17
NGFR	0.069923519	0.665526146	0.768013718
CDON	0.925884899	1.15E-22	1.51E-20
TAF2	0.245061701	0.000206653	0.000915207
HIPK2	0.294067534	0.000482207	0.001934681
TNPO3	-0.005469816	0.877344345	0.91937323
BORCS8-MEF2B	0.312708082	0.001789015	0.0061015
RFXANK	0.137000432	0.075509178	0.144967689
TMEM161A	0.023914602	0.66862891	0.770305634
LPAR2	-0.063152734	0.369623571	0.50381054
CTSA	-0.025830591	0.684618917	0.782039065
SUGP2	0.160638372	0.001101687	0.004000853
SLC12A2	-0.522246978	1.53E-08	1.72E-07
SNX24	0.137241414	0.006479054	0.018643589
EYA2	-0.517767575	0.000125072	0.000585947
CNN2	-0.028454954	0.713202086	0.804718189
ABCA7	-0.529785403	4.55E-08	4.65E-07
SNCAIP	-0.224849906	0.048056628	0.099818171
DDX20	0.151475464	4.29E-05	0.000226186
BTBD1	0.05561803	0.21637364	0.335564499
FAR2	0.290651338	0.010749531	0.028614204
BCAS1	-0.289221417	0.067014682	0.131534066
POU1F1	0.238198305	0.208304359	0.326071015
CHI3L2	-0.766456574	6.26E-06	4.02E-05
SBNO2	-0.190879379	0.00312561	0.009938212
PMS1	0.033057454	0.496486628	0.625636965
HMG20B	-0.462351644	5.78E-14	1.86E-12
CALCRL	0.019503146	0.861417419	0.90882468
TAF11	0.238916931	1.23E-10	2.10E-09
ANKS1A	0.266066168	8.36E-06	5.22E-05
AP3D1	-0.268447547	5.96E-09	7.30E-08
ZNF76	-0.101885172	0.034661512	0.076439887
SLC9A3R2	-0.381563407	3.14E-06	2.16E-05
NTHL1	-0.034844948	0.663914108	0.766816962
UHRF1BP1	0.192095326	0.000117998	0.000556982
GNAI3	0.209903861	1.13E-09	1.61E-08
IPO5	0.095340951	0.024359398	0.057137548
OAT	-0.117046238	0.15189282	0.254374742
WDR3	0.293503367	5.59E-08	5.58E-07
PKN2	0.113749384	0.043996459	0.092904118
WDR18	-0.094903908	0.160471284	0.265729713
TRAM2	0.460805689	2.29E-17	1.35E-15
NTN1	-0.306395833	0.00905243	0.024757583
GLP2R	-0.267127396	0.155628876	0.259342567
MCM10	0.548536376	2.08E-10	3.40E-09
DGKA	-0.352151956	1.47E-06	1.09E-05
ERBB3	0.10030468	0.156020263	0.25985408
ROPN1	-0.160222544	0.413882479	0.548184993
ANKRD44	-0.184969657	0.02430301	0.057025343
KARS1	-0.067077673	0.131847202	0.227265259
ADAT1	-0.188254436	0.0001337	0.000622132
PDIA5	-0.47216216	8.58E-12	1.86E-10
TBC1D22B	0.035211852	0.266292001	0.393589591
NDUFB4	-0.147684949	0.000914964	0.003405605
SPEN	0.070771471	0.167555053	0.275057858
MYLK	-0.148485764	0.158298401	0.262893226
ZC3H15	0.219805328	6.30E-09	7.66E-08
MAP2K4	-0.07138067	0.090493855	0.167906536
PACC1	0.199063966	0.000104283	0.000499194
SNAP91	-0.507766474	0.012573334	0.032695218
SLK	-0.054731701	0.338774075	0.471427497
CYB5R4	-0.175779396	0.002963175	0.009500255
COL17A1	-0.535031501	0.001907325	0.006457115
GSTO2	-0.04204251	0.661071716	0.764549295
SEC61A2	0.335185771	3.22E-09	4.16E-08
PRKCQ	0.166906073	0.221863708	0.342155691
TLE2	-0.008376501	0.938879267	0.961173476
ASB1	0.369085154	4.35E-15	1.71E-13
FAM107B	-0.232738698	0.000562348	0.002217502
ME1	0.050127505	0.7401466	0.824838454
TBC1D1	-0.167275966	0.001823584	0.006206792
CDK13	0.062438884	0.09176214	0.16977948
MTHFD2	0.398307783	1.99E-08	2.20E-07
SLC9A7	0.319643852	3.08E-05	0.000167459
FOXJ2	-0.08350932	0.116213737	0.205071909
YBX1	0.279838857	3.53E-09	4.53E-08
PDE4A	-0.106417807	0.270878969	0.398778257
PPP2R5A	-0.156664518	0.005881935	0.017176143
CTNNA2	-0.027182055	0.880608713	0.921490663
ELAVL1	0.038378511	0.172540567	0.281739268
TIE1	-0.156410759	0.063447543	0.125722984
DIP2B	0.041473959	0.415220674	0.54956397
SMARCD1	0.306064015	5.50E-20	4.99E-18
KDM4A	0.177726341	3.93E-05	0.00020877
NFYC	0.061644143	0.127688358	0.221241329
ZMYND12	-0.60380202	4.93E-08	5.00E-07
SLC9A3	-0.235991127	0.122663975	0.214242939
NGEF	-0.076155344	0.468649051	0.599775442
ASPM	0.406425243	9.81E-06	6.01E-05
CD84	-0.180951817	0.094501096	0.17381824
ELOVL1	0.014817961	0.757648139	0.837507443
SPI1	-0.186728084	0.067732247	0.132695107
ZNRD1	0.139860652	0.011708097	0.030785308
MPPED2	-0.188571684	0.138470108	0.236451155
CLDN18	0.499861184	0.003862447	0.011935292
ZBTB11	0.089413828	0.06673537	0.131120925
ATXN3	0.047074283	0.241550752	0.365072682
GOLGA5	-0.046134486	0.277742866	0.406088814
FGFR2	0.309367092	0.007199561	0.020434678
LRRC40	0.149535681	0.023503168	0.055434665
ISOC1	-0.298466403	1.46E-06	1.08E-05
EML1	0.232256254	0.012205766	0.031884337
TRMT11	0.199243522	0.00151477	0.005280512
THUMPD1	-0.222050814	8.29E-06	5.18E-05
MSANTD3	-0.0068317	0.887366807	0.926309354
KIF26A	-0.086481182	0.553426654	0.675879057
ATG2B	-0.029678494	0.5631747	0.684603991
ARFGEF1	0.129023634	0.044574139	0.093883048
ACSM2B	1.110730041	4.15E-05	0.000219845
ZFAT	0.385336229	4.90E-10	7.50E-09
MTFR1	0.0111317	0.856652322	0.90534915
STAG3	0.050773165	0.619562171	0.730995662
FECH	-0.1770272	0.002626576	0.008532532
MYO9A	0.003216117	0.957472827	0.973161526
DDX3Y	0.501815463	0.060364965	0.120693327
PFKP	-0.304531554	0.000184865	0.000829642
IDI1	-0.014070645	0.81769085	0.877995578
SP100	0.142546976	0.018389623	0.045091036
KLF6	0.22410855	0.005129259	0.015240738
PLPP1	-0.469693174	1.77E-11	3.57E-10
NEO1	0.263139611	0.001335013	0.004735993
TRAM1	0.037218637	0.499398139	0.628255829
PHKA1	-0.015206315	0.791588482	0.861013609
TNFRSF1A	-0.051187276	0.287448041	0.416866343
CACNB1	0.073799706	0.388147663	0.523018226
EVI5	-0.007347569	0.893554427	0.930655986
STOML1	-0.326449112	1.36E-08	1.54E-07
PKM	0.048829889	0.415089836	0.549474896
DHX29	-0.025856971	0.539676325	0.664202968
DNTTIP2	0.175888672	4.33E-05	0.000228241
METTL22	0.076848346	0.087937418	0.164106916
TP53BP1	0.040309718	0.524538697	0.651282275
TRO	1.991472265	1.19E-47	1.45E-44
RRP15	0.154887574	0.004387928	0.013342194
RHOA	-0.000653101	0.985172833	0.990680314
DHX8	0.012548423	0.75265039	0.833749576
PMS2P4	0.197509601	0.001237179	0.004432154
PRKCZ	-0.020981327	0.711818128	0.803587232
ZFY	-0.012939867	0.978335609
IARS2	-0.086341958	0.113200683	0.201085385
SYT1	0.393785322	0.019023682	0.046361606
NAV3	0.502246718	0.000217908	0.000959319
IDH3G	-0.251976608	0.000214364	0.000945483
ROGDI	-0.208060108	0.001278659	0.004561558
PDZD4	0.701099516	1.53E-06	1.13E-05
ATP2B3	0.319371818	0.124695901	0.21705518
ROCK1	0.17222898	0.003068181	0.009786721
CBFB	-0.144012738	0.004428334	0.013453809
PDK3	-0.272512267	7.26E-05	0.000361422
HYAL2	0.087177117	0.145377449	0.245708278
HDAC4	0.358745925	1.61E-07	1.46E-06
RASSF1	-0.11778275	0.013775945	0.035349011
FGFR3	1.057148912	2.12E-11	4.21E-10
IFI35	0.111056408	0.246562909	0.370854715
HEATR6	0.246331344	7.10E-08	6.95E-07
COASY	-0.223959225	3.77E-06	2.56E-05
PLEKHH3	-0.092728326	0.096364638	0.176612589
MEF2A	-0.026131673	0.641042508	0.747935892
OTUD5	0.142793951	0.001919371	0.006492399
TFE3	0.108869388	0.011777833	0.030950365
TBC1D25	0.020261342	0.6723394	0.773111084
ACSL4	-0.340391968	0.001185635	0.004269673
INPP5A	0.271618081	5.57E-08	5.55E-07
GPKOW	0.065291908	0.197759037	0.313476281
GRIPAP1	0.081464014	0.04285761	0.090892665
FTSJ1	-0.06307556	0.178869635	0.289773769
PRR11	0.489313607	3.69E-10	5.78E-09
REEP1	-0.441327613	0.000158846	0.000725156
ATP11A	-0.313455387	0.001024358	0.003755479
POLR1A	0.162801137	5.86E-05	0.00029892
LAPTM4A	0.109966259	0.008870843	0.024345835
TTC7A	-0.239019463	0.000168668	0.000765281
IP6K2	-0.009328084	0.822473972	0.881888785
STON1-GTF2A1L	0.530310295	0.017144986	0.042529217
SRBD1	0.016591339	0.719341551	0.809156869
KIF2A	-0.018922667	0.769851983	0.845809754
RASGRP2	-0.267220615	0.007107571	0.020199375
PSME4	0.123468563	0.007805297	0.021854721
IFT80	-0.056313499	0.393824928	0.528897567
SIRT2	-0.026547449	0.580032281	0.698843964
ERLEC1	-0.222185039	4.20E-07	3.49E-06
PPP2R5B	-0.284278593	4.12E-07	3.43E-06
PYGM	1.27038342	9.24E-25	1.55E-22
PAGE1	0.18706232	0.505614083	0.634499525
PITX1	-0.385132272	0.012353758	0.03219735
TRPC7	0.597190095	0.04804693	0.09980404
MAST4	-0.577354834	2.89E-13	8.12E-12
ADGRF5	-0.12159613	0.118349882	0.208244368
SDK2	0.586653001	9.69E-05	0.000467184
ADAM7	0.995918612	0.011191004	0.029610535
NUP133	0.094204631	0.04637654	0.096983011
NUCKS1	0.149759111	0.007028657	0.020003523
VPS35	-0.034848261	0.459437244	0.591353259
DNAJA2	-0.086672778	0.016982478	0.042191502
BCL3	-0.251015553	0.001696481	0.005831142
KCNAB2	-0.287530787	0.000410073	0.001675683
ABCC9	-0.385257907	0.000550198	0.002176044
GAL	0.696993432	0.000192221	0.000858226
CLEC2D	-0.24011844	0.002948369	0.00945733
FUNDC1	0.202149647	4.27E-05	0.000225272
MAOB	-0.611805033	1.24E-06	9.32E-06
RORA	-0.27370936	0.005676446	0.016668545
DRD4	-0.11567429	0.316953137	0.448630087
TGFBR3	-0.12601462	0.269029876	0.39675684
PLA2G10	-1.188753013	6.85E-17	3.68E-15
HES2	-0.283585565	0.042528849	0.090329496
ATP1B3	-0.028040857	0.591450745	0.708439472
NEDD4	-0.147611415	0.091820746	0.16984864
PIGB	-0.299546617	7.43E-09	8.93E-08
MAPK6	-0.199415208	0.000246054	0.001068301
GNB5	-0.577542019	3.73E-14	1.26E-12
RAB27A	-0.0935079	0.144524835	0.244515143
HDHD5	0.052959575	0.297839252	0.428133893
UFD1	0.031827532	0.464346994	0.595717915
LRP6	0.242868822	1.68E-05	9.76E-05
GUCY2C	-0.182844263	0.167592736	0.275097144
SCT	-0.034115715	0.815173414	0.876450913
PHRF1	0.038520514	0.351466949	0.484768166
ELP1	-0.079654156	0.069429579	0.135311414
NUCB2	-0.695566886	6.41E-22	7.71E-20
PFN2	0.244678816	0.001527748	0.005320191
PTPN3	-0.560175404	9.34E-15	3.44E-13
SPTB	0.87379752	2.76E-13	7.77E-12
DAPP1	-0.250722274	0.029956775	0.067779258
FGF10	-0.074058949	0.739818587	0.824679646
SLC44A1	-0.329379327	3.19E-10	5.06E-09
TMEM260	-0.165567031	0.002421973	0.00794724
SMG6	-0.016738084	0.811706103	0.874597369
EXOC5	0.035972735	0.526222551	0.652724788
CLTCL1	0.243231431	0.005920446	0.017273473
FGF22	-0.197189156	0.188783853	0.302400336
FSTL3	0.55595855	2.08E-07	1.84E-06
DGCR2	0.039288138	0.401579266	0.536368171
RNF126	-0.183937766	0.001358817	0.004808926
MNT	0.066952147	0.193881074	0.308718609
ZXDC	0.251468122	2.46E-08	2.65E-07
JMJD6	0.013539885	0.780464991	0.853625583
POLB	0.232088437	1.24E-05	7.43E-05
ST6GALNAC1	-0.576447627	3.39E-05	0.000182792
WIPI1	-0.352668675	8.26E-06	5.16E-05
FRMPD1	0.072486088	0.729423448	0.8167143
GBA2	-0.103777492	0.013075793	0.03380222
NDST1	0.29119697	1.56E-09	2.16E-08
ASNS	0.14084938	0.053732868	0.109465773
AP3M2	0.276262353	2.00E-07	1.78E-06
CNGB1	0.467449397	0.002001711	0.006731085
ST6GALNAC2	-0.280656665	0.010033307	0.027021006
CHAT	2.212175936	3.68E-13	1.01E-11
PABPC1	0.01776376	0.75266483	0.833749576
TESK2	0.273515505	1.53E-05	8.99E-05
CFAP20	0.042712316	0.297933499	0.42820783
CSNK2A2	0.071915601	0.045580926	0.095664232
PTPN21	0.278583132	4.58E-05	0.000239704
EIF2B3	0.053886126	0.237986311	0.360980942
CAMK2A	0.149799623	0.296190383	0.426315108
TCOF1	0.268347209	1.19E-07	1.11E-06
CDC42	0.046125765	0.279899188	0.408640265
OSBPL3	0.33346721	0.000140777	0.000650469
EPHA8	-0.253852519	0.284378883	0.413500292
SLC12A3	1.707550118	1.55E-19	1.32E-17
RAD18	0.241150997	6.40E-07	5.11E-06
ATP2B1	0.310237231	8.84E-07	6.87E-06
TRPM5	0.983034055	5.38E-08	5.39E-07
NCK2	0.099099939	0.037080187	0.080732542
MAP4K4	0.150859805	0.000897308	0.003351419
MGAT4A	0.561621749	2.90E-09	3.78E-08
RPL31	-0.038446221	0.507636583	0.636319317
WDR1	-0.102396927	0.035163787	0.077347185
SNX13	-0.013119809	0.817451512	0.87793431
MS4A12	-0.503392927	0.193226532	0.30803683
ARHGAP10	-0.18791223	0.010852437	0.02884251
RPS6KA2	-0.053768426	0.416286369	0.550585168
ING3	0.086391245	0.058170589	0.116946239
VASH1	0.207688022	0.00214523	0.007152377
LMCD1	0.102015371	0.199471212	0.31557767
BUD23	0.014027	0.776622666	0.850784675
SEL1L	0.020017304	0.694638132	0.790077809
TRIP13	0.346712248	1.95E-06	1.40E-05
ATP6AP1	0.012533737	0.811190223	0.874135682
TCF3	0.049971685	0.330351551	0.462570791
TRIB2	0.725115934	4.13E-14	1.37E-12
DAZAP1	-0.047710833	0.180568079	0.292022648
MBD3	-0.168708449	0.007741407	0.02170317
PRLH	-1.030460641	3.59E-05	0.000192793
HLTF	0.152285657	0.036359094	0.079474327
FAM50A	-0.299619393	1.56E-05	9.11E-05
FAM3A	-0.082829009	0.175563816	0.285441025
CPSF1	-0.069201659	0.279091051	0.407778704
MYO3B	0.139211598	0.279301181	0.408054079
CYBRD1	0.341235224	7.17E-05	0.000357922
CDH19	2.604078409	6.27E-12	1.39E-10
PDCD2	0.107026766	0.001627286	0.005623802
SLC6A15	3.456048932	1.56E-35	7.25E-33
RDH11	-0.207153198	7.94E-06	4.98E-05
PRKACA	0.159447625	0.000913561	0.003401012
ADGRL1	0.570462904	1.57E-09	2.17E-08
SPP2	0.688062172	0.022633666	0.053678148
ACTN1	0.005602176	0.920893011	0.949098621
ZFYVE26	0.095780791	0.041268819	0.08813046
RPS6KA6	1.046886068	2.73E-07	2.37E-06
EPN2	0.0830876	0.091957929	0.170055225
PTPN18	-0.531843455	1.90E-21	2.10E-19
LIMS2	-0.088078011	0.363936919	0.497888603
ASIC4	0.68645477	6.24E-06	4.01E-05
SPEG	1.001129364	2.91E-13	8.16E-12
LNX1	-0.427086672	5.00E-07	4.09E-06
ALDH3A2	-0.557786146	7.79E-15	2.92E-13
TFRC	0.159881177	0.080466777	0.152722736
SREBF1	-0.422214058	2.45E-09	3.25E-08
TRPC5	1.010750764	0.001239309	0.004438196
AFF4	0.071902204	0.235139546	0.357625565
UBE2D1	0.143112573	0.008822651	0.024236614
MPP5	0.04667521	0.349280152	0.48266645
RHOBTB1	-0.003633949	0.960349047	0.974747705
SMC1A	0.078252041	0.125504172	0.218073895
HSD17B10	0.042580383	0.479172826	0.609652553
MARK2	0.161888345	0.000150354	0.000690077
HMMR	0.390644313	6.16E-06	3.97E-05
CHFR	-0.13655675	0.009840828	0.02658306
TRHDE	1.749479035	4.44E-12	1.02E-10
P4HA2	-0.283530248	3.23E-06	2.22E-05
FCGR2B	-0.12664111	0.252146735	0.377338273
NFATC3	0.013027289	0.833470802	0.889662594
TRNT1	0.132528403	0.005396287	0.015941817
ACADVL	-0.290730235	1.04E-06	7.95E-06
STK10	-0.027673866	0.642914296	0.749595164
FBXW11	0.122955661	0.003474828	0.010890208
ACAP1	-0.463701355	5.04E-07	4.12E-06
CRMP1	0.532155876	1.17E-07	1.10E-06
EVC	0.43512208	1.32E-07	1.22E-06
DERL2	-0.101119954	0.01381036	0.035419147
SIDT1	-0.74317155	2.93E-08	3.12E-07
NDE1	0.061864968	0.235314833	0.357824148
IRAG1	-0.301992498	0.002885044	0.00928174
TMEM38A	0.492048677	4.06E-07	3.39E-06
AP1M1	0.07607292	0.111921459	0.199211035
PVR	0.012884622	0.842480973	0.895386406
XRCC1	0.089340988	0.039725586	0.085487359
SCARB1	-0.233650167	0.000724633	0.002777263
CYP2W1	3.087729508	1.04E-47	1.30E-44
MCM2	0.476597422	6.64E-10	9.85E-09
MOV10L1	0.046839052	0.735030548	0.821081003
PANX2	-0.470877783	0.00117692	0.004241343
SELENOO	-0.34412711	1.01E-07	9.57E-07
TP63	0.501537558	0.000663375	0.002570304
ALPK1	-0.364502187	1.16E-08	1.34E-07
LLGL2	-0.159031785	0.020165598	0.048705428
PDE8A	-0.443161554	1.75E-11	3.54E-10
CLCN4	0.590975574	5.61E-07	4.54E-06
NLE1	0.026240899	0.621391655	0.732400832
SDHA	-0.210047242	0.001118612	0.00405092
SMARCE1	-0.026864747	0.603308686	0.718343469
FNDC8	0.332636465	0.011851118	0.031110253
GSDMB	0.293277399	0.00920675	0.025119546
KDM5A	0.149118713	0.001334255	0.00473397
ADAM11	0.435897648	0.000708212	0.00272215
PPP2R3A	0.456044687	5.94E-11	1.08E-09
FERMT2	0.210519328	0.000606572	0.002371344
ABCB11	-0.778053728	0.001971163	0.006642319
DHRS9	-0.214586646	0.246838941	0.371158268
CD5L	0.382420852	0.081996119	0.155080965
PTGS2	-0.469922115	0.012726541	0.033033357
IGF2BP2	1.662989471	3.05E-24	4.83E-22
MAP3K13	0.236330881	0.003236835	0.010240591
ST6GAL1	0.035462604	0.683168342	0.780866324
TBX21	-0.272383033	0.036977482	0.080543993
VDAC1P1	-0.177537884	0.097698626	0.178591143
FRY	-0.130453787	0.114983847	0.203484994
PICALM	0.072809587	0.084447958	0.15889942
NSF	-0.263818281	2.45E-09	3.26E-08
GLI2	0.225059263	0.079161752	0.150653215
CLASP1	0.170373041	0.000115146	0.000545
MRPS34	-0.180480942	0.006487956	0.018665179
NOTCH3	0.520540779	2.72E-11	5.28E-10
CLNS1A	0.2192607	1.60E-07	1.45E-06
PPP2R2C	-0.601472573	0.000133245	0.000620459
TEAD2	0.411973384	4.72E-15	1.84E-13
EED	0.028545337	0.484422435	0.614634104
CDHR2	-0.820476714	1.02E-06	7.83E-06
SNCB	1.200420059	6.40E-10	9.54E-09
TSG101	0.105940986	0.003129932	0.009949583
NCBP3	-0.101645267	0.008750001	0.024063706
ATP2A3	-1.006295372	9.29E-15	3.43E-13
CA12	-1.037089825	3.15E-15	1.26E-13
MGLL	-0.518734399	6.89E-08	6.76E-07
NTN4	0.348440432	0.000705152	0.002711692
BCS1L	-0.018977175	0.68833592	0.785124614
NUAK1	0.757654516	4.53E-19	3.45E-17
DPP8	-0.089635392	0.043526622	0.092077229
SLC24A1	-0.064904504	0.248491671	0.373041999
ZNF532	0.295236125	1.36E-06	1.02E-05
SCARF1	-0.075461552	0.253597178	0.379097649
LMAN1	-0.068719515	0.240939837	0.364369592
HACD3	0.085170248	0.14491628	0.24503235
IPCEF1	-0.233809807	0.03075397	0.069230607
ZZEF1	-0.204144058	1.44E-05	8.50E-05
NOX3	0.159454929	0.728778382	0.816353397
ENO1	0.166977597	0.006320005	0.018242339
SLC12A1	-0.256933245	0.204366646	0.321365607
MYDGF	-0.498953025	2.51E-12	5.99E-11
ANO8	-0.051874834	0.462004505	0.593516819
TUBE1	-0.050299953	0.35909686	0.492706491
ARHGEF10L	-0.232546174	0.001521586	0.0053015
TXK	-0.641155777	1.29E-07	1.19E-06
WSCD2	0.952934431	2.63E-07	2.29E-06
KCNQ2	1.61443021	3.73E-09	4.76E-08
TACR2	-0.108184568	0.29733249	0.427635904
ACTR6	-0.099103243	0.094769167	0.174207195
TIPIN	-0.067198474	0.199419827	0.31551417
SRI	0.079994485	0.085023611	0.159757181
EIF4G3	0.049776615	0.288293868	0.417865789
NUP37	0.085222278	0.041164227	0.087963443
SEMA3A	0.332664285	0.029768576	0.067452622
GTSE1	0.211616631	0.004969694	0.014854874
SEMA3C	0.382874798	0.000884244	0.003307255
TTC38	-0.44947453	1.64E-14	5.84E-13
ACAT1	-0.202949716	0.001166383	0.004207539
GRAMD4	-0.179807483	0.004436841	0.01347454
CELSR1	0.036847207	0.642940877	0.749604311
WNT8B	0.542486862	5.31E-06	3.47E-05
ZNF638	0.101111433	0.025059779	0.058502551
SLC25A40	-0.163232738	0.004318226	0.013166878
TIMM21	0.146896147	0.000902221	0.003366313
ADD2	1.293468179	2.74E-17	1.59E-15
FGF4	-0.202303618	0.592434988	0.709237924
RASAL2	-0.010357391	0.874791581	0.917894715
VPS9D1	-0.248385634	3.22E-05	0.000174639
ZNF37A	0.053798703	0.241577776	0.365078646
MARK3	-0.000387288	0.989923238	0.993629149
SLC25A3	0.151722766	7.67E-05	0.000379051
FNDC3B	-0.007636538	0.903315823	0.937381994
FOSL2	0.27107579	0.0001078	0.00051406
CACNG5	1.754084904	4.92E-08	4.98E-07
CACNG4	1.422965981	8.11E-15	3.02E-13
FRYL	-0.268212486	8.33E-06	5.20E-05
TMEM131	-0.171330026	0.00064082	0.00249039
FSCN1	0.414613092	6.02E-05	0.000305995
ACTB	-0.143904063	0.01433285	0.03657373
MOCOS	-0.455113073	3.71E-07	3.13E-06
PLD1	0.114689477	0.146900707	0.247737187
ATP12A	1.319364049	7.71E-10	1.13E-08
WDR62	0.194542178	0.012152074	0.031754447
DLG1	0.140693702	0.009955747	0.026836661
RAB7A	0.070011361	0.044378725	0.093563177
BCAP29	-0.240428396	9.03E-07	7.01E-06
SEC31B	-0.430251105	1.19E-06	8.99E-06
SART3	0.138987014	1.47E-05	8.68E-05
ARHGAP15	-0.472453409	5.28E-06	3.46E-05
TUBA3D	-1.499649217	3.43E-13	9.53E-12
PAX2	1.159901147	9.81E-05	0.000472101
EXOSC7	-0.001497253	0.975516199	0.984639799
KIFAP3	-0.23252822	5.06E-05	0.000261209
MKRN2	0.050520735	0.155069103	0.258592854
MCM6	0.279481487	3.90E-06	2.64E-05
REXO2	-0.165672905	0.000287545	0.001226613
RBM7	-0.098118133	0.084508395	0.158990707
RBMS2	0.201811907	8.13E-05	0.000399147
BAZ2A	0.198999025	1.09E-05	6.63E-05
PTPN23	-0.05257111	0.27092863	0.398835826
MLH1	0.201911315	0.043612444	0.092220937
UNG	0.321657973	2.09E-10	3.43E-09
FMO4	-0.412522865	7.20E-08	7.04E-07
KLHL20	0.026132423	0.637932836	0.745546966
RGS11	-0.232718314	0.168992132	0.277041845
SLC46A1	-0.119384237	0.079780565	0.151614526
PLXNA2	-0.458113839	2.32E-08	2.52E-07
SPAG5	0.420151897	5.43E-10	8.23E-09
ANKRD13A	0.106973197	0.018280024	0.044858793
TPD52	0.07759901	0.262686744	0.389426187
ACACB	0.24577709	0.003069737	0.009788564
TRAF4	0.189803202	0.000220137	0.000968067
PAG1	-0.172616778	0.056180632	0.113607829
GPATCH1	0.33332839	2.56E-11	4.99E-10
ICAM3	-0.609692852	1.36E-06	1.01E-05
NT5C2	0.065302138	0.400698365	0.535485708
MCAM	0.248205685	0.000747028	0.002852984
GPC4	-0.230495412	0.035227907	0.077458415
MBNL3	0.420618109	7.36E-06	4.65E-05
CAMSAP3	-0.159535083	0.013799225	0.035397397
RAP1GAP	-0.675409103	1.52E-10	2.56E-09
XAB2	-0.180832786	0.005544002	0.016329968
ARHGEF1	-0.273240834	4.57E-08	4.67E-07
STXBP2	-0.372076055	1.33E-08	1.52E-07
MAP2K7	-0.014924261	0.74045625	0.825068627
NMRK2	0.587423663	0.009035971	0.024721017
DGKD	0.025465858	0.635509603	0.743649022
CTTNBP2	0.475145349	0.000474166	0.001904516
ACTL6B	1.163641536	3.51E-07	2.98E-06
RARB	0.111851972	0.261479502	0.388067861
TOP2B	0.291703555	7.76E-08	7.53E-07
TM9SF3	-0.079415404	0.106633926	0.191735956
NFKB2	0.004769942	0.94230167	0.963481556
UBE2T	0.12728679	0.063014257	0.125019211
PPP1R12B	-0.373100896	0.000215326	0.0009491
DNAJC10	-0.624966559	2.37E-11	4.65E-10
GTF3C1	0.118701106	0.003674573	0.011433816
IL4R	-0.168588219	0.040092751	0.086143111
USP33	0.068561507	0.13660738	0.233909299
PAK3	1.213104269	1.92E-13	5.57E-12
CAPN6	-1.365419187	1.42E-12	3.56E-11
DCX	-0.542704835	0.016724042	0.041671058
SNRPA	-0.035370781	0.506846972	0.635588168
SPAG6	1.85054819	7.18E-12	1.58E-10
EXOSC5	0.187634264	0.00293995	0.009434866
DYNC1I2	0.125045073	0.00373924	0.011603449
APBB1IP	-0.299589817	0.003696506	0.011489551
LRCH4	0.102487927	0.119286923	0.209561363
FAM76B	0.102291756	0.068153138	0.13336295
SIRT6	-0.343362899	2.47E-09	3.28E-08
TYR	-0.547040403	0.098991261	0.180507974
POLD3	0.035728589	0.420816193	0.554830524
ACTN2	0.621828302	0.000304693	0.001291207
CAPZB	-0.077560576	0.03445287	0.076067816
GPR137B	0.10908917	0.177017962	0.287379912
NAALAD2	0.891486375	3.04E-13	8.50E-12
JADE1	0.159170778	0.001641163	0.005663875
SLC25A43	0.079896242	0.273439293	0.401528029
UBE2A	-0.018542004	0.620077471	0.731423593
FGFR1	-0.083778222	0.347826886	0.481013649
FKBP6	-0.603934096	0.000199021	0.00088523
SMC1B	0.548800872	0.001202084	0.004322682
FBLN1	-0.822455064	1.59E-08	1.79E-07
ITGA8	-0.388038381	0.000232326	0.001016307
CST7	-0.476592846	0.00043239	0.001755579
MAP2	0.965459426	3.60E-12	8.39E-11
PIAS2	0.041935495	0.427974743	0.561533515
AMPH	-0.307986757	0.030557555	0.068881471
ARAF	0.101831964	0.092820505	0.171301978
MCCC1	0.210390296	0.00012007	0.000565229
LAMP3	0.806096766	3.82E-11	7.19E-10
FAP	0.327258434	0.006168011	0.017869366
NEBL	0.532136332	0.000293461	0.001248787
ACER3	-0.052401461	0.336213534	0.468810068
UBE2K	-0.041733799	0.227122654	0.348265762
PIK3C3	0.143292585	0.001663701	0.005733249
N4BP2	0.137035116	0.066930075	0.131400234
TIGAR	0.082796073	0.145339494	0.245654506
TULP3	-0.088998433	0.045717715	0.095880906
SYNJ2	-0.113532354	0.056382284	0.113911973
ADCY2	0.32066302	0.035652667	0.078228997
PPP2R5C	-0.048316778	0.165436583	0.272328831
PMS2P1	0.233243606	1.55E-05	9.05E-05
RBFOX1	0.622830765	0.005061374	0.015075977
GNB1	0.036127444	0.344606745	0.477666687
HOXA9	0.563052826	0.001060106	0.003868457
EDN1	0.185805055	0.056341175	0.113846165
MLLT10	0.050620919	0.351187043	0.484488203
ZCWPW1	0.05984639	0.412924657	0.547351245
ADCYAP1R1	-0.442147834	0.018126751	0.044539286
FGF20	-0.573863655	0.062064919	0.123484775
P2RY10	-0.410217166	0.002946318	0.009452267
ITM2A	-0.23974895	0.060611533	0.121080828
NRDC	0.029363262	0.339596258	0.47219388
VDAC3	0.002963644	0.948474829	0.967432235
PCM1	-0.179845044	0.000962064	0.003556757
TNRC6C	0.240494805	0.000756869	0.002884233
CBFA2T2	0.197969343	5.80E-05	0.000296093
BRINP1	1.96477384	3.90E-21	4.12E-19
ITCH	0.142416297	0.005981137	0.017422593
PKD2L2	0.346950148	0.007131208	0.020262233
TP53INP2	-0.163746808	0.006058543	0.017605771
SDF4	-0.111429555	0.0173333	0.042916518
MYH7B	-2.09385234	7.27E-32	2.40E-29
BPIFB2	-3.892690948	1.02E-39	7.28E-37
TP73	-1.015271751	2.78E-15	1.12E-13
TOLLIP	-0.130548592	0.014865386	0.037728318
UBE2D4	-0.094318866	0.028339082	0.064734132
CLUL1	-0.080449878	0.527035772	0.653389137
RUNX1T1	-0.004113418	0.973949721	0.983579169
CDH17	0.460325909	0.008722506	0.023999638
THOC1	0.121242688	0.038377706	0.083073833
FKBP7	0.191758726	0.006254634	0.018084964
OSBPL6	-0.427833303	0.009131094	0.024943734
SLC1A3	0.888037305	7.41E-11	1.32E-09
XRCC5	0.219956633	4.13E-10	6.40E-09
LXN	-0.492714063	1.04E-07	9.84E-07
SP140	-0.348922303	0.005260297	0.015590726
MKNK1	-0.053007321	0.175056616	0.284813149
TNS1	0.034965969	0.663841839	0.766816962
REXO1	-0.165451074	0.003909252	0.012056214
SAR1A	0.051995419	0.164476576	0.27110548
CDC14A	-0.335062764	4.59E-06	3.05E-05
RAPGEF3	0.428090632	0.000165269	0.000751308
CEACAM1	-1.025445536	1.99E-18	1.39E-16
SENP1	0.275574684	5.88E-10	8.84E-09
DUSP13	0.095299865	0.613648338	0.726675438
CIC	0.314960749	4.43E-09	5.54E-08
LIPE	0.090039428	0.273856993	0.401875896
FDFT1	-0.209622014	0.000452657	0.001828035
PAFAH1B3	0.144260891	0.05079138	0.104435826
OPHN1	0.053712745	0.476730193	0.607467791
AFM	0.858933793	0.016412511	0.040996646
KIF22	0.388685424	4.34E-11	8.10E-10
SCGN	-0.598143881	0.097928679	0.178929923
CARMIL1	0.176370004	0.009309771	0.025353932
PGM1	-0.045513051	0.508298134	0.636829086
DDX1	0.233499013	2.51E-08	2.70E-07
DNM2	0.088638274	0.074866011	0.143908631
EPB41L2	-0.086099882	0.3560942	0.489654002
RIMS1	0.07005546	0.746622874	0.829399006
MOXD1	-0.193389374	0.205206437	0.322382077
STX7	0.016403997	0.73427154	0.820485129
RABL2B	-0.271645606	1.56E-05	9.10E-05
KEAP1	0.233789537	9.43E-05	0.000456275
DDX43	0.869357433	0.000648542	0.002516977
PTPRH	-0.367450262	0.015510959	0.0390866
DCT	-0.033771429	0.844968894	0.897291657
SLC35C2	0.044519383	0.33566667	0.468194388
CRYBG3	0.193130993	0.126340021	0.21929639
EPHA6	0.809831519	1.32E-05	7.85E-05
SCTR	0.077093933	0.698689787	0.793085361
RFX3	-0.265711641	0.00132792	0.004715847
RIF1	0.36039586	1.96E-08	2.17E-07
RAB21	0.062384588	0.143226027	0.24280031
SLC4A4	-0.349451307	0.039287567	0.084714002
SMARCA2	-0.140019247	0.063234022	0.125386826
RDH8	-0.130243172	0.678462592	0.777426104
SESN1	-0.485220745	5.71E-18	3.73E-16
MID2	0.031794574	0.688434029	0.785164112
DNAAF6	-1.336929927	2.88E-08	3.07E-07
COL5A3	0.328912451	0.000413973	0.00168955
SRCAP	0.14913511	0.0019318	0.006527267
PUM3	0.179326183	0.000115959	0.000548458
CPB2	0.029886552	0.830512311	0.887404312
CHRNA3	0.037344149	0.834618001	0.890530751
KCNN2	-0.546562908	3.00E-07	2.58E-06
CNOT4	-0.001269394	0.96819867	0.979974598
PSEN1	0.015024064	0.619351241	0.730833943
CPOX	0.032069403	0.482971518	0.613337803
CLDND1	0.094229767	0.04133466	0.088219269
MOK	-0.280554989	0.000320656	0.001350294
HSP90AA1	0.05794147	0.316079888	0.447821816
RBL1	0.157660302	0.009624484	0.026065523
DLGAP4	0.122082561	0.002225236	0.007377929
IGSF9B	0.501276134	0.001989768	0.006694865
CFHR2	-0.570898566	0.65345715
CROCCP3	-0.130505522	0.071404259	0.138478574
NDC80	0.614014983	1.17E-13	3.52E-12
AP4E1	-0.114606365	0.015884393	0.039894457
RSBN1	0.096355016	0.044675687	0.094065337
MAGI3	0.074207773	0.192200229	0.306669549
CXCL2	-0.699771413	2.44E-05	0.000135437
AFP	1.080650517	5.90E-06	3.82E-05
COL4A4	1.422138069	6.47E-18	4.20E-16
TCF7	-0.380394447	0.000246875	0.001071051
OSTM1	-0.18892412	0.000739683	0.00282904
CDH7	1.052792434	7.76E-05	0.000383023
IMPG2	1.494319878	1.01E-26	2.06E-24
PCNP	0.227465024	1.51E-05	8.85E-05
EXD2	-0.004003906	0.915700391	0.945837014
ARG2	-0.202763293	0.038982982	0.084183631
MEF2C	-0.190396999	0.014869202	0.03773561
PTPRC	-0.155361549	0.203161127	0.319884829
CACNA1S	-2.395167457	4.44E-17	2.48E-15
PKP1	0.242626661	0.24121533	0.36468525
UBA5	-0.044813063	0.307414683	0.438682957
STK17B	-0.059571692	0.403961129	0.538703065
CDC14B	0.140832985	0.03296061	0.073303004
ZNF510	-0.098132652	0.037805974	0.082031522
LRP2	1.108819834	9.13E-07	7.08E-06
ZNF506	-0.051111652	0.66074623	0.76426123
JMJD4	-0.048531752	0.369950268	0.504130145
DUSP12	0.141311308	0.001657555	0.005714037
AACS	-0.387405478	1.21E-10	2.08E-09
DELE1	-0.137037266	0.000285057	0.001217816
SLC13A1	1.062545498	0.009065758	0.024791536
CADPS2	-0.461420034	1.55E-06	1.14E-05
PCDHB4	0.409658441	0.000148393	0.000681792
PCDHA6	0.631378941	0.001377578	0.004867573
PCDHGA2	0.4119979	0.000276131	0.001183348
HSPB11	0.05273352	0.336691566	0.469345767
PHLPP1	-0.424068918	5.80E-11	1.06E-09
ATP8B1	-0.354671976	2.27E-06	1.61E-05
IL12RB2	0.662104698	6.57E-07	5.24E-06
SMARCD3	0.319473186	0.001456334	0.005103484
WDR70	0.231809402	7.02E-08	6.89E-07
FYB1	-0.129308664	0.274455567	0.402414805
MPP4	0.448660253	0.000422285	0.001718739
STRADB	-0.071092016	0.244597985	0.368453343
BZW1	0.360357519	1.08E-10	1.88E-09
PGR	-0.916185479	4.64E-08	4.73E-07
C1QTNF3	0.383326433	0.000234938	0.001026384
ME2	-0.150013019	0.003394585	0.01067384
C5orf22	0.186069203	0.00023177	0.001013983
CCNT2	0.028962652	0.580485836	0.699260036
FAM135A	0.219619791	0.010017786	0.026988189
COL19A1	0.934905161	2.12E-06	1.51E-05
EPB41L3	-0.08113303	0.379496065	0.514427952
COBLL1	0.022465	0.834724469	0.890596686
DLG3	-0.080754692	0.123267377	0.215062118
KCNK2	1.180561738	2.76E-08	2.95E-07
SERTAD4	-0.400601994	0.001932235	0.006528188
TRAF5	-0.843412073	6.11E-24	9.37E-22
MRPL22	-0.074773025	0.134427658	0.230918217
GEMIN5	0.262601763	1.38E-09	1.94E-08
OPRK1	0.514331966	0.010312096	0.027645179
NFE2L1	0.003317041	0.941700833	0.963076318
SEMA5B	0.122566799	0.438939458	0.571906366
GSK3B	0.131280142	0.00135804	0.004806603
ITGB5	0.044550669	0.506086979	0.634933645
ERC1	0.166343184	0.001617044	0.00559173
XPO1	0.261509487	6.62E-08	6.51E-07
LINC01587	-0.243343797	0.204439703	0.321422064
RNF13	-0.019246406	0.684870243	0.782281484
TRPM3	-0.050827808	0.75324397	0.834079704
PALB2	0.220016316	1.36E-07	1.25E-06
DOP1A	0.02257433	0.720406319	0.809968706
LYRM2	-0.007087365	0.831329134	0.88792139
BCKDHB	-0.026918561	0.661782265	0.765054158
KAT6A	0.235376534	0.000131011	0.000611123
TUT7	-0.234536902	6.45E-05	0.000325789
ULK2	-0.120835012	0.024825226	0.058057121
GRHL2	-0.215729773	0.002697399	0.008736358
TNPO1	0.02070181	0.659342662	0.763083466
PLOD1	-0.022443256	0.722531582	0.811537185
P2RX5	0.165153038	0.255675663	0.381506269
ITGAE	-0.209065387	7.92E-05	0.000389933
DIS3	0.11815971	0.007203526	0.020444481
PIBF1	-0.025819832	0.645885807	0.751952509
TDRD3	-0.165926897	0.000870772	0.003264802
AC000061.1	-0.775640049	0.008516168	0.023522496
NUFIP1	0.250175665	1.93E-08	2.14E-07
PDS5B	0.151751483	0.006755411	0.01932208
OXCT1	-0.018352145	0.844340598	0.89682686
RRAGB	0.382528482	1.02E-11	2.17E-10
EPYC	0.376344186	0.098200129	0.179368562
CYLD	-0.19455723	0.000290959	0.001239589
SLC27A5	-0.134207487	0.136654542	0.233980039
ZNF324	0.051911001	0.250136481	0.374918911
ZNF671	-0.348875456	0.000872042	0.003268033
ZNF416	0.171007006	0.000240245	0.001046829
ZNF586	-0.215599556	0.001809111	0.006163733
ZNF446	-0.187883296	0.000183267	0.000823579
ZNF264	-0.138797068	0.012883607	0.033380406
RPS5	-0.043392358	0.510123118	0.638415835
FAT1	-0.132466607	0.219144661	0.338916071
YTHDC1	0.068217271	0.008258893	0.022939928
CHMP2B	0.097312285	0.065912502	0.129797376
SMAP2	-0.347920721	1.82E-09	2.49E-08
PPIE	0.104511971	0.019401546	0.047138912
ZMPSTE24	0.186317331	0.000239615	0.001044651
STARD7	0.305119058	1.73E-16	8.56E-15
NOA1	-0.092777998	0.030436122	0.068650288
REST	0.271963893	4.83E-07	3.97E-06
HAL	0.167354265	0.284440137	0.413553509
SSH1	0.10378843	0.010182168	0.027361029
GSTP1	0.229555103	0.0013527	0.004789819
APLP2	-0.069099948	0.175453478	0.285296412
FAM234B	-0.153653591	0.056210307	0.113639119
SLCO1A2	2.024640787	9.74E-18	6.16E-16
WBP11	0.304258446	8.55E-14	2.64E-12
EIF3I	-0.026244365	0.543482299	0.667367973
NKAIN1	1.520714357	1.25E-22	1.63E-20
COL16A1	0.154972568	0.107576432	0.193117546
TXLNA	0.044395183	0.168044317	0.275736582
APOB	0.542324194	0.017275576	0.042797431
NCOA1	-0.003834731	0.931311337	0.956460592
AGBL5	0.265315853	6.69E-09	8.10E-08
EFR3B	0.512143037	6.51E-07	5.20E-06
KIF3C	0.938559509	3.94E-30	1.12E-27
RAB10	0.094556278	0.011854722	0.03111672
GCKR	0.370921485	0.016846211	0.041923248
HADHA	-0.087223524	0.023668609	0.055755851
MAPRE3	-0.805097017	5.75E-16	2.60E-14
CAD	0.401980892	1.91E-09	2.60E-08
CD59	-0.260688785	1.52E-05	8.89E-05
CD82	-0.228248497	0.012857485	0.033321358
BCORL1	0.521862984	9.15E-15	3.38E-13
ATRX	0.037825403	0.546758669	0.670157085
AK6	-0.016563632	0.732214832	0.818873046
FCN1	0.134836833	0.325472751	0.457372038
MYNN	0.264369514	1.35E-07	1.24E-06
MECOM	0.167690346	0.023455023	0.055343951
SCAMP1	-0.129603893	0.015022566	0.038066871
PREP	0.077595773	0.088283603	0.164584067
HACE1	0.06228399	0.354774598	0.488258983
SEH1L	0.216092779	3.30E-07	2.81E-06
WDR47	0.038794758	0.519756029	0.646769065
WDFY1	0.113832306	0.017302233	0.04285551
OVGP1	-2.343571429	3.94E-25	7.07E-23
SLC25A24	0.229243012	0.002420649	0.007943548
MAP3K4	-0.092765225	0.027704252	0.063512458
PILRA	0.381889403	6.26E-05	0.000316839
IGSF9	0.661827364	3.22E-11	6.13E-10
ABCB1	-0.598333048	3.73E-07	3.15E-06
ZNF213	-0.302716842	8.76E-05	0.000427339
AKR1B1	0.629322288	8.22E-10	1.20E-08
CPNE3	0.050711355	0.35329305	0.486769259
RRN3	0.078883833	0.070996952	0.1378691
CTTN	-0.108664815	0.014985068	0.037991103
WNT11	0.877810978	5.38E-07	4.38E-06
MTIF2	0.124974096	0.003032738	0.009692213
DDHD2	-0.081285123	0.179760577	0.290951937
TTC39A	-0.37935869	0.000116202	0.000549411
EPS15	0.041053919	0.331092155	0.463348352
ORC1	0.304610591	8.11E-05	0.000398164
MGST2	-0.418975302	4.26E-10	6.58E-09
CHERP	0.346088311	1.06E-11	2.25E-10
ATG16L1	-0.039641722	0.300369481	0.430857686
USP40	-0.122946168	0.007909078	0.022095824
POMGNT1	0.01030431	0.817171744	0.877833149
RAD54L	0.506203441	3.07E-11	5.90E-10
MAST2	-0.070276988	0.18733992	0.300713454
DNAJA1	0.300452553	5.58E-09	6.87E-08
B4GALT1	-0.790174617	8.68E-16	3.79E-14
CHMP5	0.112848368	0.011823961	0.03105071
NFX1	-0.096737249	0.003543164	0.011077474
AQP6	-0.180186924	0.24051003	0.363898415
DIMT1	-0.230563276	2.52E-07	2.20E-06
IPO11	-0.000213425	0.996687621	0.998059645
FOLH1	-0.546694283	9.97E-07	7.67E-06
EIF2AK1	-0.034258889	0.312374457	0.443825555
NME8	-0.061049264	0.700133596	0.794205984
EPDR1	-0.298818272	0.010284224	0.027585247
SNX10	0.227633911	0.030432806	0.068646679
SEPHS1	0.06888441	0.074449994	0.143212165
MRPL28	-0.02160352	0.755882152	0.836017279
HBQ1	1.3286603	4.96E-11	9.16E-10
ITPKC	0.208105042	0.000150168	0.000689317
CEACAM6	-0.627631264	0.002762465	0.008929025
FAT2	0.636282984	0.000178472	0.000804926
RBM22	0.172529899	3.66E-07	3.09E-06
TMED2	-0.121473966	0.014289935	0.036471423
ERO1B	-0.412470138	0.000955422	0.003535142
ZFAND6	0.010846193	0.814401447	0.876038464
HSD17B2	-0.473845165	0.002961176	0.009494605
TXLNG	-0.008507797	0.864506886	0.910763251
PPEF1	-0.14879644	0.299375264	0.429724282
LAT2	-0.160294695	0.042893032	0.090953325
HUWE1	0.176381024	0.001026586	0.003761923
ZW10	0.154019965	0.001143591	0.004132401
ALG9	-0.035890859	0.413906955	0.548199264
MYBPC2	0.360450966	0.027048594	0.062226854
NOX4	0.398160616	0.000151075	0.000692907
ACOX3	-0.327658236	2.12E-07	1.88E-06
MTMR2	0.034532396	0.403858473	0.538635031
PPP1R15A	0.140071828	0.046343692	0.09692952
HSD17B14	0.095601876	0.423190067	0.557045941
TRIP6	0.277128471	8.69E-05	0.000424149
ACHE	0.611486792	2.50E-06	1.76E-05
FTL	-0.021198201	0.797488014	0.864721637
SRRT	0.068335744	0.076542812	0.146624598
BAX	-0.065833562	0.256979899	0.382966767
NLK	0.009550255	0.840257735	0.89402064
PIGS	0.070751122	0.285089306	0.414196312
ADAMTS2	-0.169949594	0.104376049	0.188421303
TMPRSS11E	-0.227443409	0.328920774	0.461019137
ATXN7L3	0.206010317	1.32E-06	9.88E-06
PGS1	0.292266085	1.71E-10	2.85E-09
PSMC5	0.069001254	0.17173732	0.280654989
UIMC1	0.051963053	0.137066942	0.234545626
CETP	-0.144425911	0.139017948	0.23721453
MMP2	-0.26293277	0.031628977	0.070813864
MT3	-0.152244699	0.410376159	0.545074688
LPCAT2	-0.754002792	2.04E-16	9.98E-15
GNAO1	0.060529152	0.643082672	0.749720839
OGFOD1	-0.100719349	0.010803148	0.02873633
SH3BP2	0.209021011	0.000235797	0.001029686
NOP14	0.137283714	0.001479706	0.005177675
ADD1	0.003659183	0.915897864	0.945997461
L2HGDH	0.155280195	0.006842456	0.019537527
TXNDC16	0.016177607	0.825281544	0.883797893
RTRAF	-0.101261336	0.016856994	0.04193704
NID2	0.246515694	0.054806454	0.111273288
GMCL1	0.050278059	0.263028857	0.38984669
SF3B2	0.151264785	5.22E-06	3.42E-05
KLHL42	-0.021668377	0.665653001	0.768049341
GNAS	-0.212831562	0.000502159	0.002004278
DNM1L	0.140441889	0.000193954	0.000865095
PTHLH	0.15810654	0.202601549	0.31917961
PHACTR3	0.936691668	6.95E-07	5.51E-06
ERGIC2	-0.006221056	0.900801266	0.935476179
TFAP2C	-0.115916502	0.232696139	0.354678205
AURKA	0.458649262	6.15E-09	7.50E-08
CASS4	0.187337441	0.077503228	0.148215987
PIR	-0.560331334	1.60E-07	1.45E-06
AAMDC	0.025838898	0.740917888	0.825376132
RFX2	-0.666677641	1.41E-09	1.97E-08
METTL2A	0.163861579	2.21E-05	0.000124569
SULT2B1	-0.450009949	0.003131968	0.009954474
ALG6	-0.034382235	0.474819834	0.605715867
CNOT3	0.072972491	0.12927068	0.223470041
GP6	-0.069840045	0.630014626	0.739318988
PTPN4	-0.125281461	0.028913951	0.065810573
DDX18	0.252030482	4.88E-08	4.96E-07
KHSRP	0.028457985	0.435931359	0.56917331
GNA11	-0.188642831	8.05E-05	0.000395743
ASAP3	0.431487985	1.30E-07	1.20E-06
EDEM2	-0.097063659	0.039064026	0.08431764
DNMT3B	0.230941681	0.007646995	0.021492704
REM1	0.100046788	0.389396504	0.524310585
TPX2	0.650201611	2.92E-16	1.40E-14
FER1L4	-0.163342836	0.138568792	0.236589373
PDRG1	0.335971124	1.78E-09	2.45E-08
EPB41L1	0.277328504	0.000136678	0.000634305
SLC15A1	-0.361790025	0.008309911	0.023048265
DOCK9	-0.047026864	0.4536445	0.585895332
ANKRD10	0.00039637	0.994677973	0.996645905
TGDS	0.197010772	0.000142363	0.000656729
DOCK3	1.310267969	7.45E-23	9.97E-21
C3orf18	-0.019356927	0.80817101	0.871915487
COQ9	-0.176809827	0.00016949	0.000768486
TMEM40	-0.097721574	0.547743588	0.670932652
KIF9	-0.286545028	0.000191016	0.000853227
ARHGAP28	0.755282562	1.13E-10	1.95E-09
CRLS1	-0.020732412	0.606542143	0.720692107
DEFB127	-0.244498455	0.806355636
PPP1R13B	-0.119256976	0.024758445	0.057947854
ATRN	0.173928919	0.000703934	0.002708046
SMOX	0.032059871	0.665635124	0.768049341
SIGLEC1	0.54587259	8.54E-06	5.32E-05
FKBP1A	0.181606184	3.77E-05	0.000201193
NSFL1C	0.052630211	0.182469552	0.294466938
SLC4A11	-0.020161389	0.872566881	0.916383042
C20orf194	0.004846623	0.94405872	0.964777482
ZNF343	0.246251205	1.07E-08	1.25E-07
EBF4	0.364078903	0.001785036	0.006090007
CPXM1	0.510981322	4.36E-05	0.000229329
MAVS	0.071599061	0.134165455	0.230507394
LZTS3	-0.011906833	0.872861317	0.916499802
F11	-0.530457434	0.02391345	0.056233291
XRN2	0.265310179	3.71E-08	3.87E-07
KIZ	-0.697099084	4.88E-10	7.48E-09
DYNLL1	-0.074541004	0.071083676	0.137990625
TESC	-0.771811157	1.18E-05	7.10E-05
SNX5	0.122283894	0.004516991	0.013677462
RPL6	-0.010560869	0.85939486	0.907384714
SIRPG	-0.671443655	6.65E-06	4.25E-05
MAPKAPK5	0.179759914	1.49E-08	1.69E-07
P2RX7	-0.208666574	0.0267477	0.061711054
ESF1	0.233184483	0.000565093	0.002226372
RBBP9	-0.017769534	0.728959919	0.816488169
ANAPC5	-0.11190214	0.000372096	0.001537616
SLC23A2	0.035291181	0.604454435	0.719226678
SLC8B1	-0.018521572	0.760915913	0.839704448
TMEM230	0.002394427	0.9549777	0.971538709
DZANK1	-0.177332097	0.009283292	0.025302489
KDM2B	0.09824025	0.018080766	0.044445402
CFAP61	-0.990257862	4.24E-10	6.55E-09
LHX5	0.15917261	0.433306352	0.566673669
TASP1	0.109430005	0.023350789	0.055133489
OAS1	0.706559699	1.21E-08	1.40E-07
GCN1	0.115767608	0.012373212	0.032235453
RPLP0	-0.116094213	0.059150242	0.118641501
PXN	0.192534946	2.17E-05	0.000122396
SIRT4	0.065778023	0.306482941	0.437759308
RPH3A	0.624629839	0.000121568	0.000571472
KIF16B	-0.251627537	9.38E-06	5.78E-05
TRMT6	0.317953986	1.66E-11	3.36E-10
CHGB	0.55735636	0.001486996	0.0052
PEBP1	-0.178988939	6.95E-05	0.000347715
TBX5	0.960632013	0.006412177	0.018476398
BRAP	0.087314408	0.00167387	0.005764603
ERP29	-0.074407779	0.206758459	0.324227619
NOS1	0.282819009	0.167038544	0.274367767
FUS	0.230215813	3.00E-07	2.58E-06
IGBP1	-0.085893295	0.041634112	0.088758949
FXYD5	-0.02739487	0.78711257	0.857964495
ZNF302	0.501136461	1.17E-09	1.67E-08
GRAMD1A	0.033845999	0.521818221	0.648692466
FXYD3	-0.702470395	2.67E-07	2.32E-06
HEPH	0.541477241	8.59E-07	6.69E-06
CDIP1	0.203092649	0.008997942	0.024634381
CMTM1	0.099797568	0.204712131	0.321744486
KCNH4	0.14749953	0.294557484	0.424514621
GANAB	0.220558179	1.42E-07	1.31E-06
GMIP	-0.196448252	6.92E-05	0.000346436
RBM41	0.044366372	0.471285723	0.602263655
BIRC5	0.575184384	5.15E-11	9.48E-10
LAG3	0.096268929	0.477058497	0.607795968
MLF2	0.122563516	0.006199753	0.01794963
OTUB2	-0.473973534	1.15E-07	1.08E-06
DDX24	-0.02050563	0.552637101	0.675146016
ZBTB25	-0.128512492	0.003283709	0.010370032
NECAP1	-0.115595511	0.007354457	0.020800543
ARHGAP4	0.626257945	3.96E-10	6.15E-09
ANKRD24	-0.539512269	2.46E-07	2.15E-06
DHX32	-0.107926154	0.011682435	0.030728128
RCOR1	0.16767064	0.000297923	0.001265755
GPATCH2L	0.237588636	1.60E-05	9.34E-05
LTBP4	-0.057861108	0.622305151	0.733172374
BLVRB	-0.214819538	0.015916044	0.039953885
SLC9A1	-0.176014243	0.002176321	0.007240349
SPTLC1	0.104254977	0.061051448	0.121819729
PAPOLA	0.120199945	0.014017861	0.03586396
CCNK	0.224369314	0.003349208	0.010546077
PCBP4	0.194898577	0.008949353	0.024531012
RGS1	-0.138155241	0.239742108	0.363038568
YPEL3	0.176484842	0.03452662	0.076205413
MRPS33	-0.059984486	0.282118767	0.411104667
NDUFB2	-0.038435612	0.526946546	0.653359501
NUDC	-0.032257526	0.584333664	0.702659513
MAEA	0.034916893	0.453936768	0.586121193
ICAM1	0.344463535	0.000944281	0.003501041
STRN4	-0.050524902	0.262190887	0.388878413
IRAK3	-0.132485176	0.274953294	0.403026428
LYZ	-0.121072486	0.416255375	0.550562375
SI	-0.295474831	0.479024553	0.609524961
MUL1	0.089210751	0.021125071	0.05063158
TFAP4	0.294337422	1.75E-09	2.40E-08
PDCD7	0.11249966	0.00058559	0.002299203
SPG21	0.064705804	0.02646662	0.061179976
FETUB	-1.151705606	2.91E-07	2.51E-06
DNAJB11	0.226632466	1.09E-05	6.63E-05
P3H2	0.67004636	1.46E-08	1.66E-07
THPO	1.429934621	3.38E-16	1.61E-14
CHRD	0.226960691	0.084788503	0.159427729
FLT3LG	0.114031943	0.220931346	0.341074771
RAB11FIP3	-0.242311444	2.26E-05	0.000126826
GNPTG	-0.258083364	1.62E-06	1.19E-05
ZNF268	-0.008017534	0.867412728	0.912823379
GOLGA3	-0.165987843	3.73E-05	0.000199116
PABPC4	0.202288375	3.06E-07	2.63E-06
CD209	-0.123192224	0.286189053	0.415537572
CERS4	0.083378403	0.402904413	0.537681222
MCOLN1	0.006844556	0.908358223	0.941028072
USP48	0.017866304	0.645244825	0.751502102
EFNB1	0.752319972	1.06E-19	9.23E-18
PDPR	0.020735506	0.726518271	0.814331657
AARS1	0.026368673	0.585271957	0.703400032
GLG1	0.016979129	0.682908977	0.780776854
KIF4A	0.384830496	9.04E-08	8.67E-07
TNRC6A	-0.008365642	0.868530052	0.913510315
PLEKHG2	0.552342558	8.08E-13	2.11E-11
DLL3	1.539220111	3.57E-16	1.68E-14
NAT14	0.215736934	0.007461218	0.021059322
PITPNM2	-0.237873183	0.005427362	0.016022973
EXOC1	-0.106816577	0.008827971	0.024246468
RBM27	0.146342916	0.001666954	0.005742974
POU4F3	0.291681839	0.053468836	0.109028588
OSBPL8	0.142529338	0.037855037	0.082106439
DTX2	-0.270921158	5.80E-05	0.000296139
NLRC4	0.272568403	0.000264573	0.001139062
PUS7	0.121883284	0.022788238	0.054006315
LAMB4	-0.197000479	0.098143133	0.179272638
NRCAM	0.377638879	0.004805306	0.014426015
LAMB1	-0.005890752	0.946053088	0.965981462
SLC26A4	-0.7759924	1.31E-07	1.21E-06
SLC26A3	-0.453702924	0.039260005	0.084667611
DLD	0.015561273	0.75907361	0.838480841
WDR7	-0.130509252	0.005250872	0.015565098
TXNL1	-0.091391401	0.031555553	0.070665292
IL5RA	-1.287148562	1.23E-09	1.75E-08
ABCC6	0.20399327	0.071356255	0.138392186
CMTM6	-0.077915457	0.231283421	0.353008751
ITGA6	-0.407341009	2.89E-09	3.76E-08
RAPGEF4	-0.08343423	0.304473987	0.435542913
MAP3K20	-0.157946342	0.017514156	0.043299997
SMPX	-0.838951063	0.002899094	0.009319449
FH	-0.231133174	1.44E-06	1.07E-05
SEL1L3	-0.301652445	1.51E-05	8.84E-05
TF	0.686963647	4.64E-06	3.08E-05
CDV3	0.353998358	5.80E-12	1.30E-10
MYO15A	0.361477511	0.000801359	0.003033835
ALKBH5	-0.055957653	0.146959929	0.247817576
APOH	-0.326565072	0.225563805	0.346453389
NLRP1	0.538371084	2.49E-08	2.68E-07
PITPNM3	-0.119084284	0.16543611	0.272328831
SPAG7	0.017600754	0.730110328	0.817227621
ORC6	0.277864792	2.40E-05	0.000133449
ZFHX4	1.574281207	1.02E-16	5.29E-15
SLC17A6	1.896012482	0.000136932	0.000635161
CPA1	1.677503917	7.17E-14	2.25E-12
ZC3HC1	0.140310626	0.000361113	0.001498731
ESR1	-0.84091614	2.48E-12	5.94E-11
RGS17	-0.052310406	0.671640808	0.772685312
ANGPT2	0.10658026	0.240139851	0.363461328
TMEM101	-0.892964827	4.17E-09	5.26E-08
CD200	0.006194802	0.95237742	0.96965768
CCDC80	0.308256867	0.004432748	0.013466121
CMA1	0.280397304	0.234610653	0.357024747
PSME1	-0.025136919	0.674546739	0.774536232
PPP2R3C	-0.035660815	0.475845952	0.606696006
HAUS4	-0.133312241	0.012524244	0.032588611
JPH4	0.107426584	0.469507302	0.600624065
MYH7	1.119700679	1.37E-09	1.93E-08
CEBPE	0.194307683	0.194481489	0.309482535
SLC7A8	0.351257946	0.007553735	0.021276117
OSGEP	-0.167644895	0.000132984	0.000619461
SLC22A17	0.713615736	4.76E-10	7.31E-09
RNF31	0.235127283	7.76E-05	0.000383078
SCFD1	-0.103430793	0.01033441	0.027695721
G2E3	0.254691321	9.40E-05	0.000454983
HECTD1	-0.002369016	0.965075917	0.977809015
HNRNPC	0.178702227	3.50E-06	2.39E-05
RPGRIP1	-0.025758638	0.760760655	0.839572285
SUPT16H	0.238695247	5.97E-09	7.30E-08
TOX4	0.101402983	0.001937344	0.006543791
GEMIN2	0.253194298	1.71E-07	1.54E-06
TGM1	1.507885825	3.24E-29	8.32E-27
TINF2	0.031062671	0.41339789	0.547797045
DAZL	0.374589371	0.134687365	0.231294824
TBL1Y	-0.202323556	0.839605589
SEMA6A	0.48758925	2.19E-05	0.000123116
TRPM7	-0.116620687	0.044298858	0.093409561
TYRO3	0.250248797	0.000801811	0.003035258
WDR76	0.038766004	0.604307159	0.719130934
CAPN3	-0.368912591	0.000141385	0.000652881
SNAP23	-0.121240792	0.003461247	0.010854445
TBX15	0.613505424	1.53E-05	8.95E-05
PHGDH	0.478066696	8.88E-08	8.53E-07
COL9A3	2.15343356	4.90E-31	1.50E-28
EZR	0.113693806	0.098999887	0.180507974
MYL6	0.049275698	0.393714096	0.528800717
AGO1	0.388864138	3.42E-16	1.62E-14
TEKT2	-0.617943494	1.39E-05	8.23E-05
CLSPN	0.276469982	0.004674777	0.014080641
RFFL	-0.053635156	0.345908492	0.479039559
UNC13D	0.775150498	2.74E-13	7.72E-12
MFSD11	0.017867612	0.711419758	0.8032351
DPYSL2	0.200001687	0.038084395	0.082505878
TGFB2	-0.25034887	0.06543754	0.128995395
GPATCH2	-0.041942072	0.443580738	0.576245917
NUP50	0.00840927	0.860993855	0.908449672
CDC45	0.335774747	9.47E-06	5.82E-05
COMT	-0.249122603	0.000342856	0.001432617
ADA2	-0.338772134	0.001074347	0.003914719
AC016026.1	0.073343473	0.573389373	0.692927037
VNN3	-1.253998335	2.53E-10	4.07E-09
ECHDC1	0.152844919	0.014901268	0.03780805
LRRFIP2	-0.061387061	0.224265309	0.344941978
[truncated: 54,494 more rows]
