# Supplementary material for: Identification of Claudin-6 as a Molecular Biomarker in Pan-Cancer Through Multiple Omics Integrative Analysis
Source: Front Cell Dev Biol. 2021 Aug 2;9:726656. doi: 10.3389/fcell.2021.726656 (PMC8365468; doi:10.3389/fcell.2021.726656)
Supplement: Supplementary file 11 [file Data_Sheet_1.ZIP › data/string_interactions of 50 targeted binding proteins.tsv]

#node1	node2	node1_string_id	node2_string_id	neighborhood_on_chromosome	gene_fusion	phylogenetic_cooccurrence	homology	coexpression	experimentally_determined_interaction	database_annotated	automated_textmining	combined_score
BPIFB2	CLDN6	9606.ENSP00000170150	9606.ENSP00000380131	0	0	0	0	0.089	0	0	0.555	0.577
BPIFB2	YLPM1	9606.ENSP00000170150	9606.ENSP00000324463	0	0	0	0	0	0	0	0.748	0.748
CD81	SCARB1	9606.ENSP00000263645	9606.ENSP00000261693	0	0	0	0	0	0.049	0	0.792	0.794
CD81	CLDN9	9606.ENSP00000263645	9606.ENSP00000398017	0	0	0	0	0	0	0	0.473	0.473
CD81	CLDN6	9606.ENSP00000263645	9606.ENSP00000380131	0	0	0	0	0	0	0	0.48	0.48
CD81	CLDN7	9606.ENSP00000263645	9606.ENSP00000353475	0	0	0	0	0	0	0	0.528	0.528
CD81	OCLN	9606.ENSP00000263645	9606.ENSP00000347379	0	0	0	0	0	0	0	0.737	0.737
CD81	CLDN1	9606.ENSP00000263645	9606.ENSP00000295522	0	0	0	0	0	0	0	0.935	0.935
CLDN1	CLDN11	9606.ENSP00000295522	9606.ENSP00000064724	0	0	0	0.802	0	0	0.9	0.613	0.911
CLDN1	CLDN18	9606.ENSP00000295522	9606.ENSP00000183605	0	0	0	0.852	0.063	0	0.9	0.534	0.909
CLDN1	SCARB1	9606.ENSP00000295522	9606.ENSP00000261693	0	0	0	0	0	0	0	0.733	0.733
CLDN1	CLDN16	9606.ENSP00000295522	9606.ENSP00000264734	0	0	0	0.702	0.061	0	0.9	0.656	0.92
CLDN1	ESAM	9606.ENSP00000295522	9606.ENSP00000278927	0	0	0	0	0.057	0	0.6	0.146	0.65
CLDN1	TJP1	9606.ENSP00000295522	9606.ENSP00000281537	0	0	0	0	0.088	0.44	0	0.81	0.895
CLDN1	CLDN17	9606.ENSP00000295522	9606.ENSP00000286808	0	0	0	0.906	0.063	0	0.9	0.384	0.905
CLDN1	CLDN12	9606.ENSP00000295522	9606.ENSP00000287916	0	0	0	0	0.065	0	0.9	0.746	0.974
CLDN1	ESRP1	9606.ENSP00000295522	9606.ENSP00000405738	0	0	0	0	0.447	0	0	0.113	0.489
CLDN1	CLDN24	9606.ENSP00000295522	9606.ENSP00000438400	0	0	0	0.841	0	0	0.6	0.281	0.615
CLDN1	CLDN25	9606.ENSP00000295522	9606.ENSP00000396304	0	0	0	0.801	0	0	0.6	0.398	0.629
CLDN1	INADL	9606.ENSP00000295522	9606.ENSP00000360200	0	0	0	0	0.062	0.434	0	0.529	0.728
CLDN1	TJP3	9606.ENSP00000295522	9606.ENSP00000465419	0	0	0	0	0.077	0.44	0	0.755	0.863
CLDN1	TJP2	9606.ENSP00000295522	9606.ENSP00000438262	0	0	0	0	0	0.44	0	0.767	0.864
CLDN1	CLDN22	9606.ENSP00000295522	9606.ENSP00000318113	0	0	0	0.828	0	0	0.9	0.192	0.902
CLDN1	CLDN19	9606.ENSP00000295522	9606.ENSP00000296387	0	0	0	0.958	0.063	0	0.9	0.591	0.904
CLDN1	CLDN20	9606.ENSP00000295522	9606.ENSP00000356133	0	0	0	0.871	0.063	0	0.9	0.3	0.905
CLDN1	CLDN14	9606.ENSP00000295522	9606.ENSP00000382090	0	0	0	0.922	0.062	0	0.9	0.627	0.906
CLDN1	CLDN6	9606.ENSP00000295522	9606.ENSP00000380131	0	0	0	0.928	0.063	0	0.9	0.707	0.907
CLDN1	CLDN5	9606.ENSP00000295522	9606.ENSP00000385477	0	0	0	0.924	0.063	0	0.9	0.782	0.908
CLDN1	CLDN7	9606.ENSP00000295522	9606.ENSP00000353475	0	0	0	0.964	0.097	0	0.9	0.756	0.908
CLDN1	CLDN8	9606.ENSP00000295522	9606.ENSP00000382783	0	0	0	0.906	0.063	0	0.9	0.8	0.909
CLDN1	CLDN15	9606.ENSP00000295522	9606.ENSP00000385300	0	0	0	0.854	0.063	0	0.9	0.601	0.91
CLDN1	CLDN10	9606.ENSP00000295522	9606.ENSP00000299339	0	0	0	0.862	0.063	0	0.9	0.597	0.91
CLDN1	CLDN4	9606.ENSP00000295522	9606.ENSP00000409544	0	0	0	0.941	0.108	0	0.9	0.839	0.911
CLDN1	CLDN2	9606.ENSP00000295522	9606.ENSP00000441283	0	0	0	0.884	0.099	0	0.9	0.827	0.914
CLDN1	CLDN9	9606.ENSP00000295522	9606.ENSP00000398017	0	0	0	0.937	0.145	0	0.9	0.836	0.915
CLDN1	CLDN23	9606.ENSP00000295522	9606.ENSP00000428780	0	0	0	0.673	0.07	0	0.9	0.48	0.917
CLDN1	OCLN	9606.ENSP00000295522	9606.ENSP00000347379	0	0	0	0	0.061	0	0.6	0.869	0.946
CLDN1	CLDN3	9606.ENSP00000295522	9606.ENSP00000378577	0	0	0	0.936	0.176	0.379	0.9	0.828	0.947
CLDN10	CLDN11	9606.ENSP00000299339	9606.ENSP00000064724	0	0	0	0.761	0.063	0	0.9	0.598	0.915
CLDN10	CLDN18	9606.ENSP00000299339	9606.ENSP00000183605	0	0	0	0.83	0	0.299	0.9	0.64	0.934
CLDN10	CLDN16	9606.ENSP00000299339	9606.ENSP00000264734	0	0	0	0.635	0	0	0.9	0.694	0.924
CLDN10	ESAM	9606.ENSP00000299339	9606.ENSP00000278927	0	0	0	0	0.061	0	0.6	0.058	0.615
CLDN10	TJP1	9606.ENSP00000299339	9606.ENSP00000281537	0	0	0	0	0	0.072	0	0.425	0.443
CLDN10	CLDN17	9606.ENSP00000299339	9606.ENSP00000286808	0	0	0	0.785	0.06	0	0.9	0.549	0.913
CLDN10	CLDN12	9606.ENSP00000299339	9606.ENSP00000287916	0	0	0	0	0	0	0.9	0.524	0.95
CLDN10	CLDN19	9606.ENSP00000299339	9606.ENSP00000296387	0	0	0	0.883	0	0	0.9	0.702	0.908
CLDN10	TJP2	9606.ENSP00000299339	9606.ENSP00000438262	0	0	0	0	0	0.072	0	0.427	0.446
CLDN10	TJP3	9606.ENSP00000299339	9606.ENSP00000465419	0	0	0	0	0.061	0.072	0	0.449	0.478
CLDN10	CLDN25	9606.ENSP00000299339	9606.ENSP00000396304	0	0	0	0.667	0	0	0.6	0.188	0.62
CLDN10	CLDN24	9606.ENSP00000299339	9606.ENSP00000438400	0	0	0	0.774	0	0	0.6	0.401	0.633
CLDN10	OCLN	9606.ENSP00000299339	9606.ENSP00000347379	0	0	0	0	0.062	0	0.6	0.522	0.805
CLDN10	CLDN15	9606.ENSP00000299339	9606.ENSP00000385300	0	0	0	0.916	0	0	0.9	0.658	0.905
CLDN10	CLDN20	9606.ENSP00000299339	9606.ENSP00000356133	0	0	0	0.785	0	0	0.9	0.304	0.905
CLDN10	CLDN22	9606.ENSP00000299339	9606.ENSP00000318113	0	0	0	0.769	0	0	0.9	0.352	0.907
CLDN10	CLDN7	9606.ENSP00000299339	9606.ENSP00000353475	0	0	0	0.885	0.062	0	0.9	0.604	0.908
CLDN10	CLDN9	9606.ENSP00000299339	9606.ENSP00000398017	0	0	0	0.851	0.064	0	0.9	0.517	0.909
CLDN10	CLDN4	9606.ENSP00000299339	9606.ENSP00000409544	0	0	0	0.852	0	0	0.9	0.677	0.909
CLDN10	CLDN3	9606.ENSP00000299339	9606.ENSP00000378577	0	0	0	0.858	0.064	0	0.9	0.602	0.91
CLDN10	CLDN5	9606.ENSP00000299339	9606.ENSP00000385477	0	0	0	0.837	0.062	0	0.9	0.516	0.91
CLDN10	CLDN6	9606.ENSP00000299339	9606.ENSP00000380131	0	0	0	0.84	0.066	0	0.9	0.584	0.911
CLDN10	CLDN8	9606.ENSP00000299339	9606.ENSP00000382783	0	0	0	0.839	0.062	0	0.9	0.63	0.911
CLDN10	CLDN14	9606.ENSP00000299339	9606.ENSP00000382090	0	0	0	0.825	0.063	0	0.9	0.61	0.912
CLDN10	CLDN2	9606.ENSP00000299339	9606.ENSP00000441283	0	0	0	0.792	0	0	0.9	0.698	0.914
CLDN10	CLDN23	9606.ENSP00000299339	9606.ENSP00000428780	0	0	0	0	0.064	0	0.9	0.486	0.947
CLDN11	TJP2	9606.ENSP00000064724	9606.ENSP00000438262	0	0	0	0	0.061	0	0	0.464	0.475
CLDN11	TJP3	9606.ENSP00000064724	9606.ENSP00000465419	0	0	0	0	0	0	0	0.493	0.493
CLDN11	CLDN24	9606.ENSP00000064724	9606.ENSP00000438400	0	0	0	0.702	0	0	0.6	0.212	0.621
CLDN11	TJP1	9606.ENSP00000064724	9606.ENSP00000281537	0	0	0	0	0.046	0	0	0.624	0.625
CLDN11	CLDN25	9606.ENSP00000064724	9606.ENSP00000396304	0	0	0	0	0	0	0.6	0.104	0.626
CLDN11	ESAM	9606.ENSP00000064724	9606.ENSP00000278927	0	0	0	0	0	0	0.6	0.184	0.659
CLDN11	OCLN	9606.ENSP00000064724	9606.ENSP00000347379	0	0	0	0	0	0	0.6	0.705	0.877
CLDN11	CLDN20	9606.ENSP00000064724	9606.ENSP00000356133	0	0	0	0.669	0.062	0	0.9	0.226	0.908
CLDN11	CLDN7	9606.ENSP00000064724	9606.ENSP00000353475	0	0	0	0.78	0	0	0.9	0.489	0.91
CLDN11	CLDN22	9606.ENSP00000064724	9606.ENSP00000318113	0	0	0	0.669	0	0	0.9	0.386	0.911
CLDN11	CLDN17	9606.ENSP00000064724	9606.ENSP00000286808	0	0	0	0.657	0	0	0.9	0.374	0.911
CLDN11	CLDN15	9606.ENSP00000064724	9606.ENSP00000385300	0	0	0	0.742	0	0	0.9	0.542	0.913
CLDN11	CLDN8	9606.ENSP00000064724	9606.ENSP00000382783	0	0	0	0.694	0	0	0.9	0.455	0.913
CLDN11	CLDN18	9606.ENSP00000064724	9606.ENSP00000183605	0	0	0	0.762	0	0	0.9	0.608	0.914
CLDN11	CLDN4	9606.ENSP00000064724	9606.ENSP00000409544	0	0	0	0.684	0	0	0.9	0.524	0.915
CLDN11	CLDN9	9606.ENSP00000064724	9606.ENSP00000398017	0	0	0	0.711	0	0	0.9	0.578	0.916
CLDN11	CLDN3	9606.ENSP00000064724	9606.ENSP00000378577	0	0	0	0.724	0	0	0.9	0.626	0.916
CLDN11	CLDN19	9606.ENSP00000064724	9606.ENSP00000296387	0	0	0	0.782	0	0	0.9	0.746	0.916
CLDN11	CLDN2	9606.ENSP00000064724	9606.ENSP00000441283	0	0	0	0.687	0	0	0.9	0.569	0.917
CLDN11	CLDN6	9606.ENSP00000064724	9606.ENSP00000380131	0	0	0	0.685	0	0	0.9	0.58	0.917
CLDN11	CLDN5	9606.ENSP00000064724	9606.ENSP00000385477	0	0	0	0.729	0.084	0	0.9	0.596	0.919
CLDN11	CLDN16	9606.ENSP00000064724	9606.ENSP00000264734	0	0	0	0.665	0	0	0.9	0.642	0.92
CLDN11	CLDN14	9606.ENSP00000064724	9606.ENSP00000382090	0	0	0	0.708	0.088	0	0.9	0.642	0.922
CLDN11	CLDN23	9606.ENSP00000064724	9606.ENSP00000428780	0	0	0	0	0	0	0.9	0.501	0.947
CLDN11	CLDN12	9606.ENSP00000064724	9606.ENSP00000287916	0	0	0	0	0	0	0.9	0.581	0.956
CLDN12	CLDN18	9606.ENSP00000287916	9606.ENSP00000183605	0	0	0	0	0	0	0.9	0.589	0.957
CLDN12	CLDN16	9606.ENSP00000287916	9606.ENSP00000264734	0	0	0	0	0	0	0.9	0.626	0.961
CLDN12	TJP1	9606.ENSP00000287916	9606.ENSP00000281537	0	0	0	0	0.099	0	0	0.65	0.672
CLDN12	CLDN17	9606.ENSP00000287916	9606.ENSP00000286808	0	0	0	0	0	0	0.9	0.646	0.963
CLDN12	CLDN25	9606.ENSP00000287916	9606.ENSP00000396304	0	0	0	0	0	0	0	0.512	0.512
CLDN12	TJP3	9606.ENSP00000287916	9606.ENSP00000465419	0	0	0	0	0	0	0	0.548	0.548
CLDN12	TJP2	9606.ENSP00000287916	9606.ENSP00000438262	0	0	0	0	0.061	0	0	0.625	0.633
CLDN12	OCLN	9606.ENSP00000287916	9606.ENSP00000347379	0	0	0	0	0.062	0	0	0.695	0.702
CLDN12	CLDN22	9606.ENSP00000287916	9606.ENSP00000318113	0	0	0	0	0	0	0.9	0.458	0.943
CLDN12	CLDN20	9606.ENSP00000287916	9606.ENSP00000356133	0	0	0	0	0	0	0.9	0.463	0.944
CLDN12	CLDN14	9606.ENSP00000287916	9606.ENSP00000382090	0	0	0	0	0	0	0.9	0.532	0.951
CLDN12	CLDN23	9606.ENSP00000287916	9606.ENSP00000428780	0	0	0	0	0	0	0.9	0.546	0.952
CLDN12	CLDN9	9606.ENSP00000287916	9606.ENSP00000398017	0	0	0	0	0	0	0.9	0.562	0.954
CLDN12	CLDN19	9606.ENSP00000287916	9606.ENSP00000296387	0	0	0	0	0	0	0.9	0.606	0.958
CLDN12	CLDN6	9606.ENSP00000287916	9606.ENSP00000380131	0	0	0	0	0	0	0.9	0.628	0.961
CLDN12	CLDN7	9606.ENSP00000287916	9606.ENSP00000353475	0	0	0	0	0	0	0.9	0.626	0.961
CLDN12	CLDN15	9606.ENSP00000287916	9606.ENSP00000385300	0	0	0	0	0	0	0.9	0.734	0.972
CLDN12	CLDN5	9606.ENSP00000287916	9606.ENSP00000385477	0	0	0	0	0	0	0.9	0.773	0.976
CLDN12	CLDN2	9606.ENSP00000287916	9606.ENSP00000441283	0	0	0	0	0.061	0	0.9	0.782	0.977
CLDN12	CLDN4	9606.ENSP00000287916	9606.ENSP00000409544	0	0	0	0	0	0	0.9	0.806	0.979
CLDN12	CLDN3	9606.ENSP00000287916	9606.ENSP00000378577	0	0	0	0	0	0	0.9	0.804	0.979
CLDN12	CLDN8	9606.ENSP00000287916	9606.ENSP00000382783	0	0	0	0	0	0	0.9	0.805	0.979
CLDN14	CLDN18	9606.ENSP00000382090	9606.ENSP00000183605	0	0	0	0.794	0	0	0.9	0.462	0.909
CLDN14	CLDN16	9606.ENSP00000382090	9606.ENSP00000264734	0	0	0	0.627	0.088	0	0.9	0.857	0.935
CLDN14	ESAM	9606.ENSP00000382090	9606.ENSP00000278927	0	0	0	0	0	0	0.6	0.049	0.603
CLDN14	TJP1	9606.ENSP00000382090	9606.ENSP00000281537	0	0	0	0	0	0	0	0.467	0.467
CLDN14	CLDN17	9606.ENSP00000382090	9606.ENSP00000286808	0	0	0	0.887	0.064	0	0.9	0.661	0.909
CLDN14	CLDN19	9606.ENSP00000382090	9606.ENSP00000296387	0	0	0	0.913	0.061	0	0.9	0.734	0.908
CLDN14	CLDN22	9606.ENSP00000382090	9606.ENSP00000318113	0	0	0	0.784	0.062	0	0.9	0.073	0.902
CLDN14	OCLN	9606.ENSP00000382090	9606.ENSP00000347379	0	0	0	0	0	0	0.6	0.539	0.807
CLDN14	CLDN7	9606.ENSP00000382090	9606.ENSP00000353475	0	0	0	0.916	0	0	0.9	0.577	0.904
CLDN14	CLDN20	9606.ENSP00000382090	9606.ENSP00000356133	0	0	0	0.896	0	0	0.9	0.255	0.902
CLDN14	CLDN3	9606.ENSP00000382090	9606.ENSP00000378577	0	0	0	0.921	0.063	0	0.9	0.621	0.906
CLDN14	CLDN6	9606.ENSP00000382090	9606.ENSP00000380131	0	0	0	0.902	0	0	0.9	0.596	0.905
CLDN14	TJP2	9606.ENSP00000382090	9606.ENSP00000438262	0	0	0	0	0	0	0	0.478	0.478
CLDN14	CLDN25	9606.ENSP00000382090	9606.ENSP00000396304	0	0	0	0.751	0.061	0	0.6	0	0.608
CLDN14	CLDN24	9606.ENSP00000382090	9606.ENSP00000438400	0	0	0	0.802	0.062	0	0.6	0.376	0.635
CLDN14	CLDN4	9606.ENSP00000382090	9606.ENSP00000409544	0	0	0	0.928	0	0	0.9	0.643	0.904
CLDN14	CLDN2	9606.ENSP00000382090	9606.ENSP00000441283	0	0	0	0.934	0.064	0	0.9	0.638	0.906
CLDN14	CLDN9	9606.ENSP00000382090	9606.ENSP00000398017	0	0	0	0.918	0.063	0	0.9	0.725	0.908
CLDN14	CLDN5	9606.ENSP00000382090	9606.ENSP00000385477	0	0	0	0.866	0.061	0	0.9	0.491	0.908
CLDN14	CLDN15	9606.ENSP00000382090	9606.ENSP00000385300	0	0	0	0.829	0	0	0.9	0.573	0.909
CLDN14	CLDN8	9606.ENSP00000382090	9606.ENSP00000382783	0	0	0	0.883	0.064	0	0.9	0.637	0.909
CLDN14	CLDN23	9606.ENSP00000382090	9606.ENSP00000428780	0	0	0	0.646	0	0	0.9	0.539	0.918
CLDN15	CLDN18	9606.ENSP00000385300	9606.ENSP00000183605	0	0	0	0.782	0.061	0	0.9	0.492	0.912
CLDN15	CLDN16	9606.ENSP00000385300	9606.ENSP00000264734	0	0	0	0.656	0	0	0.9	0.636	0.921
CLDN15	ESAM	9606.ENSP00000385300	9606.ENSP00000278927	0	0	0	0	0.061	0	0.6	0.238	0.688
CLDN15	TJP1	9606.ENSP00000385300	9606.ENSP00000281537	0	0	0	0	0	0.072	0	0.563	0.577
CLDN15	CLDN17	9606.ENSP00000385300	9606.ENSP00000286808	0	0	0	0.815	0	0	0.9	0.583	0.91
CLDN15	CLDN19	9606.ENSP00000385300	9606.ENSP00000296387	0	0	0	0.88	0	0	0.9	0.635	0.907
CLDN15	CLDN22	9606.ENSP00000385300	9606.ENSP00000318113	0	0	0	0.732	0	0	0.9	0.293	0.907
CLDN15	OCLN	9606.ENSP00000385300	9606.ENSP00000347379	0	0	0	0	0.062	0	0.6	0.65	0.857
CLDN15	CLDN7	9606.ENSP00000385300	9606.ENSP00000353475	0	0	0	0.879	0	0	0.9	0.65	0.907
CLDN15	CLDN20	9606.ENSP00000385300	9606.ENSP00000356133	0	0	0	0.772	0	0	0.9	0.168	0.903
CLDN15	CLDN3	9606.ENSP00000385300	9606.ENSP00000378577	0	0	0	0.865	0	0	0.9	0.688	0.909
CLDN15	CLDN6	9606.ENSP00000385300	9606.ENSP00000380131	0	0	0	0.827	0	0	0.9	0.538	0.908
CLDN15	CLDN8	9606.ENSP00000385300	9606.ENSP00000382783	0	0	0	0.818	0.057	0	0.9	0.609	0.912
CLDN15	TJP3	9606.ENSP00000385300	9606.ENSP00000465419	0	0	0	0	0	0.072	0	0.399	0.418
CLDN15	TJP2	9606.ENSP00000385300	9606.ENSP00000438262	0	0	0	0	0	0.072	0	0.483	0.5
CLDN15	CLDN24	9606.ENSP00000385300	9606.ENSP00000438400	0	0	0	0.749	0	0	0.6	0.257	0.622
CLDN15	CLDN25	9606.ENSP00000385300	9606.ENSP00000396304	0	0	0	0.718	0	0	0.6	0.398	0.641
CLDN15	CLDN9	9606.ENSP00000385300	9606.ENSP00000398017	0	0	0	0.842	0	0	0.9	0.228	0.903
CLDN15	CLDN4	9606.ENSP00000385300	9606.ENSP00000409544	0	0	0	0.864	0	0	0.9	0.709	0.909
CLDN15	CLDN5	9606.ENSP00000385300	9606.ENSP00000385477	0	0	0	0.82	0	0	0.9	0.566	0.909
CLDN15	CLDN2	9606.ENSP00000385300	9606.ENSP00000441283	0	0	0	0.806	0.061	0	0.9	0.769	0.916
CLDN15	CLDN23	9606.ENSP00000385300	9606.ENSP00000428780	0	0	0	0.646	0.064	0	0.9	0.651	0.924
CLDN16	CLDN18	9606.ENSP00000264734	9606.ENSP00000183605	0	0	0	0.61	0	0	0.9	0.522	0.919
CLDN16	TJP2	9606.ENSP00000264734	9606.ENSP00000438262	0	0	0	0	0	0	0	0.466	0.466
CLDN16	TJP3	9606.ENSP00000264734	9606.ENSP00000465419	0	0	0	0	0	0	0	0.481	0.481
CLDN16	ESAM	9606.ENSP00000264734	9606.ENSP00000278927	0	0	0	0	0	0	0.6	0.105	0.626
CLDN16	CLDN24	9606.ENSP00000264734	9606.ENSP00000438400	0	0	0	0.641	0.06	0	0.6	0.398	0.66
CLDN16	CLDN25	9606.ENSP00000264734	9606.ENSP00000396304	0	0	0	0	0	0	0.6	0.302	0.709
CLDN16	OCLN	9606.ENSP00000264734	9606.ENSP00000347379	0	0	0	0	0	0	0.6	0.498	0.79
CLDN16	TJP1	9606.ENSP00000264734	9606.ENSP00000281537	0	0	0	0	0	0.379	0	0.695	0.802
CLDN16	CLDN22	9606.ENSP00000264734	9606.ENSP00000318113	0	0	0	0.627	0.06	0	0.9	0.146	0.905
CLDN16	CLDN20	9606.ENSP00000264734	9606.ENSP00000356133	0	0	0	0.639	0	0	0.9	0.446	0.915
CLDN16	CLDN7	9606.ENSP00000264734	9606.ENSP00000353475	0	0	0	0.71	0	0	0.9	0.577	0.916
CLDN16	CLDN4	9606.ENSP00000264734	9606.ENSP00000409544	0	0	0	0.689	0	0	0.9	0.63	0.919
CLDN16	CLDN6	9606.ENSP00000264734	9606.ENSP00000380131	0	0	0	0.63	0	0	0.9	0.576	0.92
CLDN16	CLDN9	9606.ENSP00000264734	9606.ENSP00000398017	0	0	0	0.652	0.061	0	0.9	0.587	0.921
CLDN16	CLDN5	9606.ENSP00000264734	9606.ENSP00000385477	0	0	0	0.604	0	0	0.9	0.632	0.924
CLDN16	CLDN2	9606.ENSP00000264734	9606.ENSP00000441283	0	0	0	0.623	0	0	0.9	0.726	0.926
CLDN16	CLDN3	9606.ENSP00000264734	9606.ENSP00000378577	0	0	0	0.653	0.061	0	0.9	0.735	0.926
CLDN16	CLDN8	9606.ENSP00000264734	9606.ENSP00000382783	0	0	0	0.637	0.061	0	0.9	0.699	0.926
CLDN16	CLDN23	9606.ENSP00000264734	9606.ENSP00000428780	0	0	0	0	0	0	0.9	0.448	0.942
CLDN16	CLDN19	9606.ENSP00000264734	9606.ENSP00000296387	0	0	0	0.634	0	0.379	0.9	0.952	0.957
CLDN16	CLDN17	9606.ENSP00000264734	9606.ENSP00000286808	0	0	0	0	0.061	0	0.9	0.608	0.96
CLDN17	CLDN18	9606.ENSP00000286808	9606.ENSP00000183605	0	0	0	0.779	0	0	0.9	0.477	0.91
CLDN17	ESAM	9606.ENSP00000286808	9606.ENSP00000278927	0	0	0	0	0.056	0	0.6	0.071	0.618
CLDN17	CLDN24	9606.ENSP00000286808	9606.ENSP00000438400	0	0	0	0.782	0.062	0	0.6	0.595	0.658
CLDN17	CLDN25	9606.ENSP00000286808	9606.ENSP00000396304	0	0	0	0.74	0.061	0	0.6	0.53	0.66
CLDN17	OCLN	9606.ENSP00000286808	9606.ENSP00000347379	0	0	0	0	0.062	0	0.6	0.269	0.701
CLDN17	CLDN5	9606.ENSP00000286808	9606.ENSP00000385477	0	0	0	0.884	0	0	0.9	0.358	0.903
CLDN17	CLDN9	9606.ENSP00000286808	9606.ENSP00000398017	0	0	0	0.929	0.061	0	0.9	0.501	0.905
CLDN17	CLDN7	9606.ENSP00000286808	9606.ENSP00000353475	0	0	0	0.905	0.062	0	0.9	0.433	0.905
CLDN17	CLDN4	9606.ENSP00000286808	9606.ENSP00000409544	0	0	0	0.927	0.061	0	0.9	0.55	0.905
CLDN17	CLDN3	9606.ENSP00000286808	9606.ENSP00000378577	0	0	0	0.926	0.061	0	0.9	0.516	0.905
CLDN17	CLDN8	9606.ENSP00000286808	9606.ENSP00000382783	0	0	0	0.959	0.063	0	0.9	0.752	0.905
CLDN17	CLDN19	9606.ENSP00000286808	9606.ENSP00000296387	0	0	0	0.89	0.061	0	0.9	0.431	0.906
CLDN17	CLDN6	9606.ENSP00000286808	9606.ENSP00000380131	0	0	0	0.919	0.055	0	0.9	0.614	0.906
CLDN17	CLDN2	9606.ENSP00000286808	9606.ENSP00000441283	0	0	0	0.861	0.061	0	0.9	0.564	0.909
CLDN17	CLDN20	9606.ENSP00000286808	9606.ENSP00000356133	0	0	0	0.803	0	0	0.9	0.515	0.909
CLDN17	CLDN22	9606.ENSP00000286808	9606.ENSP00000318113	0	0	0	0.792	0.062	0	0.9	0.504	0.912
CLDN17	CLDN23	9606.ENSP00000286808	9606.ENSP00000428780	0	0	0	0.656	0.064	0	0.9	0.486	0.917
CLDN18	TJP1	9606.ENSP00000183605	9606.ENSP00000281537	0	0	0	0	0	0.072	0	0.457	0.474
CLDN18	TJP2	9606.ENSP00000183605	9606.ENSP00000438262	0	0	0	0	0	0.072	0	0.492	0.509
CLDN18	ESAM	9606.ENSP00000183605	9606.ENSP00000278927	0	0	0	0	0.062	0	0.6	0.041	0.608
CLDN18	CLDN24	9606.ENSP00000183605	9606.ENSP00000438400	0	0	0	0.798	0	0	0.6	0.24	0.616
CLDN18	CLDN25	9606.ENSP00000183605	9606.ENSP00000396304	0	0	0	0.69	0	0	0.6	0.354	0.64
CLDN18	OCLN	9606.ENSP00000183605	9606.ENSP00000347379	0	0	0	0	0.062	0	0.6	0.526	0.806
CLDN18	CLDN22	9606.ENSP00000183605	9606.ENSP00000318113	0	0	0	0.789	0	0	0.9	0.27	0.905
CLDN18	CLDN7	9606.ENSP00000183605	9606.ENSP00000353475	0	0	0	0.855	0	0	0.9	0.563	0.907
CLDN18	CLDN20	9606.ENSP00000183605	9606.ENSP00000356133	0	0	0	0.77	0	0	0.9	0.356	0.907
CLDN18	CLDN9	9606.ENSP00000183605	9606.ENSP00000398017	0	0	0	0.799	0.049	0	0.9	0.491	0.91
CLDN18	CLDN6	9606.ENSP00000183605	9606.ENSP00000380131	0	0	0	0.816	0	0	0.9	0.582	0.91
CLDN18	CLDN8	9606.ENSP00000183605	9606.ENSP00000382783	0	0	0	0.787	0	0	0.9	0.508	0.91
CLDN18	CLDN4	9606.ENSP00000183605	9606.ENSP00000409544	0	0	0	0.834	0	0	0.9	0.677	0.911
CLDN18	CLDN3	9606.ENSP00000183605	9606.ENSP00000378577	0	0	0	0.84	0.061	0	0.9	0.689	0.912
CLDN18	CLDN2	9606.ENSP00000183605	9606.ENSP00000441283	0	0	0	0.745	0	0	0.9	0.572	0.914
CLDN18	CLDN5	9606.ENSP00000183605	9606.ENSP00000385477	0	0	0	0.755	0.061	0	0.9	0.681	0.918
CLDN18	CLDN19	9606.ENSP00000183605	9606.ENSP00000296387	0	0	0	0.864	0	0.379	0.9	0.498	0.939
CLDN18	CLDN23	9606.ENSP00000183605	9606.ENSP00000428780	0	0	0	0	0.064	0	0.9	0.509	0.95
CLDN19	ESAM	9606.ENSP00000296387	9606.ENSP00000278927	0	0	0	0	0.056	0	0.6	0.119	0.638
CLDN19	TJP1	9606.ENSP00000296387	9606.ENSP00000281537	0	0	0	0	0	0.072	0	0.56	0.574
CLDN19	TJP3	9606.ENSP00000296387	9606.ENSP00000465419	0	0	0	0	0	0.072	0	0.434	0.452
CLDN19	TJP2	9606.ENSP00000296387	9606.ENSP00000438262	0	0	0	0	0	0.072	0	0.565	0.579
CLDN19	CLDN24	9606.ENSP00000296387	9606.ENSP00000438400	0	0	0	0.816	0	0	0.6	0.566	0.64
CLDN19	CLDN25	9606.ENSP00000296387	9606.ENSP00000396304	0	0	0	0.768	0.061	0	0.6	0.448	0.646
CLDN19	OCLN	9606.ENSP00000296387	9606.ENSP00000347379	0	0	0	0	0.062	0	0.6	0.538	0.811
CLDN19	CLDN7	9606.ENSP00000296387	9606.ENSP00000353475	0	0	0	0.954	0.061	0	0.9	0.473	0.904
CLDN19	CLDN5	9606.ENSP00000296387	9606.ENSP00000385477	0	0	0	0.908	0	0	0.9	0.548	0.904
CLDN19	CLDN9	9606.ENSP00000296387	9606.ENSP00000398017	0	0	0	0.922	0.063	0	0.9	0.502	0.905
CLDN19	CLDN2	9606.ENSP00000296387	9606.ENSP00000441283	0	0	0	0.893	0	0	0.9	0.636	0.906
CLDN19	CLDN4	9606.ENSP00000296387	9606.ENSP00000409544	0	0	0	0.924	0.062	0	0.9	0.583	0.906
CLDN19	CLDN20	9606.ENSP00000296387	9606.ENSP00000356133	0	0	0	0.862	0	0	0.9	0.543	0.907
CLDN19	CLDN3	9606.ENSP00000296387	9606.ENSP00000378577	0	0	0	0.919	0.063	0	0.9	0.761	0.908
CLDN19	CLDN8	9606.ENSP00000296387	9606.ENSP00000382783	0	0	0	0.89	0.061	0	0.9	0.636	0.908
CLDN19	CLDN6	9606.ENSP00000296387	9606.ENSP00000380131	0	0	0	0.909	0.088	0	0.9	0.503	0.909
CLDN19	CLDN22	9606.ENSP00000296387	9606.ENSP00000318113	0	0	0	0.806	0	0	0.9	0.541	0.91
CLDN19	CLDN23	9606.ENSP00000296387	9606.ENSP00000428780	0	0	0	0.636	0.064	0	0.9	0.429	0.916
CLDN2	ESAM	9606.ENSP00000441283	9606.ENSP00000278927	0	0	0	0	0.056	0	0.6	0.162	0.656
CLDN2	TJP1	9606.ENSP00000441283	9606.ENSP00000281537	0	0	0	0	0	0.47	0	0.88	0.933
CLDN2	CLDN22	9606.ENSP00000441283	9606.ENSP00000318113	0	0	0	0.767	0	0	0.9	0.34	0.907
CLDN2	OCLN	9606.ENSP00000441283	9606.ENSP00000347379	0	0	0	0	0.062	0	0.6	0.864	0.944
CLDN2	CLDN7	9606.ENSP00000441283	9606.ENSP00000353475	0	0	0	0.895	0.075	0	0.9	0.742	0.911
CLDN2	CLDN20	9606.ENSP00000441283	9606.ENSP00000356133	0	0	0	0.874	0	0	0.9	0.361	0.904
CLDN2	CLDN3	9606.ENSP00000441283	9606.ENSP00000378577	0	0	0	0.906	0.097	0	0.9	0.83	0.913
CLDN2	CLDN6	9606.ENSP00000441283	9606.ENSP00000380131	0	0	0	0.898	0	0	0.9	0.612	0.906
CLDN2	CLDN8	9606.ENSP00000441283	9606.ENSP00000382783	0	0	0	0.86	0.062	0	0.9	0.77	0.912
CLDN2	CLDN5	9606.ENSP00000441283	9606.ENSP00000385477	0	0	0	0.855	0.061	0	0.9	0.778	0.912
CLDN2	CLDN25	9606.ENSP00000441283	9606.ENSP00000396304	0	0	0	0.73	0	0	0.6	0.251	0.623
CLDN2	CLDN9	9606.ENSP00000441283	9606.ENSP00000398017	0	0	0	0.907	0.062	0	0.9	0.528	0.906
CLDN2	CLDN4	9606.ENSP00000441283	9606.ENSP00000409544	0	0	0	0.909	0.069	0	0.9	0.859	0.91
CLDN2	CLDN23	9606.ENSP00000441283	9606.ENSP00000428780	0	0	0	0.648	0.082	0	0.9	0.412	0.917
CLDN2	TJP2	9606.ENSP00000441283	9606.ENSP00000438262	0	0	0	0	0	0.452	0	0.709	0.834
CLDN2	CLDN24	9606.ENSP00000441283	9606.ENSP00000438400	0	0	0	0.775	0	0	0.6	0.583	0.65
CLDN2	TJP3	9606.ENSP00000441283	9606.ENSP00000465419	0	0	0	0	0.089	0.103	0	0.596	0.641
CLDN20	ESAM	9606.ENSP00000356133	9606.ENSP00000278927	0	0	0	0	0.056	0	0.6	0	0.606
CLDN20	CLDN22	9606.ENSP00000356133	9606.ENSP00000318113	0	0	0	0.714	0	0	0.9	0.342	0.908
CLDN20	OCLN	9606.ENSP00000356133	9606.ENSP00000347379	0	0	0	0	0.062	0	0.6	0.078	0.624
CLDN20	CLDN7	9606.ENSP00000356133	9606.ENSP00000353475	0	0	0	0.894	0	0	0.9	0.152	0.901
CLDN20	CLDN24	9606.ENSP00000356133	9606.ENSP00000438400	0	0	0	0.719	0	0	0.6	0.342	0.635
CLDN20	CLDN25	9606.ENSP00000356133	9606.ENSP00000396304	0	0	0	0.664	0	0	0.6	0.557	0.672
CLDN20	CLDN3	9606.ENSP00000356133	9606.ENSP00000378577	0	0	0	0.847	0	0	0.9	0.211	0.902
CLDN20	CLDN9	9606.ENSP00000356133	9606.ENSP00000398017	0	0	0	0.854	0	0	0.9	0.284	0.903
CLDN20	CLDN8	9606.ENSP00000356133	9606.ENSP00000382783	0	0	0	0.823	0	0	0.9	0.214	0.903
CLDN20	CLDN6	9606.ENSP00000356133	9606.ENSP00000380131	0	0	0	0.837	0	0	0.9	0.301	0.904
CLDN20	CLDN4	9606.ENSP00000356133	9606.ENSP00000409544	0	0	0	0.859	0	0	0.9	0.313	0.904
CLDN20	CLDN5	9606.ENSP00000356133	9606.ENSP00000385477	0	0	0	0.831	0	0	0.9	0.341	0.905
CLDN20	CLDN23	9606.ENSP00000356133	9606.ENSP00000428780	0	0	0	0	0.064	0	0.9	0.371	0.936
CLDN22	ESAM	9606.ENSP00000318113	9606.ENSP00000278927	0	0	0	0	0	0	0.6	0.153	0.647
CLDN22	CLDN25	9606.ENSP00000318113	9606.ENSP00000396304	0	0	0	0.938	0	0	0.6	0	0.6
CLDN22	CLDN24	9606.ENSP00000318113	9606.ENSP00000438400	0	0	0	0.982	0	0	0.6	0	0.6
CLDN22	OCLN	9606.ENSP00000318113	9606.ENSP00000347379	0	0	0	0	0	0	0.6	0.193	0.663
CLDN22	CLDN7	9606.ENSP00000318113	9606.ENSP00000353475	0	0	0	0.844	0	0	0.9	0.065	0.9
CLDN22	CLDN5	9606.ENSP00000318113	9606.ENSP00000385477	0	0	0	0.798	0	0	0.9	0.096	0.901
CLDN22	CLDN4	9606.ENSP00000318113	9606.ENSP00000409544	0	0	0	0.829	0	0	0.9	0.286	0.904
CLDN22	CLDN6	9606.ENSP00000318113	9606.ENSP00000380131	0	0	0	0.831	0	0	0.9	0.428	0.906
CLDN22	CLDN8	9606.ENSP00000318113	9606.ENSP00000382783	0	0	0	0.825	0.062	0	0.9	0.364	0.907
CLDN22	CLDN3	9606.ENSP00000318113	9606.ENSP00000378577	0	0	0	0.803	0.055	0	0.9	0.44	0.909
CLDN22	CLDN9	9606.ENSP00000318113	9606.ENSP00000398017	0	0	0	0.827	0.06	0	0.9	0.607	0.911
CLDN22	CLDN23	9606.ENSP00000318113	9606.ENSP00000428780	0	0	0	0	0	0	0.9	0.204	0.916
CLDN23	ESAM	9606.ENSP00000428780	9606.ENSP00000278927	0	0	0	0	0	0	0.6	0.054	0.605
CLDN23	OCLN	9606.ENSP00000428780	9606.ENSP00000347379	0	0	0	0	0.079	0	0.6	0.29	0.715
CLDN23	CLDN7	9606.ENSP00000428780	9606.ENSP00000353475	0	0	0	0.669	0.18	0	0.9	0.481	0.927
CLDN23	CLDN3	9606.ENSP00000428780	9606.ENSP00000378577	0	0	0	0.657	0.108	0	0.9	0.495	0.922
CLDN23	CLDN6	9606.ENSP00000428780	9606.ENSP00000380131	0	0	0	0.681	0.117	0	0.9	0.574	0.924
CLDN23	CLDN8	9606.ENSP00000428780	9606.ENSP00000382783	0	0	0	0.634	0.064	0	0.9	0.49	0.919
CLDN23	CLDN5	9606.ENSP00000428780	9606.ENSP00000385477	0	0	0	0	0.099	0	0.9	0.326	0.934
CLDN23	CLDN25	9606.ENSP00000428780	9606.ENSP00000396304	0	0	0	0.617	0	0	0.6	0.517	0.676
CLDN23	CLDN9	9606.ENSP00000428780	9606.ENSP00000398017	0	0	0	0.729	0.064	0	0.9	0.478	0.914
CLDN23	CLDN4	9606.ENSP00000428780	9606.ENSP00000409544	0	0	0	0.696	0.199	0	0.9	0.56	0.93
CLDN23	CLDN24	9606.ENSP00000428780	9606.ENSP00000438400	0	0	0	0.634	0	0	0.6	0.204	0.624
CLDN24	ESAM	9606.ENSP00000438400	9606.ENSP00000278927	0	0	0	0	0	0	0.6	0.051	0.604
CLDN24	OCLN	9606.ENSP00000438400	9606.ENSP00000347379	0	0	0	0	0	0	0.6	0.28	0.7
CLDN24	CLDN7	9606.ENSP00000438400	9606.ENSP00000353475	0	0	0	0.846	0	0	0.6	0.185	0.609
CLDN24	CLDN3	9606.ENSP00000438400	9606.ENSP00000378577	0	0	0	0.809	0.055	0	0.6	0.531	0.644
CLDN24	CLDN6	9606.ENSP00000438400	9606.ENSP00000380131	0	0	0	0.845	0	0	0.6	0.471	0.627
CLDN24	CLDN8	9606.ENSP00000438400	9606.ENSP00000382783	0	0	0	0.837	0.062	0	0.6	0.455	0.636
CLDN24	CLDN5	9606.ENSP00000438400	9606.ENSP00000385477	0	0	0	0.812	0	0	0.6	0.095	0.604
CLDN24	CLDN25	9606.ENSP00000438400	9606.ENSP00000396304	0	0	0	0.938	0	0	0.6	0	0.6
CLDN24	CLDN9	9606.ENSP00000438400	9606.ENSP00000398017	0	0	0	0.835	0.06	0	0.6	0.528	0.64
CLDN24	CLDN4	9606.ENSP00000438400	9606.ENSP00000409544	0	0	0	0.828	0	0	0.6	0.491	0.632
CLDN25	ESAM	9606.ENSP00000396304	9606.ENSP00000278927	0	0	0	0	0	0	0.6	0.042	0.6
CLDN25	OCLN	9606.ENSP00000396304	9606.ENSP00000347379	0	0	0	0	0	0	0.6	0.145	0.643
CLDN25	CLDN7	9606.ENSP00000396304	9606.ENSP00000353475	0	0	0	0.788	0	0	0.6	0.069	0.602
CLDN25	CLDN3	9606.ENSP00000396304	9606.ENSP00000378577	0	0	0	0.772	0.061	0	0.6	0.094	0.613
CLDN25	CLDN6	9606.ENSP00000396304	9606.ENSP00000380131	0	0	0	0.79	0	0	0.6	0.417	0.632
CLDN25	CLDN8	9606.ENSP00000396304	9606.ENSP00000382783	0	0	0	0.761	0.061	0	0.6	0.348	0.638
CLDN25	CLDN5	9606.ENSP00000396304	9606.ENSP00000385477	0	0	0	0.753	0	0	0.6	0.212	0.617
CLDN25	CLDN4	9606.ENSP00000396304	9606.ENSP00000409544	0	0	0	0.777	0	0	0.6	0.286	0.622
CLDN25	CLDN9	9606.ENSP00000396304	9606.ENSP00000398017	0	0	0	0.799	0.061	0	0.6	0.491	0.645
CLDN3	ESAM	9606.ENSP00000378577	9606.ENSP00000278927	0	0	0	0	0.056	0	0.6	0.196	0.67
CLDN3	TJP1	9606.ENSP00000378577	9606.ENSP00000281537	0	0	0	0	0.063	0.44	0	0.802	0.887
CLDN3	OCLN	9606.ENSP00000378577	9606.ENSP00000347379	0	0	0	0	0.09	0	0.6	0.868	0.947
CLDN3	CLDN7	9606.ENSP00000378577	9606.ENSP00000353475	0	0	0	0.934	0.34	0	0.9	0.808	0.934
CLDN3	ESRP1	9606.ENSP00000378577	9606.ENSP00000405738	0	0	0	0	0.363	0	0	0.135	0.426
CLDN3	TJP2	9606.ENSP00000378577	9606.ENSP00000438262	0	0	0	0	0.061	0.157	0	0.688	0.732
CLDN3	TJP3	9606.ENSP00000378577	9606.ENSP00000465419	0	0	0	0	0.361	0.108	0	0.682	0.803
CLDN3	CLDN9	9606.ENSP00000378577	9606.ENSP00000398017	0	0	0	0.968	0.077	0	0.9	0.582	0.905
CLDN3	CLDN6	9606.ENSP00000378577	9606.ENSP00000380131	0	0	0	0.959	0.088	0	0.9	0.797	0.908
CLDN3	CLDN8	9606.ENSP00000378577	9606.ENSP00000382783	0	0	0	0.933	0.107	0	0.9	0.81	0.911
CLDN3	CLDN4	9606.ENSP00000378577	9606.ENSP00000409544	0	0	0	0.973	0.348	0	0.9	0.913	0.933
CLDN3	CLDN5	9606.ENSP00000378577	9606.ENSP00000385477	0	0	0	0.946	0.061	0.379	0.9	0.844	0.939
CLDN4	SCARB1	9606.ENSP00000409544	9606.ENSP00000261693	0	0	0	0	0.087	0	0	0.379	0.408
CLDN4	ESAM	9606.ENSP00000409544	9606.ENSP00000278927	0	0	0	0	0.056	0	0.6	0.105	0.632
CLDN4	TJP1	9606.ENSP00000409544	9606.ENSP00000281537	0	0	0	0	0.074	0.44	0	0.785	0.879
CLDN4	OCLN	9606.ENSP00000409544	9606.ENSP00000347379	0	0	0	0	0.107	0	0.6	0.863	0.947
CLDN4	CLDN7	9606.ENSP00000409544	9606.ENSP00000353475	0	0	0	0.937	0.37	0	0.9	0.844	0.937
CLDN4	CLDN6	9606.ENSP00000409544	9606.ENSP00000380131	0	0	0	0.966	0.107	0	0.9	0.712	0.909
CLDN4	CLDN8	9606.ENSP00000409544	9606.ENSP00000382783	0	0	0	0.928	0.106	0	0.9	0.902	0.912
CLDN4	CLDN5	9606.ENSP00000409544	9606.ENSP00000385477	0	0	0	0.944	0	0	0.9	0.806	0.904
CLDN4	CLDN9	9606.ENSP00000409544	9606.ENSP00000398017	0	0	0	0.968	0.064	0	0.9	0.552	0.904
CLDN4	ESRP1	9606.ENSP00000409544	9606.ENSP00000405738	0	0	0	0	0.342	0	0	0.262	0.494
CLDN4	TJP3	9606.ENSP00000409544	9606.ENSP00000465419	0	0	0	0	0.173	0.085	0	0.628	0.694
CLDN4	TJP2	9606.ENSP00000409544	9606.ENSP00000438262	0	0	0	0	0.062	0.131	0	0.7	0.734
CLDN5	ESAM	9606.ENSP00000385477	9606.ENSP00000278927	0	0	0	0	0.261	0	0.6	0.465	0.828
CLDN5	TJP1	9606.ENSP00000385477	9606.ENSP00000281537	0	0	0	0	0.061	0.44	0	0.9	0.943
CLDN5	OCLN	9606.ENSP00000385477	9606.ENSP00000347379	0	0	0	0	0.062	0	0.6	0.935	0.973
CLDN5	CLDN7	9606.ENSP00000385477	9606.ENSP00000353475	0	0	0	0.92	0	0	0.9	0.801	0.906
CLDN5	CLDN6	9606.ENSP00000385477	9606.ENSP00000380131	0	0	0	0.944	0	0	0.9	0.546	0.902
CLDN5	CLDN8	9606.ENSP00000385477	9606.ENSP00000382783	0	0	0	0.905	0	0	0.9	0.656	0.906
CLDN5	TJP3	9606.ENSP00000385477	9606.ENSP00000465419	0	0	0	0	0	0.126	0	0.595	0.631
CLDN5	TJP2	9606.ENSP00000385477	9606.ENSP00000438262	0	0	0	0	0.049	0.158	0	0.784	0.812
CLDN5	CLDN9	9606.ENSP00000385477	9606.ENSP00000398017	0	0	0	0.95	0	0	0.9	0.499	0.902
CLDN6	FGF4	9606.ENSP00000380131	9606.ENSP00000168712	0	0	0	0	0.304	0	0	0.213	0.429
CLDN6	EFNA2	9606.ENSP00000380131	9606.ENSP00000215368	0	0	0	0	0.07	0	0	0.494	0.509
CLDN6	PCDHB5	9606.ENSP00000380131	9606.ENSP00000231134	0	0	0	0	0.063	0	0	0.591	0.601
CLDN6	ZSCAN10	9606.ENSP00000380131	9606.ENSP00000252463	0	0	0	0	0.298	0	0	0.289	0.48
CLDN6	POU5F1	9606.ENSP00000380131	9606.ENSP00000259915	0	0	0	0	0.325	0	0	0.317	0.519
CLDN6	SCARB1	9606.ENSP00000380131	9606.ENSP00000261693	0	0	0	0	0.064	0	0	0.473	0.485
CLDN6	SMAD2	9606.ENSP00000380131	9606.ENSP00000262160	0	0	0	0	0	0	0	0.419	0.418
CLDN6	ESAM	9606.ENSP00000380131	9606.ENSP00000278927	0	0	0	0	0.056	0	0.6	0.131	0.643
CLDN6	TJP1	9606.ENSP00000380131	9606.ENSP00000281537	0	0	0	0	0.053	0.44	0	0.464	0.691
CLDN6	MAL	9606.ENSP00000380131	9606.ENSP00000310880	0	0	0	0	0.064	0	0	0.419	0.432
CLDN6	ZFP42	9606.ENSP00000380131	9606.ENSP00000317686	0	0	0	0	0.107	0	0	0.411	0.451
CLDN6	SOX2	9606.ENSP00000380131	9606.ENSP00000323588	0	0	0	0	0.139	0	0	0.394	0.456
CLDN6	YLPM1	9606.ENSP00000380131	9606.ENSP00000324463	0	0	0	0	0	0	0	0.48	0.48
CLDN6	NOG	9606.ENSP00000380131	9606.ENSP00000328181	0	0	0	0	0	0	0	0.469	0.469
CLDN6	DNMT3B	9606.ENSP00000380131	9606.ENSP00000328547	0	0	0	0	0.346	0	0	0.212	0.463
CLDN6	GDF3	9606.ENSP00000380131	9606.ENSP00000331745	0	0	0	0	0.353	0	0	0.186	0.451
CLDN6	OTX2	9606.ENSP00000380131	9606.ENSP00000343819	0	0	0	0	0.238	0	0	0.424	0.542
CLDN6	OCLN	9606.ENSP00000380131	9606.ENSP00000347379	0	0	0	0	0.062	0	0.6	0.597	0.835
CLDN6	DNMT1	9606.ENSP00000380131	9606.ENSP00000352516	0	0	0	0	0.05	0	0	0.452	0.457
CLDN6	CLDN7	9606.ENSP00000380131	9606.ENSP00000353475	0	0	0	0.927	0.118	0	0.9	0.679	0.912
CLDN6	INADL	9606.ENSP00000380131	9606.ENSP00000360200	0	0	0	0	0	0.185	0	0.311	0.414
CLDN6	LIN28A	9606.ENSP00000380131	9606.ENSP00000363314	0	0	0	0	0.356	0	0	0.262	0.505
CLDN6	FOXA2	9606.ENSP00000380131	9606.ENSP00000400341	0	0	0	0	0.061	0	0	0.394	0.406
CLDN6	L1TD1	9606.ENSP00000380131	9606.ENSP00000419901	0	0	0	0	0.35	0	0	0.128	0.409
CLDN6	ESRP1	9606.ENSP00000380131	9606.ENSP00000405738	0	0	0	0	0.164	0	0	0.35	0.433
CLDN6	TJP3	9606.ENSP00000380131	9606.ENSP00000465419	0	0	0	0	0.061	0.085	0	0.422	0.46
CLDN6	TJP2	9606.ENSP00000380131	9606.ENSP00000438262	0	0	0	0	0.062	0.131	0	0.483	0.542
CLDN6	CLDN9	9606.ENSP00000380131	9606.ENSP00000398017	0	0	0	0.973	0.062	0	0.9	0.918	0.904
CLDN6	CLDN8	9606.ENSP00000380131	9606.ENSP00000382783	0	0	0	0.925	0.061	0	0.9	0.599	0.906
CLDN7	SCARB1	9606.ENSP00000353475	9606.ENSP00000261693	0	0	0	0	0.063	0.403	0	0.53	0.714
CLDN7	ESAM	9606.ENSP00000353475	9606.ENSP00000278927	0	0	0	0	0.056	0	0.6	0.06	0.614
CLDN7	TJP1	9606.ENSP00000353475	9606.ENSP00000281537	0	0	0	0	0	0.44	0	0.713	0.832
CLDN7	OCLN	9606.ENSP00000353475	9606.ENSP00000347379	0	0	0	0	0.106	0	0.6	0.729	0.894
CLDN7	INADL	9606.ENSP00000353475	9606.ENSP00000360200	0	0	0	0	0.062	0.057	0	0.398	0.421
CLDN7	ESRP1	9606.ENSP00000353475	9606.ENSP00000405738	0	0	0	0	0.389	0	0	0.255	0.525
CLDN7	TJP2	9606.ENSP00000353475	9606.ENSP00000438262	0	0	0	0	0.069	0.158	0	0.617	0.673
CLDN7	TJP3	9606.ENSP00000353475	9606.ENSP00000465419	0	0	0	0	0.234	0.126	0	0.556	0.677
CLDN7	CLDN9	9606.ENSP00000353475	9606.ENSP00000398017	0	0	0	0.934	0.077	0	0.9	0.528	0.906
CLDN7	CLDN8	9606.ENSP00000353475	9606.ENSP00000382783	0	0	0	0.919	0.099	0	0.9	0.764	0.911
CLDN8	ESAM	9606.ENSP00000382783	9606.ENSP00000278927	0	0	0	0	0.056	0	0.6	0.07	0.618
CLDN8	TJP1	9606.ENSP00000382783	9606.ENSP00000281537	0	0	0	0	0	0.44	0	0.72	0.836
CLDN8	OCLN	9606.ENSP00000382783	9606.ENSP00000347379	0	0	0	0	0.062	0	0.6	0.731	0.89
CLDN8	TJP2	9606.ENSP00000382783	9606.ENSP00000438262	0	0	0	0	0	0.157	0	0.75	0.78
CLDN8	TJP3	9606.ENSP00000382783	9606.ENSP00000465419	0	0	0	0	0.076	0.108	0	0.756	0.781
CLDN8	CLDN9	9606.ENSP00000382783	9606.ENSP00000398017	0	0	0	0.935	0.061	0	0.9	0.55	0.905
CLDN9	PCDHB5	9606.ENSP00000398017	9606.ENSP00000231134	0	0	0	0	0	0	0	0.629	0.629
CLDN9	SCARB1	9606.ENSP00000398017	9606.ENSP00000261693	0	0	0	0	0	0	0	0.45	0.45
CLDN9	ESAM	9606.ENSP00000398017	9606.ENSP00000278927	0	0	0	0	0.056	0	0.6	0.129	0.642
CLDN9	TJP1	9606.ENSP00000398017	9606.ENSP00000281537	0	0	0	0	0	0.185	0	0.344	0.442
CLDN9	OCLN	9606.ENSP00000398017	9606.ENSP00000347379	0	0	0	0	0.062	0	0.6	0.574	0.826
CLDN9	TJP2	9606.ENSP00000398017	9606.ENSP00000438262	0	0	0	0	0	0.157	0	0.385	0.459
CLDN9	TJP3	9606.ENSP00000398017	9606.ENSP00000465419	0	0	0	0	0.115	0.108	0	0.411	0.495
DNMT1	POU5F1	9606.ENSP00000352516	9606.ENSP00000259915	0	0	0	0	0.062	0	0	0.771	0.776
DNMT1	SOX2	9606.ENSP00000352516	9606.ENSP00000323588	0	0	0	0	0	0.145	0	0.74	0.768
DNMT1	DNMT3B	9606.ENSP00000352516	9606.ENSP00000328547	0	0	0	0	0.101	0.379	0.9	0.969	0.998
DNMT1	LIN28A	9606.ENSP00000352516	9606.ENSP00000363314	0	0	0	0	0.061	0	0	0.405	0.418
DNMT3B	FGF4	9606.ENSP00000328547	9606.ENSP00000168712	0	0	0	0	0.165	0	0	0.348	0.432
DNMT3B	ZSCAN10	9606.ENSP00000328547	9606.ENSP00000252463	0	0	0	0	0.169	0	0	0.31	0.402
DNMT3B	POU5F1	9606.ENSP00000328547	9606.ENSP00000259915	0	0	0	0	0.208	0	0	0.747	0.791
DNMT3B	ZFP42	9606.ENSP00000328547	9606.ENSP00000317686	0	0	0	0	0.09	0	0	0.541	0.564
DNMT3B	SOX2	9606.ENSP00000328547	9606.ENSP00000323588	0	0	0	0	0.137	0	0	0.645	0.68
DNMT3B	OTX2	9606.ENSP00000328547	9606.ENSP00000343819	0	0	0	0	0.139	0	0	0.388	0.45
DNMT3B	L1TD1	9606.ENSP00000328547	9606.ENSP00000419901	0	0	0	0	0.298	0	0	0.355	0.528
DNMT3B	GDF3	9606.ENSP00000328547	9606.ENSP00000331745	0	0	0	0	0.253	0	0	0.581	0.673
DNMT3B	LIN28A	9606.ENSP00000328547	9606.ENSP00000363314	0	0	0	0	0.272	0	0	0.585	0.685
ESAM	TJP1	9606.ENSP00000278927	9606.ENSP00000281537	0	0	0	0	0.061	0	0	0.4	0.412
ESAM	OCLN	9606.ENSP00000278927	9606.ENSP00000347379	0	0	0	0	0	0	0.6	0.455	0.772
ESRP1	POU5F1	9606.ENSP00000405738	9606.ENSP00000259915	0	0	0	0	0.118	0	0	0.5	0.541
FGF4	NOG	9606.ENSP00000168712	9606.ENSP00000328181	0	0	0	0	0	0	0	0.507	0.507
FGF4	OTX2	9606.ENSP00000168712	9606.ENSP00000343819	0	0	0	0	0.112	0.074	0	0.48	0.535
FGF4	FOXA2	9606.ENSP00000168712	9606.ENSP00000400341	0	0	0	0	0.065	0.051	0	0.537	0.553
FGF4	LIN28A	9606.ENSP00000168712	9606.ENSP00000363314	0	0	0	0	0.282	0	0	0.45	0.588
FGF4	ZFP42	9606.ENSP00000168712	9606.ENSP00000317686	0	0	0	0	0.078	0.053	0	0.575	0.597
FGF4	GDF3	9606.ENSP00000168712	9606.ENSP00000331745	0	0	0	0	0.366	0.05	0	0.567	0.717
FGF4	SOX2	9606.ENSP00000168712	9606.ENSP00000323588	0	0	0	0	0.107	0	0	0.721	0.741
FGF4	POU5F1	9606.ENSP00000168712	9606.ENSP00000259915	0	0	0	0	0.232	0	0	0.843	0.874
FOXA2	POU5F1	9606.ENSP00000400341	9606.ENSP00000259915	0	0	0	0	0	0	0	0.741	0.741
FOXA2	SMAD2	9606.ENSP00000400341	9606.ENSP00000262160	0	0	0	0	0	0.094	0	0.478	0.507
FOXA2	ZFP42	9606.ENSP00000400341	9606.ENSP00000317686	0	0	0	0	0	0.108	0	0.424	0.464
FOXA2	SOX2	9606.ENSP00000400341	9606.ENSP00000323588	0	0	0	0	0.086	0.095	0	0.747	0.773
FOXA2	NOG	9606.ENSP00000400341	9606.ENSP00000328181	0	0	0	0	0	0	0	0.547	0.547
FOXA2	GDF3	9606.ENSP00000400341	9606.ENSP00000331745	0	0	0	0	0.065	0.051	0	0.562	0.578
FOXA2	OTX2	9606.ENSP00000400341	9606.ENSP00000343819	0	0	0	0	0.063	0.379	0	0.785	0.864
GDF3	ZSCAN10	9606.ENSP00000331745	9606.ENSP00000252463	0	0	0	0	0.187	0.054	0	0.387	0.487
GDF3	POU5F1	9606.ENSP00000331745	9606.ENSP00000259915	0	0	0	0	0.342	0.052	0	0.699	0.796
GDF3	SMAD2	9606.ENSP00000331745	9606.ENSP00000262160	0	0	0	0	0	0.081	0	0.426	0.45
GDF3	ZFP42	9606.ENSP00000331745	9606.ENSP00000317686	0	0	0	0	0.064	0.054	0	0.644	0.657
GDF3	SOX2	9606.ENSP00000331745	9606.ENSP00000323588	0	0	0	0	0.119	0.089	0	0.702	0.74
GDF3	NOG	9606.ENSP00000331745	9606.ENSP00000328181	0	0	0	0	0	0.262	0	0.312	0.47
GDF3	L1TD1	9606.ENSP00000331745	9606.ENSP00000419901	0	0	0	0	0.35	0	0	0.168	0.436
GDF3	OTX2	9606.ENSP00000331745	9606.ENSP00000343819	0	0	0	0	0.142	0	0	0.455	0.512
GDF3	LIN28A	9606.ENSP00000331745	9606.ENSP00000363314	0	0	0	0	0.535	0	0	0.584	0.798
INADL	TJP1	9606.ENSP00000360200	9606.ENSP00000281537	0	0	0	0.539	0.061	0.188	0	0.694	0.454
INADL	OCLN	9606.ENSP00000360200	9606.ENSP00000347379	0	0	0	0	0.063	0	0	0.571	0.581
INADL	TJP2	9606.ENSP00000360200	9606.ENSP00000438262	0	0	0	0.54	0.062	0.179	0	0.676	0.441
INADL	TJP3	9606.ENSP00000360200	9606.ENSP00000465419	0	0	0	0.547	0.062	0.391	0	0.93	0.655
L1TD1	ZSCAN10	9606.ENSP00000419901	9606.ENSP00000252463	0	0	0	0	0.231	0	0	0.441	0.551
L1TD1	POU5F1	9606.ENSP00000419901	9606.ENSP00000259915	0	0	0	0	0.331	0.079	0	0.434	0.621
L1TD1	SOX2	9606.ENSP00000419901	9606.ENSP00000323588	0	0	0	0	0.147	0	0	0.36	0.431
L1TD1	LIN28A	9606.ENSP00000419901	9606.ENSP00000363314	0	0	0	0	0.546	0.379	0	0.7	0.908
LIN28A	ZSCAN10	9606.ENSP00000363314	9606.ENSP00000252463	0	0	0	0	0.265	0.05	0.9	0.364	0.949
LIN28A	POU5F1	9606.ENSP00000363314	9606.ENSP00000259915	0	0	0	0	0.356	0	0.9	0.943	0.996
LIN28A	SMAD2	9606.ENSP00000363314	9606.ENSP00000262160	0	0	0	0	0.061	0	0.9	0.266	0.925
LIN28A	ZFP42	9606.ENSP00000363314	9606.ENSP00000317686	0	0	0	0	0.156	0.05	0	0.584	0.637
LIN28A	SOX2	9606.ENSP00000363314	9606.ENSP00000323588	0	0	0	0	0.138	0.265	0.9	0.923	0.994
LIN28A	OTX2	9606.ENSP00000363314	9606.ENSP00000343819	0	0	0	0	0.22	0	0	0.4	0.512
NOG	POU5F1	9606.ENSP00000328181	9606.ENSP00000259915	0	0	0	0	0	0	0	0.58	0.58
NOG	SMAD2	9606.ENSP00000328181	9606.ENSP00000262160	0	0	0	0	0	0	0	0.537	0.537
NOG	SOX2	9606.ENSP00000328181	9606.ENSP00000323588	0	0	0	0	0.062	0	0	0.633	0.641
NOG	OTX2	9606.ENSP00000328181	9606.ENSP00000343819	0	0	0	0	0	0	0	0.499	0.499
OCLN	SCARB1	9606.ENSP00000347379	9606.ENSP00000261693	0	0	0	0	0	0	0	0.719	0.719
OCLN	TJP1	9606.ENSP00000347379	9606.ENSP00000281537	0	0	0	0	0.061	0.52	0	0.974	0.987
OCLN	TJP3	9606.ENSP00000347379	9606.ENSP00000465419	0	0	0	0	0.086	0.454	0	0.892	0.941
OCLN	TJP2	9606.ENSP00000347379	9606.ENSP00000438262	0	0	0	0	0.063	0.47	0	0.934	0.964
OTX2	POU5F1	9606.ENSP00000343819	9606.ENSP00000259915	0	0	0	0	0.122	0.132	0	0.741	0.786
OTX2	ZFP42	9606.ENSP00000343819	9606.ENSP00000317686	0	0	0	0	0.071	0.064	0	0.513	0.54
OTX2	SOX2	9606.ENSP00000343819	9606.ENSP00000323588	0	0	0	0	0.23	0	0	0.815	0.851
POU5F1	ZSCAN10	9606.ENSP00000259915	9606.ENSP00000252463	0	0	0	0	0.232	0.079	0.9	0.441	0.955
POU5F1	TJP1	9606.ENSP00000259915	9606.ENSP00000281537	0	0	0	0	0	0	0	0.404	0.404
POU5F1	ZFP42	9606.ENSP00000259915	9606.ENSP00000317686	0	0	0	0	0.12	0.086	0	0.775	0.803
POU5F1	SMAD2	9606.ENSP00000259915	9606.ENSP00000262160	0	0	0	0	0.049	0.064	0.9	0.555	0.955
POU5F1	SOX2	9606.ENSP00000259915	9606.ENSP00000323588	0	0	0	0	0.089	0.538	0.9	0.984	0.999
SMAD2	ZSCAN10	9606.ENSP00000262160	9606.ENSP00000252463	0	0	0	0	0	0.086	0.9	0.048	0.905
SMAD2	TJP1	9606.ENSP00000262160	9606.ENSP00000281537	0	0	0	0	0	0	0	0.5	0.5
SMAD2	SOX2	9606.ENSP00000262160	9606.ENSP00000323588	0	0	0	0	0	0.147	0.9	0.523	0.955
SOX2	ZSCAN10	9606.ENSP00000323588	9606.ENSP00000252463	0	0	0	0	0.107	0.125	0.9	0.415	0.948
SOX2	TJP1	9606.ENSP00000323588	9606.ENSP00000281537	0	0	0	0	0.076	0	0	0.428	0.448
SOX2	ZFP42	9606.ENSP00000323588	9606.ENSP00000317686	0	0	0	0	0.062	0.125	0	0.681	0.715
TJP1	TJP3	9606.ENSP00000281537	9606.ENSP00000465419	0	0	0	0.894	0.055	0.379	0	0.85	0.442
TJP1	TJP2	9606.ENSP00000281537	9606.ENSP00000438262	0	0	0	0.893	0.088	0.384	0.8	0.944	0.89
