# Supplementary material for: Identification of Claudin-6 as a Molecular Biomarker in Pan-Cancer Through Multiple Omics Integrative Analysis
Source: Front Cell Dev Biol. 2021 Aug 2;9:726656. doi: 10.3389/fcell.2021.726656 (PMC8365468; doi:10.3389/fcell.2021.726656)
Supplement: Supplementary file 11 [file Data_Sheet_1.ZIP › data/string_interactions of DEGs.tsv]

#node1	node2	node1_string_id	node2_string_id	neighborhood_on_chromosome	gene_fusion	phylogenetic_cooccurrence	homology	coexpression	experimentally_determined_interaction	database_annotated	automated_textmining	combined_score
ACTL8	MAGEA10	9606.ENSP00000364555	9606.ENSP00000244096	0	0	0	0	0	0	0	0.473	0.473
ACTL8	CTAG2	9606.ENSP00000364555	9606.ENSP00000247306	0	0	0	0	0.063	0	0	0.400	0.413
ACTL8	MAGEC1	9606.ENSP00000364555	9606.ENSP00000285879	0	0	0	0	0.102	0	0	0.527	0.557
ACTL8	MAGEA1	9606.ENSP00000364555	9606.ENSP00000349085	0	0	0	0	0.140	0	0	0.445	0.502
ACTL8	PLAC1	9606.ENSP00000364555	9606.ENSP00000352173	0	0	0	0	0.091	0	0	0.426	0.455
ACTL8	MAGEC2	9606.ENSP00000364555	9606.ENSP00000354660	0	0	0	0	0.123	0	0	0.448	0.495
ACTL8	GAGE2A	9606.ENSP00000364555	9606.ENSP00000355421	0	0	0	0	0.139	0	0	0.478	0.531
ACTL8	PASD1	9606.ENSP00000364555	9606.ENSP00000359382	0	0	0	0	0.140	0	0	0.530	0.578
ACTL8	CTCFL	9606.ENSP00000364555	9606.ENSP00000415579	0	0	0	0	0.096	0.085	0	0.400	0.460
ACTL8	CT45A1	9606.ENSP00000364555	9606.ENSP00000470185	0	0	0	0	0.065	0	0	0.532	0.543
ADAMTS8	SCGB1D4	9606.ENSP00000257359	9606.ENSP00000351395	0	0	0	0	0	0	0	0.410	0.410
ADAMTS8	SCGB3A1	9606.ENSP00000257359	9606.ENSP00000292641	0	0	0	0	0.061	0	0	0.447	0.459
ADRA1B	FFAR1	9606.ENSP00000306662	9606.ENSP00000246553	0	0	0	0	0	0	0.900	0.043	0.900
ADRA1B	NTS	9606.ENSP00000306662	9606.ENSP00000256010	0	0	0	0	0	0.263	0.900	0.348	0.947
ADRA1B	CRH	9606.ENSP00000306662	9606.ENSP00000276571	0	0	0	0	0.065	0	0	0.512	0.524
ADRA1B	SST	9606.ENSP00000306662	9606.ENSP00000287641	0	0	0	0	0.063	0	0	0.440	0.452
ADRA1B	PROK2	9606.ENSP00000306662	9606.ENSP00000295619	0	0	0	0	0	0	0.900	0	0.900
ADRA1B	TACR3	9606.ENSP00000306662	9606.ENSP00000303325	0	0	0	0.602	0	0	0.900	0.251	0.908
ADRA1B	CALCA	9606.ENSP00000306662	9606.ENSP00000331746	0	0	0	0	0	0	0	0.527	0.527
ADRA1B	NPY	9606.ENSP00000306662	9606.ENSP00000384364	0	0	0	0	0	0	0	0.669	0.669
ADRA1B	NPFFR2	9606.ENSP00000306662	9606.ENSP00000307822	0	0	0	0.606	0	0	0.900	0.133	0.903
ADRA1B	UTS2R	9606.ENSP00000306662	9606.ENSP00000323516	0	0	0	0.581	0.061	0	0.900	0.178	0.907
ADRA1B	NTSR1	9606.ENSP00000306662	9606.ENSP00000359532	0	0	0	0.590	0.063	0	0.900	0.197	0.908
ADRA1B	CASR	9606.ENSP00000306662	9606.ENSP00000420194	0	0	0	0	0	0.057	0.900	0.132	0.911
ADRA1B	GCGR	9606.ENSP00000306662	9606.ENSP00000383558	0	0	0	0	0.092	0	0.900	0.143	0.915
ADRA1B	CCK	9606.ENSP00000306662	9606.ENSP00000379472	0	0	0	0	0.098	0	0.900	0.429	0.943
ADRA1B	AVP	9606.ENSP00000306662	9606.ENSP00000369647	0	0	0	0	0	0	0.900	0.476	0.945
AMTN	BPIFB2	9606.ENSP00000341013	9606.ENSP00000170150	0	0	0	0	0	0	0.900	0	0.900
AMTN	APOA1	9606.ENSP00000341013	9606.ENSP00000236850	0	0	0	0	0	0	0.900	0	0.900
APOA1	BPIFB2	9606.ENSP00000236850	9606.ENSP00000170150	0	0	0	0	0.334	0	0.900	0.058	0.931
APOA1	PCK1	9606.ENSP00000236850	9606.ENSP00000319814	0	0	0	0	0.229	0	0	0.285	0.425
APOA1	GIG25	9606.ENSP00000236850	9606.ENSP00000376793	0	0	0	0	0.085	0	0	0.402	0.430
APOA1	SLC2A2	9606.ENSP00000236850	9606.ENSP00000323568	0	0	0	0	0.346	0	0	0.188	0.446
APOA1	NTS	9606.ENSP00000236850	9606.ENSP00000256010	0	0	0	0	0.426	0	0	0.082	0.450
APOA1	DLK1	9606.ENSP00000236850	9606.ENSP00000340292	0	0	0	0	0.330	0	0	0.349	0.545
APOA1	GPC5	9606.ENSP00000236850	9606.ENSP00000366267	0	0	0	0	0	0	0.900	0.045	0.900
ARHGAP36	IGSF1	9606.ENSP00000276211	9606.ENSP00000359940	0	0	0	0	0.214	0	0	0.451	0.550
AVP	FFAR1	9606.ENSP00000369647	9606.ENSP00000246553	0	0	0	0	0	0	0.900	0	0.900
AVP	SLC14A2	9606.ENSP00000369647	9606.ENSP00000255226	0	0	0	0	0	0	0	0.664	0.664
AVP	NTS	9606.ENSP00000369647	9606.ENSP00000256010	0	0	0	0	0.062	0	0.900	0.476	0.946
AVP	CDH19	9606.ENSP00000369647	9606.ENSP00000262150	0	0	0	0	0.509	0	0	0	0.509
AVP	CRH	9606.ENSP00000369647	9606.ENSP00000276571	0	0	0	0	0.064	0	0.900	0.910	0.990
AVP	SST	9606.ENSP00000369647	9606.ENSP00000287641	0	0	0	0	0.080	0	0	0.586	0.602
AVP	PROK2	9606.ENSP00000369647	9606.ENSP00000295619	0	0	0	0	0	0	0.900	0.325	0.929
AVP	TACR3	9606.ENSP00000369647	9606.ENSP00000303325	0	0	0	0	0.061	0	0.900	0.177	0.916
AVP	DRD5	9606.ENSP00000369647	9606.ENSP00000306129	0	0	0	0	0.061	0	0.900	0.250	0.923
AVP	NPFFR2	9606.ENSP00000369647	9606.ENSP00000307822	0	0	0	0	0.052	0	0.900	0.284	0.926
AVP	UTS2R	9606.ENSP00000369647	9606.ENSP00000323516	0	0	0	0	0.268	0	0.900	0.060	0.925
AVP	CALCA	9606.ENSP00000369647	9606.ENSP00000331746	0	0	0	0	0.062	0	0.900	0.573	0.956
AVP	NTSR1	9606.ENSP00000369647	9606.ENSP00000359532	0	0	0	0	0.062	0	0.900	0.079	0.906
AVP	SLC18A3	9606.ENSP00000369647	9606.ENSP00000363229	0	0	0	0	0.055	0	0.900	0.042	0.901
AVP	PDYN	9606.ENSP00000369647	9606.ENSP00000440185	0	0	0	0	0.064	0	0	0.530	0.541
AVP	GFAP	9606.ENSP00000369647	9606.ENSP00000468500	0	0	0	0	0.515	0	0	0.169	0.579
AVP	NPY	9606.ENSP00000369647	9606.ENSP00000384364	0	0	0	0	0.062	0	0	0.579	0.588
AVP	CALCB	9606.ENSP00000369647	9606.ENSP00000433490	0	0	0	0	0	0	0.900	0	0.900
AVP	GCGR	9606.ENSP00000369647	9606.ENSP00000383558	0	0	0	0	0	0	0.900	0.056	0.901
AVP	TSHR	9606.ENSP00000369647	9606.ENSP00000441235	0	0	0	0	0	0	0.900	0.112	0.907
AVP	CASR	9606.ENSP00000369647	9606.ENSP00000420194	0	0	0	0	0.064	0	0.900	0.307	0.929
AVP	CCK	9606.ENSP00000369647	9606.ENSP00000379472	0	0	0	0	0.061	0	0.900	0.521	0.951
BAGE5	MAGEA10	9606.ENSP00000485185	9606.ENSP00000244096	0	0	0	0	0	0	0	0.549	0.549
BAGE5	CTAG2	9606.ENSP00000485185	9606.ENSP00000247306	0	0	0	0	0	0	0	0.642	0.642
BAGE5	MAGEC1	9606.ENSP00000485185	9606.ENSP00000285879	0	0	0	0	0	0	0	0.644	0.644
BAGE5	MAGEA1	9606.ENSP00000485185	9606.ENSP00000349085	0	0	0	0	0	0	0	0.905	0.905
BAGE5	MAGEA4	9606.ENSP00000485185	9606.ENSP00000353379	0	0	0	0	0.069	0	0	0.557	0.569
BAGE5	MAGEC2	9606.ENSP00000485185	9606.ENSP00000354660	0	0	0	0	0.065	0	0	0.510	0.522
BAGE5	GAGE2A	9606.ENSP00000485185	9606.ENSP00000355421	0	0	0	0	0.062	0	0	0.904	0.906
BAGE5	MAGEB1	9606.ENSP00000485185	9606.ENSP00000368264	0	0	0	0	0	0	0	0.400	0.400
BAGE5	CT45A1	9606.ENSP00000485185	9606.ENSP00000470185	0	0	0	0	0.065	0	0	0.390	0.405
BAGE5	GAGE1	9606.ENSP00000485185	9606.ENSP00000484668	0	0	0	0	0	0	0	0.905	0.905
BPIFB2	SERPINA11	9606.ENSP00000170150	9606.ENSP00000335024	0	0	0	0	0.471	0	0	0	0.471
BRDT	MAGEC1	9606.ENSP00000387822	9606.ENSP00000285879	0	0	0	0	0	0	0	0.510	0.510
BRDT	MAGEC2	9606.ENSP00000387822	9606.ENSP00000354660	0	0	0	0	0	0	0	0.511	0.511
C1orf64	PIP	9606.ENSP00000332162	9606.ENSP00000291009	0	0	0	0	0	0	0	0.446	0.446
C4BPA	C4BPB	9606.ENSP00000356037	9606.ENSP00000243611	0	0	0	0.642	0.146	0	0.900	0.711	0.933
CA6	SCGB1A1	9606.ENSP00000366654	9606.ENSP00000278282	0	0	0	0	0	0	0	0.424	0.424
CA6	MUC7	9606.ENSP00000366654	9606.ENSP00000407422	0	0	0	0	0	0	0	0.449	0.449
CACNA1S	TNNT3	9606.ENSP00000355192	9606.ENSP00000278317	0	0	0	0	0.184	0	0	0.305	0.409
CACNA1S	SCN4A	9606.ENSP00000355192	9606.ENSP00000396320	0	0	0	0.664	0.133	0.130	0	0.838	0.433
CACNA1S	PPP2R2B	9606.ENSP00000355192	9606.ENSP00000377936	0	0	0	0	0.054	0	0.600	0.042	0.605
CALB1	NTS	9606.ENSP00000265431	9606.ENSP00000256010	0	0	0	0	0.078	0	0	0.499	0.518
CALB1	LHX1	9606.ENSP00000265431	9606.ENSP00000477829	0	0	0	0	0.097	0.077	0	0.345	0.406
CALB1	NKX2-1	9606.ENSP00000265431	9606.ENSP00000346879	0	0	0	0	0	0	0	0.481	0.481
CALB1	GRID2	9606.ENSP00000265431	9606.ENSP00000282020	0	0	0	0	0.197	0.057	0	0.381	0.490
CALB1	PDYN	9606.ENSP00000265431	9606.ENSP00000440185	0	0	0	0	0.107	0	0	0.495	0.530
CALB1	CALCA	9606.ENSP00000265431	9606.ENSP00000331746	0	0	0	0	0.051	0	0	0.538	0.543
CALB1	SLC18A3	9606.ENSP00000265431	9606.ENSP00000363229	0	0	0	0	0.091	0	0	0.520	0.545
CALB1	KLHL1	9606.ENSP00000265431	9606.ENSP00000367075	0	0	0	0	0.092	0.055	0	0.544	0.574
CALB1	GFAP	9606.ENSP00000265431	9606.ENSP00000468500	0	0	0	0	0.104	0	0	0.685	0.705
CALB1	CCK	9606.ENSP00000265431	9606.ENSP00000379472	0	0	0	0	0.118	0	0	0.700	0.725
CALB1	CHAT	9606.ENSP00000265431	9606.ENSP00000337103	0	0	0	0	0.061	0	0	0.749	0.754
CALB1	NPY	9606.ENSP00000265431	9606.ENSP00000384364	0	0	0	0	0.061	0	0	0.753	0.758
CALB1	SST	9606.ENSP00000265431	9606.ENSP00000287641	0	0	0	0	0.073	0	0	0.762	0.770
CALCA	NTS	9606.ENSP00000331746	9606.ENSP00000256010	0	0	0	0	0	0	0	0.713	0.713
CALCA	CRH	9606.ENSP00000331746	9606.ENSP00000276571	0	0	0	0	0.088	0	0.900	0.666	0.966
CALCA	SST	9606.ENSP00000331746	9606.ENSP00000287641	0	0	0	0	0.064	0	0	0.851	0.855
CALCA	TACR3	9606.ENSP00000331746	9606.ENSP00000303325	0	0	0	0	0	0	0	0.450	0.450
CALCA	DRD5	9606.ENSP00000331746	9606.ENSP00000306129	0	0	0	0	0	0	0.900	0.210	0.917
CALCA	NPFFR2	9606.ENSP00000331746	9606.ENSP00000307822	0	0	0	0	0	0	0	0.551	0.551
CALCA	NEFH	9606.ENSP00000331746	9606.ENSP00000311997	0	0	0	0	0.061	0	0	0.534	0.544
CALCA	SLC18A3	9606.ENSP00000331746	9606.ENSP00000363229	0	0	0	0	0	0	0	0.589	0.589
CALCA	CASR	9606.ENSP00000331746	9606.ENSP00000420194	0	0	0	0	0	0	0	0.604	0.604
CALCA	CHAT	9606.ENSP00000331746	9606.ENSP00000337103	0	0	0	0	0.055	0	0	0.660	0.664
CALCA	PDYN	9606.ENSP00000331746	9606.ENSP00000440185	0	0	0	0	0.063	0	0	0.669	0.676
CALCA	CCK	9606.ENSP00000331746	9606.ENSP00000379472	0	0	0	0	0	0	0	0.721	0.721
CALCA	NKX2-1	9606.ENSP00000331746	9606.ENSP00000346879	0	0	0	0	0	0	0	0.732	0.733
CALCA	NPY	9606.ENSP00000331746	9606.ENSP00000384364	0	0	0	0	0	0	0	0.869	0.869
CALCA	CALCB	9606.ENSP00000331746	9606.ENSP00000433490	0	0	0	0.939	0.088	0	0.900	0.788	0.909
CALCA	TSHR	9606.ENSP00000331746	9606.ENSP00000441235	0	0	0	0	0	0	0.900	0.389	0.936
CALCA	GCGR	9606.ENSP00000331746	9606.ENSP00000383558	0	0	0	0	0	0	0.900	0.400	0.937
CALCB	CRH	9606.ENSP00000433490	9606.ENSP00000276571	0	0	0	0	0	0	0.900	0	0.900
CALCB	DRD5	9606.ENSP00000433490	9606.ENSP00000306129	0	0	0	0	0	0	0.900	0	0.900
CALCB	GCGR	9606.ENSP00000433490	9606.ENSP00000383558	0	0	0	0	0	0	0.900	0	0.900
CALCB	TSHR	9606.ENSP00000433490	9606.ENSP00000441235	0	0	0	0	0.059	0	0.900	0	0.901
CASR	FFAR1	9606.ENSP00000420194	9606.ENSP00000246553	0	0	0	0	0	0	0.900	0.441	0.941
CASR	NTS	9606.ENSP00000420194	9606.ENSP00000256010	0	0	0	0	0	0	0.900	0.154	0.911
CASR	CLDN16	9606.ENSP00000420194	9606.ENSP00000264734	0	0	0	0	0	0	0	0.673	0.673
CASR	SST	9606.ENSP00000420194	9606.ENSP00000287641	0	0	0	0	0.081	0	0.900	0.283	0.928
CASR	PROK2	9606.ENSP00000420194	9606.ENSP00000295619	0	0	0	0	0	0	0.900	0	0.900
CASR	CLDN19	9606.ENSP00000420194	9606.ENSP00000296387	0	0	0	0	0	0	0	0.514	0.514
CASR	PNOC	9606.ENSP00000420194	9606.ENSP00000301908	0	0	0	0	0.056	0	0.900	0.044	0.901
CASR	TACR3	9606.ENSP00000420194	9606.ENSP00000303325	0	0	0	0	0.063	0	0.900	0.064	0.904
CASR	NPFFR2	9606.ENSP00000420194	9606.ENSP00000307822	0	0	0	0	0	0.057	0.900	0.143	0.912
CASR	PRSS1	9606.ENSP00000420194	9606.ENSP00000308720	0	0	0	0	0	0	0	0.509	0.509
CASR	UTS2R	9606.ENSP00000420194	9606.ENSP00000323516	0	0	0	0	0	0.057	0.900	0.068	0.904
CASR	NTSR1	9606.ENSP00000420194	9606.ENSP00000359532	0	0	0	0	0	0.057	0.900	0.080	0.905
CASR	CCK	9606.ENSP00000420194	9606.ENSP00000379472	0	0	0	0	0	0	0.900	0.420	0.939
CASR	GCGR	9606.ENSP00000420194	9606.ENSP00000383558	0	0	0	0	0.085	0	0.900	0.346	0.935
CASR	NPY	9606.ENSP00000420194	9606.ENSP00000384364	0	0	0	0	0.049	0	0.900	0.166	0.913
CASR	PDYN	9606.ENSP00000420194	9606.ENSP00000440185	0	0	0	0	0.053	0	0.900	0	0.901
CCK	FFAR1	9606.ENSP00000379472	9606.ENSP00000246553	0	0	0	0	0	0	0.900	0.560	0.954
CCK	SYT4	9606.ENSP00000379472	9606.ENSP00000255224	0	0	0	0	0.350	0	0	0.376	0.577
CCK	NTS	9606.ENSP00000379472	9606.ENSP00000256010	0	0	0	0	0.062	0	0.900	0.860	0.985
CCK	CRH	9606.ENSP00000379472	9606.ENSP00000276571	0	0	0	0	0.149	0	0	0.755	0.783
CCK	SST	9606.ENSP00000379472	9606.ENSP00000287641	0	0	0	0	0.203	0	0	0.938	0.949
CCK	PROK2	9606.ENSP00000379472	9606.ENSP00000295619	0	0	0	0	0	0	0.900	0.120	0.908
CCK	PNOC	9606.ENSP00000379472	9606.ENSP00000301908	0	0	0	0	0	0	0	0.447	0.447
CCK	TACR3	9606.ENSP00000379472	9606.ENSP00000303325	0	0	0	0	0.099	0	0.900	0.295	0.930
CCK	DRD5	9606.ENSP00000379472	9606.ENSP00000306129	0	0	0	0	0.171	0	0	0.442	0.518
CCK	NPFFR2	9606.ENSP00000379472	9606.ENSP00000307822	0	0	0	0	0	0	0.900	0.473	0.945
CCK	PRSS1	9606.ENSP00000379472	9606.ENSP00000308720	0	0	0	0	0	0	0	0.432	0.432
CCK	UTS2R	9606.ENSP00000379472	9606.ENSP00000323516	0	0	0	0	0	0	0.900	0.115	0.907
CCK	CHAT	9606.ENSP00000379472	9606.ENSP00000337103	0	0	0	0	0	0	0	0.513	0.513
CCK	NTSR1	9606.ENSP00000379472	9606.ENSP00000359532	0	0	0	0	0.062	0	0.900	0.268	0.925
CCK	MAG	9606.ENSP00000379472	9606.ENSP00000376048	0	0	0	0	0.478	0	0	0.062	0.489
CCK	GFAP	9606.ENSP00000379472	9606.ENSP00000468500	0	0	0	0	0.356	0	0	0.111	0.403
CCK	SOHLH1	9606.ENSP00000379472	9606.ENSP00000404438	0	0	0	0	0.449	0	0	0	0.449
CCK	GABRG2	9606.ENSP00000379472	9606.ENSP00000410732	0	0	0	0	0.384	0	0	0.225	0.502
CCK	PDYN	9606.ENSP00000379472	9606.ENSP00000440185	0	0	0	0	0.225	0	0	0.701	0.758
CCK	NPY	9606.ENSP00000379472	9606.ENSP00000384364	0	0	0	0	0.157	0	0	0.893	0.906
CCK	GCGR	9606.ENSP00000379472	9606.ENSP00000383558	0	0	0	0	0	0	0.900	0.298	0.926
CDH19	GFRA1	9606.ENSP00000262150	9606.ENSP00000347591	0	0	0	0	0	0	0	0.405	0.405
CDH19	GFAP	9606.ENSP00000262150	9606.ENSP00000468500	0	0	0	0	0.529	0	0	0.053	0.535
CHAT	TPH1	9606.ENSP00000337103	9606.ENSP00000250018	0	0	0	0	0	0	0	0.534	0.534
CHAT	NTS	9606.ENSP00000337103	9606.ENSP00000256010	0	0	0	0	0	0	0	0.473	0.473
CHAT	CRH	9606.ENSP00000337103	9606.ENSP00000276571	0	0	0	0	0	0	0	0.419	0.418
CHAT	SST	9606.ENSP00000337103	9606.ENSP00000287641	0	0	0	0	0.061	0	0	0.672	0.678
CHAT	DRD5	9606.ENSP00000337103	9606.ENSP00000306129	0	0	0	0	0.062	0	0	0.490	0.501
CHAT	NEFH	9606.ENSP00000337103	9606.ENSP00000311997	0	0	0	0	0	0	0	0.459	0.459
CHAT	PDYN	9606.ENSP00000337103	9606.ENSP00000440185	0	0	0	0	0	0	0	0.516	0.516
CHAT	GFAP	9606.ENSP00000337103	9606.ENSP00000468500	0	0	0	0	0.062	0	0	0.593	0.602
CHAT	NPY	9606.ENSP00000337103	9606.ENSP00000384364	0	0	0	0	0	0	0	0.680	0.680
CHAT	SLC18A3	9606.ENSP00000337103	9606.ENSP00000363229	0	0.060	0	0	0.291	0	0	0.940	0.956
CLDN16	CLDN9	9606.ENSP00000264734	9606.ENSP00000398017	0	0	0	0.652	0.061	0	0.900	0.587	0.921
CLDN16	CLDN19	9606.ENSP00000264734	9606.ENSP00000296387	0	0	0	0.634	0	0.379	0.900	0.952	0.957
CLDN19	CLDN9	9606.ENSP00000296387	9606.ENSP00000398017	0	0	0	0.922	0.063	0	0.900	0.502	0.905
COL9A1	COMP	9606.ENSP00000349790	9606.ENSP00000222271	0	0	0	0	0	0.393	0	0.633	0.768
COL9A1	COL9A3	9606.ENSP00000349790	9606.ENSP00000341640	0	0	0.434	0.887	0.641	0.868	0.900	0.846	0.995
COL9A3	COMP	9606.ENSP00000341640	9606.ENSP00000222271	0	0	0	0	0.061	0.064	0	0.647	0.662
COL9A3	MAG	9606.ENSP00000341640	9606.ENSP00000376048	0	0	0	0	0.131	0.336	0	0.056	0.408
COL9A3	LECT1	9606.ENSP00000341640	9606.ENSP00000367198	0	0	0	0	0.661	0	0	0.076	0.673
CRH	TPH1	9606.ENSP00000276571	9606.ENSP00000250018	0	0	0	0	0.062	0	0	0.533	0.544
CRH	NTS	9606.ENSP00000276571	9606.ENSP00000256010	0	0	0	0	0.061	0	0	0.718	0.724
CRH	NPFFR2	9606.ENSP00000276571	9606.ENSP00000307822	0	0	0	0	0	0	0	0.515	0.515
CRH	PNOC	9606.ENSP00000276571	9606.ENSP00000301908	0	0	0	0	0.064	0	0	0.572	0.582
CRH	NTSR1	9606.ENSP00000276571	9606.ENSP00000359532	0	0	0	0	0.063	0	0	0.635	0.644
CRH	PDYN	9606.ENSP00000276571	9606.ENSP00000440185	0	0	0	0	0.097	0	0	0.709	0.726
CRH	SST	9606.ENSP00000276571	9606.ENSP00000287641	0	0	0	0	0.159	0	0	0.762	0.792
CRH	NPY	9606.ENSP00000276571	9606.ENSP00000384364	0	0	0	0	0.092	0	0	0.868	0.875
CRH	TSHR	9606.ENSP00000276571	9606.ENSP00000441235	0	0	0	0	0	0	0.900	0.168	0.913
CRH	DRD5	9606.ENSP00000276571	9606.ENSP00000306129	0	0	0	0	0.076	0	0.900	0.471	0.946
CRH	GCGR	9606.ENSP00000276571	9606.ENSP00000383558	0	0	0	0	0	0.379	0.900	0.416	0.960
CRTAC1	SERPINA11	9606.ENSP00000359629	9606.ENSP00000335024	0	0	0	0	0	0	0	0.440	0.440
CT45A1	MAGEA10	9606.ENSP00000470185	9606.ENSP00000244096	0	0	0	0	0	0	0	0.559	0.559
CT45A1	CTAG2	9606.ENSP00000470185	9606.ENSP00000247306	0	0	0	0	0.070	0	0	0.517	0.531
CT45A1	MAGEC1	9606.ENSP00000470185	9606.ENSP00000285879	0	0	0	0	0.098	0	0	0.673	0.692
CT45A1	XAGE2B	9606.ENSP00000470185	9606.ENSP00000286049	0	0	0	0	0	0	0	0.556	0.556
CT45A1	FAM133A	9606.ENSP00000470185	9606.ENSP00000318974	0	0	0	0	0.061	0.692	0	0.093	0.714
CT45A1	MAGEA1	9606.ENSP00000470185	9606.ENSP00000349085	0	0	0	0	0.139	0	0	0.543	0.589
CT45A1	MAGEA4	9606.ENSP00000470185	9606.ENSP00000353379	0	0	0	0	0.139	0	0	0.551	0.596
CT45A1	MAGEC2	9606.ENSP00000470185	9606.ENSP00000354660	0	0	0	0	0.098	0	0	0.658	0.678
CT45A1	GAGE2A	9606.ENSP00000470185	9606.ENSP00000355421	0	0	0	0	0.152	0	0	0.579	0.627
CT45A1	PASD1	9606.ENSP00000470185	9606.ENSP00000359382	0	0	0	0	0.099	0	0	0.491	0.521
CT45A1	PAGE2B	9606.ENSP00000470185	9606.ENSP00000364110	0	0	0	0	0.063	0	0	0.389	0.403
CT45A1	CT45A5	9606.ENSP00000470185	9606.ENSP00000427342	0	0	0	0.985	0.523	0	0	0.931	0.529
CT45A1	GAGE1	9606.ENSP00000470185	9606.ENSP00000484668	0	0	0	0	0.077	0	0	0.411	0.433
CT45A1	CT45A10	9606.ENSP00000470185	9606.ENSP00000484601	0	0	0	0.984	0	0.798	0	0.516	0.799
CT45A10	MAGEA10	9606.ENSP00000484601	9606.ENSP00000244096	0	0	0	0	0	0	0	0.473	0.473
CT45A5	FAM133A	9606.ENSP00000427342	9606.ENSP00000318974	0	0	0	0	0.061	0	0	0.558	0.567
CT45A5	PAGE2B	9606.ENSP00000427342	9606.ENSP00000364110	0	0	0	0	0	0	0	0.441	0.441
CT45A5	MAGEB2	9606.ENSP00000427342	9606.ENSP00000368273	0	0	0	0	0.102	0	0	0.421	0.457
CTAG2	ENSG00000267978	9606.ENSP00000247306	9606.ENSP00000243314	0	0	0	0	0	0	0	0.588	0.588
CTAG2	MAGEA10	9606.ENSP00000247306	9606.ENSP00000244096	0	0	0	0	0	0	0	0.671	0.671
CTAG2	MAGEB2	9606.ENSP00000247306	9606.ENSP00000368273	0	0	0	0	0.088	0	0	0.429	0.456
CTAG2	MAGEB1	9606.ENSP00000247306	9606.ENSP00000368264	0	0	0	0	0.063	0	0	0.498	0.509
CTAG2	PASD1	9606.ENSP00000247306	9606.ENSP00000359382	0	0	0	0	0.076	0	0	0.553	0.569
CTAG2	GAGE1	9606.ENSP00000247306	9606.ENSP00000484668	0	0	0	0	0.074	0	0	0.556	0.571
CTAG2	GAGE2A	9606.ENSP00000247306	9606.ENSP00000355421	0	0	0	0	0.125	0	0	0.530	0.571
CTAG2	MAGEA9	9606.ENSP00000247306	9606.ENSP00000471017	0	0	0	0	0.088	0	0	0.588	0.608
CTAG2	MAGEC2	9606.ENSP00000247306	9606.ENSP00000354660	0	0	0	0	0.098	0	0	0.630	0.651
CTAG2	MAGEC1	9606.ENSP00000247306	9606.ENSP00000285879	0	0	0	0	0.094	0	0	0.704	0.720
CTAG2	MAGEA4	9606.ENSP00000247306	9606.ENSP00000353379	0	0	0	0	0.098	0	0	0.704	0.721
CTAG2	MAGEA1	9606.ENSP00000247306	9606.ENSP00000349085	0	0	0	0	0.152	0	0	0.725	0.756
CTCFL	MAGEA1	9606.ENSP00000415579	9606.ENSP00000349085	0	0	0	0	0	0	0	0.473	0.473
CTCFL	IGF2	9606.ENSP00000415579	9606.ENSP00000391826	0	0	0	0	0	0	0	0.802	0.803
DDX25	TDRD12	9606.ENSP00000263576	9606.ENSP00000390621	0	0	0	0	0.099	0.084	0	0.363	0.429
DLGAP3	UTS2R	9606.ENSP00000362444	9606.ENSP00000323516	0	0	0	0	0.720	0	0	0	0.720
DLK1	PGA5	9606.ENSP00000340292	9606.ENSP00000309542	0	0	0	0	0	0	0	0.447	0.447
DLK1	IGF2	9606.ENSP00000340292	9606.ENSP00000391826	0	0	0	0	0.218	0	0	0.689	0.746
DLK1	RTL1	9606.ENSP00000340292	9606.ENSP00000435342	0	0	0	0	0.083	0	0	0.825	0.833
DPYSL5	IGLON5	9606.ENSP00000288699	9606.ENSP00000270642	0	0	0	0	0.111	0	0	0.447	0.487
DPYSL5	LGALS7	9606.ENSP00000288699	9606.ENSP00000367891	0	0	0	0	0	0.490	0	0	0.489
DRD5	TPH1	9606.ENSP00000306129	9606.ENSP00000250018	0	0	0	0	0	0	0	0.509	0.509
DRD5	NTS	9606.ENSP00000306129	9606.ENSP00000256010	0	0	0	0	0.063	0.263	0	0.514	0.635
DRD5	SST	9606.ENSP00000306129	9606.ENSP00000287641	0	0	0	0	0.108	0	0	0.495	0.530
DRD5	NPY	9606.ENSP00000306129	9606.ENSP00000384364	0	0	0	0	0.076	0	0	0.491	0.509
DRD5	GABRG2	9606.ENSP00000306129	9606.ENSP00000410732	0	0	0	0	0.160	0.379	0	0.328	0.619
DRD5	PDYN	9606.ENSP00000306129	9606.ENSP00000440185	0	0	0	0	0.129	0	0	0.641	0.674
DRD5	TSHR	9606.ENSP00000306129	9606.ENSP00000441235	0	0	0	0.554	0.044	0	0.900	0.124	0.904
DRD5	GCGR	9606.ENSP00000306129	9606.ENSP00000383558	0	0	0	0	0	0	0.900	0.112	0.907
EEF1A2	ST8SIA3	9606.ENSP00000217182	9606.ENSP00000320431	0	0	0	0	0.118	0	0	0.474	0.516
ENSG00000267978	GAGE1	9606.ENSP00000243314	9606.ENSP00000484668	0	0	0	0	0	0	0	0.429	0.429
EYA4	MYOD1	9606.ENSP00000432770	9606.ENSP00000250003	0	0	0	0	0	0	0	0.482	0.482
EYA4	SIX3	9606.ENSP00000432770	9606.ENSP00000260653	0	0	0	0	0.062	0.269	0	0.695	0.772
EYA4	OTOF	9606.ENSP00000432770	9606.ENSP00000272371	0	0	0	0	0	0	0	0.400	0.400
FAM133A	MAGEC1	9606.ENSP00000318974	9606.ENSP00000285879	0	0	0	0	0.139	0	0	0.434	0.492
FAM133A	MAGEC2	9606.ENSP00000318974	9606.ENSP00000354660	0	0	0	0	0.215	0	0	0.281	0.412
FFAR1	GCK	9606.ENSP00000246553	9606.ENSP00000223366	0	0	0	0	0	0	0	0.452	0.452
FFAR1	SLC2A2	9606.ENSP00000246553	9606.ENSP00000323568	0	0	0	0	0	0	0	0.448	0.448
FFAR1	PROK2	9606.ENSP00000246553	9606.ENSP00000295619	0	0	0	0	0	0	0.900	0	0.900
FFAR1	NPFFR2	9606.ENSP00000246553	9606.ENSP00000307822	0	0	0	0	0	0	0.900	0	0.900
FFAR1	TACR3	9606.ENSP00000246553	9606.ENSP00000303325	0	0	0	0	0	0	0.900	0	0.900
FFAR1	UTS2R	9606.ENSP00000246553	9606.ENSP00000323516	0	0	0	0	0	0	0.900	0	0.900
FFAR1	NTSR1	9606.ENSP00000246553	9606.ENSP00000359532	0	0	0	0	0	0	0.900	0.064	0.902
FFAR1	NTS	9606.ENSP00000246553	9606.ENSP00000256010	0	0	0	0	0	0	0.900	0.111	0.907
FFAR1	GCGR	9606.ENSP00000246553	9606.ENSP00000383558	0	0	0	0	0	0	0.900	0.256	0.922
FOXD3	MYOD1	9606.ENSP00000360157	9606.ENSP00000250003	0	0	0	0	0.061	0	0	0.573	0.582
FOXD3	ZFP42	9606.ENSP00000360157	9606.ENSP00000317686	0	0	0	0	0.063	0.108	0	0.530	0.572
FOXD3	LIN28A	9606.ENSP00000360157	9606.ENSP00000363314	0	0	0	0	0.107	0	0	0.417	0.457
FOXD3	LHX1	9606.ENSP00000360157	9606.ENSP00000477829	0	0	0	0	0.060	0.124	0	0.408	0.470
FOXE1	SOX11	9606.ENSP00000364265	9606.ENSP00000322568	0	0	0	0	0	0.075	0	0.469	0.488
FOXE1	NKX2-1	9606.ENSP00000364265	9606.ENSP00000346879	0	0	0	0	0	0.111	0	0.742	0.761
FOXE1	HOXA4	9606.ENSP00000364265	9606.ENSP00000353151	0	0	0	0	0	0.111	0	0.471	0.510
FOXE1	NKX2-2	9606.ENSP00000364265	9606.ENSP00000366347	0	0	0	0	0	0.111	0	0.434	0.475
FOXE1	TSHR	9606.ENSP00000364265	9606.ENSP00000441235	0	0	0	0	0	0	0	0.708	0.708
FOXR2	SOX11	9606.ENSP00000427329	9606.ENSP00000322568	0	0	0	0	0	0.075	0	0.457	0.477
FXYD7	GFAP	9606.ENSP00000270310	9606.ENSP00000468500	0	0	0	0	0.198	0	0	0.530	0.606
GABRG2	SYT4	9606.ENSP00000410732	9606.ENSP00000255224	0	0	0	0	0.450	0	0	0.197	0.539
GABRG2	PCDH10	9606.ENSP00000410732	9606.ENSP00000264360	0	0	0	0	0.146	0	0	0.549	0.598
GABRG2	SST	9606.ENSP00000410732	9606.ENSP00000287641	0	0	0	0	0.217	0	0	0.294	0.423
GABRG2	GJA8	9606.ENSP00000410732	9606.ENSP00000358238	0	0	0	0	0	0	0	0.420	0.420
GABRG2	MAG	9606.ENSP00000410732	9606.ENSP00000376048	0	0	0	0	0.393	0	0	0.057	0.404
GABRG2	GFAP	9606.ENSP00000410732	9606.ENSP00000468500	0	0	0	0	0.352	0	0	0.155	0.429
GABRG2	RALYL	9606.ENSP00000410732	9606.ENSP00000430128	0	0	0	0	0.352	0	0	0.187	0.451
GAGE1	MAGEA10	9606.ENSP00000484668	9606.ENSP00000244096	0	0	0	0	0.076	0	0	0.556	0.572
GAGE1	MAGEC1	9606.ENSP00000484668	9606.ENSP00000285879	0	0	0	0	0.175	0	0	0.442	0.519
GAGE1	MAGEA11	9606.ENSP00000484668	9606.ENSP00000347358	0	0	0	0	0.098	0	0	0.400	0.435
GAGE1	MAGEA1	9606.ENSP00000484668	9606.ENSP00000349085	0	0	0	0	0.214	0	0	0.806	0.840
GAGE1	MAGEA4	9606.ENSP00000484668	9606.ENSP00000353379	0	0	0	0	0.087	0	0	0.647	0.663
GAGE1	MAGEC2	9606.ENSP00000484668	9606.ENSP00000354660	0	0	0	0	0.174	0	0	0.425	0.504
GAGE1	PAGE2B	9606.ENSP00000484668	9606.ENSP00000364110	0	0	0	0	0	0	0	0.473	0.473
GAGE1	MAGEB1	9606.ENSP00000484668	9606.ENSP00000368264	0	0	0	0	0	0	0	0.554	0.554
GAGE1	MAGEB2	9606.ENSP00000484668	9606.ENSP00000368273	0	0	0	0	0.111	0	0	0.557	0.589
GAGE1	MAGEA9	9606.ENSP00000484668	9606.ENSP00000471017	0	0	0	0	0.088	0	0	0.429	0.456
GAGE2A	MAGEA10	9606.ENSP00000355421	9606.ENSP00000244096	0	0	0	0	0.076	0	0	0.445	0.465
GAGE2A	MAGEC1	9606.ENSP00000355421	9606.ENSP00000285879	0	0	0	0	0.381	0	0	0.427	0.630
GAGE2A	MAGEA1	9606.ENSP00000355421	9606.ENSP00000349085	0	0	0	0	0.522	0	0	0.804	0.902
GAGE2A	MAGEA4	9606.ENSP00000355421	9606.ENSP00000353379	0	0	0	0	0.152	0	0	0.534	0.587
GAGE2A	MAGEC2	9606.ENSP00000355421	9606.ENSP00000354660	0	0	0	0	0.362	0	0	0.426	0.618
GAGE2A	MAGEB1	9606.ENSP00000355421	9606.ENSP00000368264	0	0	0	0	0.062	0	0	0.388	0.401
GAGE2A	MAGEB2	9606.ENSP00000355421	9606.ENSP00000368273	0	0	0	0	0.298	0	0	0.449	0.596
GAGE2A	PASD1	9606.ENSP00000355421	9606.ENSP00000359382	0	0	0	0	0.441	0	0	0.533	0.727
GBX1	SIX3	9606.ENSP00000297537	9606.ENSP00000260653	0	0	0	0	0.062	0	0	0.422	0.434
GBX1	LHX1	9606.ENSP00000297537	9606.ENSP00000477829	0	0	0	0	0	0.081	0	0.410	0.435
GBX1	SOHLH1	9606.ENSP00000297537	9606.ENSP00000404438	0	0	0	0	0	0	0	0.802	0.802
GCGR	GCK	9606.ENSP00000383558	9606.ENSP00000223366	0	0	0	0	0.064	0	0	0.481	0.494
GCGR	NTS	9606.ENSP00000383558	9606.ENSP00000256010	0	0	0	0	0	0	0.900	0.223	0.919
GCGR	SST	9606.ENSP00000383558	9606.ENSP00000287641	0	0	0	0	0.047	0	0	0.500	0.503
GCGR	PROK2	9606.ENSP00000383558	9606.ENSP00000295619	0	0	0	0	0	0	0.900	0	0.900
GCGR	TACR3	9606.ENSP00000383558	9606.ENSP00000303325	0	0	0	0	0	0	0.900	0.053	0.901
GCGR	NPFFR2	9606.ENSP00000383558	9606.ENSP00000307822	0	0	0	0	0	0	0.900	0.103	0.906
GCGR	PCK1	9606.ENSP00000383558	9606.ENSP00000319814	0	0	0	0	0.077	0	0	0.397	0.420
GCGR	UTS2R	9606.ENSP00000383558	9606.ENSP00000323516	0	0	0	0	0	0	0.900	0.151	0.911
GCGR	SLC2A2	9606.ENSP00000383558	9606.ENSP00000323568	0	0	0	0	0.149	0	0	0.422	0.487
GCGR	NTSR1	9606.ENSP00000383558	9606.ENSP00000359532	0	0	0	0	0.065	0	0.900	0.186	0.917
GCGR	TSHR	9606.ENSP00000383558	9606.ENSP00000441235	0	0	0	0	0.061	0	0.900	0.196	0.917
GCK	NPY	9606.ENSP00000223366	9606.ENSP00000384364	0	0	0	0	0.065	0	0	0.448	0.461
GCK	MAFA	9606.ENSP00000223366	9606.ENSP00000328364	0	0	0	0	0	0	0	0.484	0.484
GCK	NKX2-2	9606.ENSP00000223366	9606.ENSP00000366347	0	0	0	0	0.069	0	0	0.498	0.513
GCK	SST	9606.ENSP00000223366	9606.ENSP00000287641	0	0	0	0	0.076	0	0	0.541	0.558
GCK	PCK1	9606.ENSP00000223366	9606.ENSP00000319814	0	0	0	0	0.063	0	0	0.733	0.739
GCK	TKTL1	9606.ENSP00000223366	9606.ENSP00000358931	0	0	0	0	0.080	0	0.800	0.267	0.853
GCK	SLC2A2	9606.ENSP00000223366	9606.ENSP00000323568	0	0	0	0	0.063	0	0	0.903	0.906
GFAP	SST	9606.ENSP00000468500	9606.ENSP00000287641	0	0	0	0	0.120	0	0	0.392	0.442
GFAP	POU3F3	9606.ENSP00000468500	9606.ENSP00000355001	0	0	0	0	0.232	0.057	0	0.311	0.457
GFAP	NKX2-2	9606.ENSP00000468500	9606.ENSP00000366347	0	0	0	0	0.132	0	0	0.518	0.564
GFAP	MAG	9606.ENSP00000468500	9606.ENSP00000376048	0	0	0	0	0.494	0	0	0.540	0.757
GFAP	NPY	9606.ENSP00000468500	9606.ENSP00000384364	0	0	0	0	0.125	0	0	0.460	0.508
GFAP	SP8	9606.ENSP00000468500	9606.ENSP00000408792	0	0	0	0	0.062	0	0	0.438	0.451
GFRA1	GFRA4	9606.ENSP00000347591	9606.ENSP00000313423	0	0	0	0.811	0	0	0.900	0.640	0.911
GFRA1	LHX1	9606.ENSP00000347591	9606.ENSP00000477829	0	0	0	0	0	0	0	0.424	0.424
GFRA1	MAGEA4	9606.ENSP00000347591	9606.ENSP00000353379	0	0	0	0	0	0	0	0.447	0.447
GFRA1	SOHLH1	9606.ENSP00000347591	9606.ENSP00000404438	0	0	0	0	0	0	0	0.585	0.585
GP2	PIP	9606.ENSP00000370767	9606.ENSP00000291009	0	0	0	0	0	0	0	0.440	0.440
GP2	LYPD2	9606.ENSP00000370767	9606.ENSP00000352163	0	0	0	0	0	0	0.900	0	0.900
GP2	NTNG1	9606.ENSP00000370767	9606.ENSP00000359085	0	0	0	0	0	0	0.900	0	0.900
GPC5	NDST3	9606.ENSP00000366267	9606.ENSP00000296499	0	0	0	0	0.061	0.179	0.900	0.459	0.952
HMGA2	IGF2BP1	9606.ENSP00000437621	9606.ENSP00000290341	0	0	0	0	0.292	0	0	0.501	0.631
HMGA2	NKX2-1	9606.ENSP00000437621	9606.ENSP00000346879	0	0	0	0	0	0.064	0	0.554	0.565
HMGA2	LIN28A	9606.ENSP00000437621	9606.ENSP00000363314	0	0	0	0	0.139	0	0	0.807	0.827
HMGA2	TRIM71	9606.ENSP00000437621	9606.ENSP00000373272	0	0	0	0	0.092	0.050	0	0.380	0.419
HMGA2	IGF2	9606.ENSP00000437621	9606.ENSP00000391826	0	0	0	0	0	0	0	0.650	0.650
HOXA4	PRSS1	9606.ENSP00000353151	9606.ENSP00000308720	0	0	0	0	0	0	0	0.503	0.503
IGF2	MYOD1	9606.ENSP00000391826	9606.ENSP00000250003	0	0	0	0	0	0	0	0.555	0.555
IGF2	SST	9606.ENSP00000391826	9606.ENSP00000287641	0	0	0	0	0	0	0	0.440	0.440
IGF2	IGF2BP1	9606.ENSP00000391826	9606.ENSP00000290341	0	0	0	0	0	0	0	0.805	0.806
IGF2	WT1	9606.ENSP00000391826	9606.ENSP00000331327	0	0	0	0	0	0	0	0.734	0.734
IGF2	LIN28A	9606.ENSP00000391826	9606.ENSP00000363314	0	0	0	0	0	0	0	0.646	0.647
IGF2	RTL1	9606.ENSP00000391826	9606.ENSP00000435342	0	0	0	0	0.061	0	0	0.447	0.458
IGF2BP1	LIN28A	9606.ENSP00000290341	9606.ENSP00000363314	0	0	0	0	0.360	0.260	0	0.474	0.729
IGSF1	PASD1	9606.ENSP00000359940	9606.ENSP00000359382	0	0	0	0	0.665	0	0	0	0.665
ITLN2	TFF3	9606.ENSP00000357008	9606.ENSP00000430690	0	0	0	0	0.069	0	0	0.433	0.449
KLK5	KLK7	9606.ENSP00000337733	9606.ENSP00000375683	0	0	0.445	0.924	0.663	0	0	0.797	0.693
LGALS7	ST8SIA3	9606.ENSP00000367891	9606.ENSP00000320431	0	0	0	0	0	0	0	0.678	0.678
LHX1	SIX3	9606.ENSP00000477829	9606.ENSP00000260653	0	0	0	0	0.061	0	0	0.540	0.550
LHX1	WNT7A	9606.ENSP00000477829	9606.ENSP00000285018	0	0	0	0	0.060	0.165	0	0.384	0.475
LHX1	WT1	9606.ENSP00000477829	9606.ENSP00000331327	0	0	0	0	0	0.077	0	0.576	0.591
LHX1	POU3F3	9606.ENSP00000477829	9606.ENSP00000355001	0	0	0	0	0.110	0.097	0	0.433	0.505
LHX1	NKX2-2	9606.ENSP00000477829	9606.ENSP00000366347	0	0	0	0	0.137	0.074	0	0.492	0.559
LIN28A	ZFP42	9606.ENSP00000363314	9606.ENSP00000317686	0	0	0	0	0.156	0.050	0	0.584	0.637
LIN28A	SOHLH1	9606.ENSP00000363314	9606.ENSP00000404438	0	0	0	0	0	0	0	0.509	0.509
LIN28A	TRIM71	9606.ENSP00000363314	9606.ENSP00000373272	0	0	0	0	0.374	0.102	0	0.754	0.849
LIX1	UGT3A1	9606.ENSP00000274382	9606.ENSP00000274278	0	0	0	0	0.697	0	0	0	0.697
LIX1	LMO1	9606.ENSP00000274382	9606.ENSP00000338207	0	0	0	0	0.061	0	0	0.439	0.451
LIX1	SLCO1A2	9606.ENSP00000274382	9606.ENSP00000305974	0	0	0	0	0.848	0	0	0.045	0.849
LYPD2	NTNG1	9606.ENSP00000352163	9606.ENSP00000359085	0	0	0	0	0	0	0.900	0	0.900
MAFA	SLC2A2	9606.ENSP00000328364	9606.ENSP00000323568	0	0	0	0	0	0	0	0.563	0.563
MAFA	NKX2-2	9606.ENSP00000328364	9606.ENSP00000366347	0	0	0	0	0	0.050	0	0.685	0.688
MAG	NEFH	9606.ENSP00000376048	9606.ENSP00000311997	0	0	0	0	0.219	0	0	0.454	0.555
MAG	NKX2-2	9606.ENSP00000376048	9606.ENSP00000366347	0	0	0	0	0.158	0.064	0	0.351	0.444
MAG	SOHLH1	9606.ENSP00000376048	9606.ENSP00000404438	0	0	0	0	0.485	0	0	0	0.485
MAGEA1	MAGEC1	9606.ENSP00000349085	9606.ENSP00000285879	0	0	0	0.870	0.390	0	0	0.733	0.447
MAGEA1	WT1	9606.ENSP00000349085	9606.ENSP00000331327	0	0	0	0	0.062	0	0	0.450	0.462
MAGEA1	MAGEC2	9606.ENSP00000349085	9606.ENSP00000354660	0	0	0	0.869	0.364	0	0	0.670	0.418
MAGEA1	PASD1	9606.ENSP00000349085	9606.ENSP00000359382	0	0	0	0	0.354	0	0	0.473	0.645
MAGEA10	MAGEC2	9606.ENSP00000244096	9606.ENSP00000354660	0	0	0	0.905	0.554	0	0	0.630	0.580
MAGEA10	MAGEA4	9606.ENSP00000244096	9606.ENSP00000353379	0	0	0	0.945	0.544	0.120	0	0.795	0.599
MAGEA10	PASD1	9606.ENSP00000244096	9606.ENSP00000359382	0	0	0	0	0.780	0	0	0.450	0.873
MAGEA11	TKTL1	9606.ENSP00000347358	9606.ENSP00000358931	0	0	0	0	0	0	0	0.497	0.497
MAGEA4	XAGE2B	9606.ENSP00000353379	9606.ENSP00000286049	0	0	0	0	0	0	0	0.428	0.428
MAGEA4	PASD1	9606.ENSP00000353379	9606.ENSP00000359382	0	0	0	0	0.661	0	0	0.355	0.771
MAGEA8	TKTL1	9606.ENSP00000438293	9606.ENSP00000358931	0	0	0	0	0	0	0	0.426	0.426
MAGEB2	XAGE2B	9606.ENSP00000368273	9606.ENSP00000286049	0	0	0	0	0	0	0	0.486	0.486
MAGEB2	PASD1	9606.ENSP00000368273	9606.ENSP00000359382	0	0	0	0	0.246	0	0	0.266	0.422
MAGEB2	PAGE2B	9606.ENSP00000368273	9606.ENSP00000364110	0	0	0	0	0.076	0	0	0.507	0.525
MAGEC1	PAGE5	9606.ENSP00000285879	9606.ENSP00000289619	0	0	0	0	0.171	0	0	0.492	0.560
MAGEC1	MAGEC2	9606.ENSP00000285879	9606.ENSP00000354660	0	0	0	0.937	0.779	0	0	0.800	0.790
MAGEC1	PASD1	9606.ENSP00000285879	9606.ENSP00000359382	0	0	0	0	0.779	0	0	0.529	0.891
MAGEC2	PAGE5	9606.ENSP00000354660	9606.ENSP00000289619	0	0	0	0	0.256	0	0	0.582	0.675
MAGEC2	PASD1	9606.ENSP00000354660	9606.ENSP00000359382	0	0	0	0	0.768	0	0	0.355	0.843
MEOX1	MYOD1	9606.ENSP00000321684	9606.ENSP00000250003	0	0	0	0	0	0.059	0	0.427	0.438
MUC5B	SCGB1A1	9606.ENSP00000436812	9606.ENSP00000278282	0	0	0	0	0.063	0	0	0.443	0.456
MUC5B	MUC6	9606.ENSP00000436812	9606.ENSP00000406861	0	0	0	0.735	0.111	0	0.900	0.873	0.928
MUC5B	MUC7	9606.ENSP00000436812	9606.ENSP00000407422	0	0	0	0	0	0	0.900	0.865	0.985
MUC5B	TFF3	9606.ENSP00000436812	9606.ENSP00000430690	0	0	0	0	0.127	0	0	0.447	0.496
MUC6	TFF3	9606.ENSP00000406861	9606.ENSP00000430690	0	0	0	0	0	0	0	0.529	0.529
MUC6	MUC7	9606.ENSP00000406861	9606.ENSP00000407422	0	0	0	0	0	0	0.900	0.793	0.978
MYH6	MYOD1	9606.ENSP00000386041	9606.ENSP00000250003	0	0	0	0	0.092	0	0	0.773	0.786
MYH6	MYH7B	9606.ENSP00000386041	9606.ENSP00000262873	0	0	0	0.974	0.120	0	0.540	0.659	0.584
MYH6	TNNT3	9606.ENSP00000386041	9606.ENSP00000278317	0	0	0	0	0.268	0.157	0.900	0.536	0.967
MYH6	MYOZ1	9606.ENSP00000386041	9606.ENSP00000352272	0	0	0	0	0.113	0	0	0.450	0.491
MYH6	TNNT1	9606.ENSP00000386041	9606.ENSP00000467176	0	0	0	0	0.164	0.128	0.900	0.536	0.961
MYH7B	MYOD1	9606.ENSP00000262873	9606.ENSP00000250003	0	0	0	0	0.064	0	0	0.607	0.617
MYH7B	TNNT1	9606.ENSP00000262873	9606.ENSP00000467176	0	0	0	0	0.143	0.128	0	0.341	0.465
MYH7B	TNNT3	9606.ENSP00000262873	9606.ENSP00000278317	0	0	0	0	0.230	0.157	0	0.427	0.595
MYOD1	TMEFF2	9606.ENSP00000250003	9606.ENSP00000272771	0	0	0	0	0	0	0	0.423	0.423
MYOD1	TNNT1	9606.ENSP00000250003	9606.ENSP00000467176	0	0	0	0	0.064	0	0	0.411	0.425
MYOD1	WNT7A	9606.ENSP00000250003	9606.ENSP00000285018	0	0	0	0	0	0	0	0.484	0.484
MYOD1	TNNT3	9606.ENSP00000250003	9606.ENSP00000278317	0	0	0	0	0.303	0	0	0.420	0.579
MYOZ1	TNNT3	9606.ENSP00000352272	9606.ENSP00000278317	0	0	0	0	0.538	0	0	0.533	0.775
NKX2-1	SIX3	9606.ENSP00000346879	9606.ENSP00000260653	0	0	0	0	0.064	0	0	0.605	0.614
NKX2-1	SCGB1A1	9606.ENSP00000346879	9606.ENSP00000278282	0	0	0	0	0.077	0	0	0.682	0.694
NKX2-1	SST	9606.ENSP00000346879	9606.ENSP00000287641	0	0	0	0	0	0	0	0.603	0.603
NKX2-1	PIP	9606.ENSP00000346879	9606.ENSP00000291009	0	0	0	0	0	0	0	0.558	0.558
NKX2-1	WT1	9606.ENSP00000346879	9606.ENSP00000331327	0	0	0	0	0	0.059	0	0.527	0.536
NKX2-1	SP8	9606.ENSP00000346879	9606.ENSP00000408792	0	0	0	0	0	0.059	0	0.401	0.412
NKX2-1	NR5A1	9606.ENSP00000346879	9606.ENSP00000362690	0	0	0	0	0.058	0.159	0	0.364	0.452
NKX2-1	NPY	9606.ENSP00000346879	9606.ENSP00000384364	0	0	0	0	0	0	0	0.502	0.502
NKX2-1	SFTA3	9606.ENSP00000346879	9606.ENSP00000428331	0	0	0	0	0.473	0	0	0.510	0.730
NKX2-1	TSHR	9606.ENSP00000346879	9606.ENSP00000441235	0	0	0	0	0.085	0	0	0.802	0.812
NKX2-1	SFTPB	9606.ENSP00000346879	9606.ENSP00000386346	0	0	0	0	0.179	0	0	0.871	0.889
NKX2-2	SIX3	9606.ENSP00000366347	9606.ENSP00000260653	0	0	0	0	0.064	0	0	0.474	0.487
NKX2-2	SST	9606.ENSP00000366347	9606.ENSP00000287641	0	0	0	0	0.133	0	0	0.601	0.639
NKX2-2	SLC2A2	9606.ENSP00000366347	9606.ENSP00000323568	0	0	0	0	0	0.053	0	0.659	0.663
NKX2-2	POU3F3	9606.ENSP00000366347	9606.ENSP00000355001	0	0	0	0	0.117	0.075	0	0.514	0.569
NPFFR2	NTS	9606.ENSP00000307822	9606.ENSP00000256010	0	0	0	0	0	0.263	0.900	0.511	0.960
NPFFR2	SST	9606.ENSP00000307822	9606.ENSP00000287641	0	0	0	0	0	0	0	0.448	0.448
NPFFR2	PROK2	9606.ENSP00000307822	9606.ENSP00000295619	0	0	0	0	0	0	0.900	0.081	0.904
NPFFR2	TACR3	9606.ENSP00000307822	9606.ENSP00000303325	0	0	0	0.682	0.061	0	0.900	0.474	0.916
NPFFR2	NPY	9606.ENSP00000307822	9606.ENSP00000384364	0	0	0	0	0	0.379	0	0.616	0.751
NPFFR2	UTS2R	9606.ENSP00000307822	9606.ENSP00000323516	0	0	0	0.633	0	0	0.900	0.143	0.903
NPFFR2	NTSR1	9606.ENSP00000307822	9606.ENSP00000359532	0	0	0	0.575	0	0	0.900	0.396	0.915
NPY	TPH1	9606.ENSP00000384364	9606.ENSP00000250018	0	0	0	0	0	0	0	0.419	0.419
NPY	NTS	9606.ENSP00000384364	9606.ENSP00000256010	0	0	0	0	0.061	0	0	0.765	0.769
NPY	SST	9606.ENSP00000384364	9606.ENSP00000287641	0	0	0	0	0.176	0	0.900	0.905	0.991
NPY	PNOC	9606.ENSP00000384364	9606.ENSP00000301908	0	0	0	0	0.061	0	0.900	0.500	0.948
NPY	TACR3	9606.ENSP00000384364	9606.ENSP00000303325	0	0	0	0	0.055	0	0	0.481	0.488
NPY	SLC2A2	9606.ENSP00000384364	9606.ENSP00000323568	0	0	0	0	0	0	0	0.408	0.408
NPY	NR5A1	9606.ENSP00000384364	9606.ENSP00000362690	0	0	0	0	0	0	0	0.480	0.480
NPY	SLC18A3	9606.ENSP00000384364	9606.ENSP00000363229	0	0	0	0	0	0	0	0.589	0.589
NPY	PDYN	9606.ENSP00000384364	9606.ENSP00000440185	0	0	0	0	0.119	0	0.900	0.739	0.975
NR5A1	WT1	9606.ENSP00000362690	9606.ENSP00000331327	0	0	0	0	0.098	0.064	0	0.811	0.826
NR5A1	SOHLH1	9606.ENSP00000362690	9606.ENSP00000404438	0	0	0	0	0.059	0	0	0.434	0.444
NTNG1	SLITRK2	9606.ENSP00000359085	9606.ENSP00000359521	0	0	0	0	0.107	0	0	0.370	0.414
NTS	PDYN	9606.ENSP00000256010	9606.ENSP00000440185	0	0	0	0	0.063	0	0	0.734	0.740
NTS	SST	9606.ENSP00000256010	9606.ENSP00000287641	0	0	0	0	0.064	0	0	0.857	0.860
NTS	PROK2	9606.ENSP00000256010	9606.ENSP00000295619	0	0	0	0	0	0	0.900	0.164	0.912
NTS	TACR3	9606.ENSP00000256010	9606.ENSP00000303325	0	0	0	0	0.062	0	0.900	0.270	0.925
NTS	UTS2R	9606.ENSP00000256010	9606.ENSP00000323516	0	0	0	0	0	0.263	0.900	0.200	0.935
NTS	NTSR1	9606.ENSP00000256010	9606.ENSP00000359532	0	0	0	0	0.062	0.917	0.900	0.933	0.999
NTSR1	PROK2	9606.ENSP00000359532	9606.ENSP00000295619	0	0	0	0	0	0	0.900	0.056	0.901
NTSR1	TACR3	9606.ENSP00000359532	9606.ENSP00000303325	0	0	0	0.604	0.063	0	0.900	0.215	0.909
NTSR1	UTS2R	9606.ENSP00000359532	9606.ENSP00000323516	0	0	0	0.612	0	0	0.900	0.067	0.901
OBP2A	OBP2B	9606.ENSP00000441028	9606.ENSP00000484615	0	0	0	0.982	0.298	0.689	0	0.905	0.776
OTOF	SYT4	9606.ENSP00000272371	9606.ENSP00000255224	0	0	0	0	0.107	0	0	0.626	0.651
PCK1	SLC2A2	9606.ENSP00000319814	9606.ENSP00000323568	0	0	0	0	0.313	0	0	0.628	0.733
PDYN	SST	9606.ENSP00000440185	9606.ENSP00000287641	0	0	0	0	0.153	0	0.900	0.705	0.972
PDYN	PNOC	9606.ENSP00000440185	9606.ENSP00000301908	0	0	0	0	0.061	0	0.900	0.797	0.979
PDYN	TACR3	9606.ENSP00000440185	9606.ENSP00000303325	0	0	0	0	0.107	0	0	0.669	0.691
PDYN	PPP2R2B	9606.ENSP00000440185	9606.ENSP00000377936	0	0	0	0	0.130	0	0	0.384	0.441
PGA5	PRSS1	9606.ENSP00000309542	9606.ENSP00000308720	0	0	0	0	0.063	0	0	0.482	0.494
PGA5	SFTPB	9606.ENSP00000309542	9606.ENSP00000386346	0	0	0	0	0.065	0	0.900	0.056	0.904
PIP	SCGB2A2	9606.ENSP00000291009	9606.ENSP00000227918	0	0	0	0	0.525	0	0	0.571	0.787
PIP	WT1	9606.ENSP00000291009	9606.ENSP00000331327	0	0	0	0	0	0	0	0.510	0.510
PLAC1	XAGE2B	9606.ENSP00000352173	9606.ENSP00000286049	0	0	0	0	0	0	0	0.405	0.405
PNOC	SST	9606.ENSP00000301908	9606.ENSP00000287641	0	0	0	0	0.064	0	0.900	0.353	0.934
POU3F3	SOX11	9606.ENSP00000355001	9606.ENSP00000322568	0	0	0	0	0.061	0.538	0	0.399	0.717
POU6F2	WT1	9606.ENSP00000384004	9606.ENSP00000331327	0	0	0	0	0	0.079	0	0.570	0.587
PROK2	UTS2R	9606.ENSP00000295619	9606.ENSP00000323516	0	0	0	0	0	0	0.900	0	0.900
PROK2	TACR3	9606.ENSP00000295619	9606.ENSP00000303325	0	0	0	0	0	0	0.900	0.670	0.965
RAX	SIX3	9606.ENSP00000334813	9606.ENSP00000260653	0	0	0	0	0.062	0	0	0.727	0.733
SCGB1A1	SCGB2A2	9606.ENSP00000278282	9606.ENSP00000227918	0	0	0	0	0	0	0	0.527	0.527
SCGB1A1	SFTA3	9606.ENSP00000278282	9606.ENSP00000428331	0	0	0	0	0.089	0	0	0.496	0.521
SCGB1A1	SCGB3A1	9606.ENSP00000278282	9606.ENSP00000292641	0	0	0	0	0.227	0	0	0.603	0.680
SCGB1A1	SFTPB	9606.ENSP00000278282	9606.ENSP00000386346	0	0	0	0	0.378	0	0	0.632	0.761
SCGB3A1	TMEFF2	9606.ENSP00000292641	9606.ENSP00000272771	0	0	0	0	0.048	0	0	0.399	0.403
SFTA3	SFTPB	9606.ENSP00000428331	9606.ENSP00000386346	0	0	0	0	0.077	0	0.900	0.324	0.932
SIX3	SOX11	9606.ENSP00000260653	9606.ENSP00000322568	0	0	0	0	0.116	0.096	0	0.336	0.424
SLC18A3	TPH1	9606.ENSP00000363229	9606.ENSP00000250018	0	0	0	0	0.082	0	0	0.517	0.538
SLC18A3	SST	9606.ENSP00000363229	9606.ENSP00000287641	0	0	0	0	0.062	0	0	0.491	0.502
SLC2A2	SST	9606.ENSP00000323568	9606.ENSP00000287641	0	0	0	0	0	0	0	0.639	0.639
SLC5A8	TSHR	9606.ENSP00000445340	9606.ENSP00000441235	0	0	0	0	0.053	0	0	0.441	0.447
SLC6A15	SLC7A10	9606.ENSP00000266682	9606.ENSP00000253188	0.041	0	0	0	0.078	0	0	0.424	0.447
SLCO1A2	UGT3A1	9606.ENSP00000305974	9606.ENSP00000274278	0	0	0	0	0.697	0	0	0.092	0.713
SST	TPH1	9606.ENSP00000287641	9606.ENSP00000250018	0	0	0	0	0.061	0	0	0.416	0.428
SST	UTS2R	9606.ENSP00000287641	9606.ENSP00000323516	0	0	0	0	0	0	0	0.448	0.448
ST8SIA3	SYT4	9606.ENSP00000320431	9606.ENSP00000255224	0	0	0	0	0.508	0	0	0	0.508
SYT4	XKR7	9606.ENSP00000255224	9606.ENSP00000477059	0	0	0	0	0.362	0	0	0.307	0.539
TACR3	UTS2R	9606.ENSP00000303325	9606.ENSP00000323516	0	0	0	0.609	0	0	0.900	0.090	0.902
TNNT1	TNNT3	9606.ENSP00000467176	9606.ENSP00000278317	0	0	0	0.959	0.084	0	0.900	0.670	0.907
UPK2	UPK3B	9606.ENSP00000264031	9606.ENSP00000257632	0	0	0	0	0.065	0	0	0.802	0.807
UPK3B	WT1	9606.ENSP00000257632	9606.ENSP00000331327	0	0	0	0	0.063	0	0	0.394	0.407
WNT10A	WNT7A	9606.ENSP00000258411	9606.ENSP00000285018	0	0	0	0.898	0.061	0	0.900	0.705	0.909
